# Supplementary material for: White light emission generated by two stacking patterns of a single organic molecular crystal
Source: Royal Society of Chemistry journal article supplement (doi:10.1039/d2ma00670g), 2022-01-01
Supplement: d2ma00670g1.pdf [file d2ma00670g1.pdf]

## Supplementary Information:

### White light emission generated by two stacking patterns of a single organic molecular crystal

Yuma Nakagawa,\*<sup>a</sup> Kuon Kinoshita,<sup>a</sup> Megumi Kasuno,<sup>a</sup> Ryo Nishimura,<sup>b</sup> Masakazu Morimoto,<sup>b</sup> Satoshi Yokojima,\*<sup>c,d</sup> Makoto Hatakeyama,<sup>d,e</sup> Yuki Sakamoto,<sup>d</sup> Shinichiro Nakamura<sup>d</sup> and Kingo Uchida\*<sup>a,d</sup>

<sup>a</sup> Department of Materials Chemistry, Faculty of Science and Technology, Ryukoku University, Seta, Otsu, Shiga 520-2194, Japan.

<sup>b</sup> Department of Chemistry and Research Center for Smart Molecules, Rikkyo University, 3-34-1 Nishi-Ikebukuro, Toshima-ku, Tokyo 171-8501, Japan.

<sup>c</sup> School of Pharmacy, Tokyo University of Pharmacy and Life Sciences, 1432-1 Horinouchi, Hachioji, Tokyo 192-0392, Japan.

<sup>d</sup> RIKEN, Cluster for Science, Technology and Innovation Hub, Nakamura Laboratory, 2-1 Hirosawa, Wako, Saitama 351-0198, Japan.

<sup>e</sup> Faculty of Pharmaceutical Science, Sanyo-Onoda City University, 1-1-1 Daigakudori, Sanyo-Onoda, Yamaguchi 756-0884, Japan.

## Table and Contents

### Materials and Methods

|                                                  |    |
|--------------------------------------------------|----|
| 1. General information                           | S4 |
| 2. X-ray crystallographic analysis               | S5 |
| 3. Theoretical calculation                       | S5 |
| 4. Synthesis                                     | S8 |
| 5. Preparation of <b>1ar</b> /PS composite films | S9 |

### Figures and Tables

|          |     |
|----------|-----|
| Fig. S1  | S10 |
| Fig. S2  | S11 |
| Fig. S3  | S11 |
| Fig. S4  | S12 |
| Fig. S5  | S13 |
| Fig. S6  | S13 |
| Fig. S7  | S14 |
| Table S1 | S15 |
| Fig. S8  | S16 |
| Fig. S9  | S16 |
| Fig. S10 | S17 |
| Fig. S11 | S17 |
| Fig. S12 | S18 |
| Table S2 | S18 |
| Fig. S13 | S19 |
| Table S3 | S19 |
| Fig. S14 | S20 |
| Table S4 | S20 |
| Fig. S15 | S21 |
| Table S5 | S21 |
| Table S6 | S24 |
| Table S6 | S27 |
| Fig. S16 | S30 |

|            |     |
|------------|-----|
| Fig. S17   | S31 |
| Table S8   | S31 |
| Table S9   | S33 |
| Table S10  | S36 |
| Fig. S18   | S38 |
| Fig. S19   | S39 |
| Fig. S20   | S39 |
| Table S11  | S40 |
| Table S12  | S41 |
| Table S13  | S42 |
| Table S14  | S43 |
| Fig. S21   | S43 |
| References | S44 |

## Materials and Methods

### 1. General information

$^1\text{H}$  (400 MHz),  $^{13}\text{C}$  (100 MHz), and  $^{19}\text{F}$  NMR (376 MHz) spectra were recorded at room temperature with a JEOL JNM-400 spectrometer. Chemical shifts of  $^1\text{H}$  and  $^{13}\text{C}$  NMR are given in parts per million (ppm) using the residual solvent peak(s) as a reference.<sup>[S1]</sup> Chemical shifts of  $^{19}\text{F}$  NMR are given in ppm using  $\text{C}_6\text{F}_6$  (-164.9 ppm). Multiplicities of the signals are described as follows: s = singlet, m = multiplet or overlap of nonequivalent resonances. The NMR spectra of compounds were recorded in  $\text{CDCl}_3$ . Melting points were measured on Yanaco MP-500D. The apparent pH of the organic solvent was measured with a HORIBA pH METER D-52. The high-resolution mass spectrometry (HRMS) was recorded with a JEOL JMS-S3000 SpiralTOF. Absorption spectra of the solutions were monitored with a Hitachi U-4150 spectrophotometer. Fluorescence spectra of the solutions and excitation spectra of the crystals were monitored with a Hitachi F-7100 Fluorescence Spectrophotometer equipped with Toshiba colour filters (UV-35). Fluorescence spectra in **1ar** solution were measured by adjusting the absorbance at the excitation wavelength to  $0.05 \pm 0.005$ , unless otherwise noted. Fluorescence quantum yields of the solutions were calculated from the relative ratio using 9,10-diphenylanthracene in ethanol ( $\Phi_{\text{Flu}} = 0.96$ )<sup>[S2]</sup>. Fluorescence spectra, absorption spectra, and absolute fluorescence quantum yields of the crystals were monitored with a Hamamatsu photonics Quantaaurus-QY. Fluorescence lifetime measurements were monitored with a Hamamatsu photonics Quantaaurus-Tau. Excitation spectra of the crystals were monitored with a Hitachi F-7100 Fluorescence Spectrophotometer. Optical microscopic images were recorded with a KEYENCE VH-S30. For the UV light irradiation, a UV hand lamp SPECTROLINE Model EB-280C/J ( $\lambda = 313$  nm), an AS ONE Handy UV Lamp LUV-6 ( $\lambda = 365$  nm,  $810 \mu\text{W cm}^{-2}$ ), and a KEYENCE UV-400, UV-50H ( $\lambda = 365$  nm, 277 or 544  $\text{mW cm}^{-2}$ ) were used. All measurements were performed at room temperature unless otherwise specified. Elemental analysis of the compounds was carried out at the Graduate School and Faculty of Pharmaceutical Sciences, Kyoto University. HRMS measurements of the compounds were carried out at the Division of Materials Science, Nara Institute of Science and Technology. The diagram of CIE1931 coordinates was created using ColorAC.<sup>[S3]</sup>

The Gaussian16 program package<sup>[S4]</sup> was used for geometry optimization with density functional theory (DFT)<sup>[S5,S6]</sup> for ground states. The B3LYP<sup>[S7-S9]</sup> functional was adopted as the exchange-correlation term of DFT. The 6-31G(d,p) basis set was adopted for all calculations. The D2 version of Grimme's dispersion<sup>[S10]</sup> as an empirical dispersion force model was used for all calculations except for monomer and dimer. Jmol software was used to visualize the Frontier molecular orbitals.<sup>[S11]</sup> In addition, monomer and dimer calculations were performed by the CIS(D) method.<sup>[S12,S13]</sup> To better understand the characteristics of each state, we further performed geometry optimization for a monomer by imposing  $\text{C}_{2v}$  symmetry by B3LYP with a 6-31G(d) basis set. The optimized structure was used to calculate the excited states by TDDFT with B3LYP, CIS(D), and SAC-CI with level1. The 6-31G(d) basis set was used for these calculations.

## 2. X-ray crystallographic analysis

X-ray crystallographic analysis for **1ar** crystal was performed with an X-ray diffractometer (Bruker AXS, D8 QUEST) with Mo K $\alpha$  radiation ( $\lambda = 0.71073$  Å). The crystal was cooled using a low-temperature controller (Japan Thermal Engineering, JAN 2-12). The diffraction frames were integrated with the Bruker SAINT program. The cell constants were determined by global refinement. The data were corrected for absorption effects using the multi-scan method (SADABS). The structure was solved by the direct method and refined by the full-matrix least-squares method using the SHELX-2014 program. The positions of all hydrogen atoms were calculated geometrically and refined by the riding model. The crystallographic data can be obtained free of charge from the Cambridge Crystallographic Data Centre via [www.ccdc.cam.ac.uk/data\\_request/cif](http://www.ccdc.cam.ac.uk/data_request/cif) (CCDC No. 2159901).

## 3. Theoretical investigation of the origin of two fluorescent peaks by quantum chemical calculations

### 3.1 Origin of the broad fluorescent spectrum with two peaks

DFT calculations of **1ar** were performed to gain insight into the optical features in solution (dispersed state) and crystalline state (aggregated state). Full optimization of the structure of each conformer of **1ar** was obtained from X-ray crystallographic analysis for the ground state at the B3LYP/6-31G(d,p) level of theory. Calculation of vibrational frequencies is carried out to confirm that the optimized structure corresponds to a minimum on the potential energy surface. Then, the first 15 singlet excited states were calculated by the time-dependent (TD)<sup>[S14-S16]</sup> DFT method based on the B3LYP/6-31G(d,p) level of theory. The excited state calculations were performed (1) for the optimized structure of **1ar** (2) for the structures extracted from X-ray crystallographic analysis data for monomers, a unit cell consisting of tetramer, and 8-9mers, and (3) for the structures where the molecular packings were the same as (2) but with each conformer replaced with an optimized structure.

The lowest excitation energies of monomer of **1ar** calculated by TDDFT in Table S7 $\dagger$  agrees with the energetically lowest peak in the experimental absorption spectrum in Fig. S5 $\dagger$ . In comparison with the results in Table S4 $\dagger$ , where the X-ray crystallographic structure was employed instead of the geometry optimized structure in Table S7 $\dagger$ , we found that the excitation energy is reduced by about 0.1 eV. We can expect a similar energy reduction for the aggregated case by replacing each monomer in the crystal by the optimized structure. Thus, we further calculated the excitation energies for aggregates of **1ar** assembled as in the crystal structure.

The lowest excitation energy of molecules of **1ar** in a unit cell was slightly reduced in comparison with those of the monomers. The excitation energies from the first to 4th excited states have similar values due to the fact that those states are approximately linear combinations of the lowest excited state of four monomers in the unit cell. The oscillator strength of the lowest excited state is nearly zero, whereas two states with large oscillator strength exist only at slightly higher energies (2<sup>nd</sup> and 4<sup>th</sup> excited states). We discuss this point later. The shift of the wavelength from the monomer to the

tetramer in the unit cell is small due to the fact that the four molecules are spatially apart. Thus, we further calculated larger systems to include the effects of  $\pi$ -stacking and neighbouring molecules.

As shown in Tables S5 and S6†, the lowest excitation energies are further reduced by increasing the size. By replacing each monomer with the optimized structure, the lowest excitation energy become 3.11 eV (399.21 nm) for the large supercell extended by 0.5 unit cells for the *a* and *b* axes. A large shift of the absorption edge is due to the spatially spreading excited state consisting of a  $\pi$ -orbital over many molecules. Thus, for a much larger size, as in the crystal of **1ar** together with the relaxation of the structure, the large shift of the second peak (565 nm) in Fig. 2(h) may be one explanation.

As for the first peak in the fluorescence spectrum around 425 nm, we assume that it is mainly due to the decay from the localized state in monomer. If the excited state (energy) migrated to lower energies states, we would not be able to observe the short lifetime in Fig. 2 (i). This short lifetime in Fig. 2 (i) suggests that the excited state is localized on the monomer, and it is relaxed quickly enough.

### 3.2 Origin of the strong fluorescence

Here, we noticed that all of the oscillator strength of the lowest excited states in these calculations, except monomer, are zero or very small. In experiment, by contrast, we observed a strong fluorescence. In order to understand this point, we further performed the excited state calculations by different methods.

We first performed CIS(D) calculations for dimers of **1ar**. The CIS(D) calculation estimates the excitation energies of excited states by perturbatively including the effect of the double excitation on the CIS energies. As shown in Fig. 4b, there are four types of stacking dimer. For convenience, we call these dimers Type 1 to Type 4 from left to right in Fig. 4b. Type 1 and Type 2 are dimer of conformer A, and others are dimer of conformer B. Although there are subtle differences in the excited states of these dimers, overall, the results are similar (Tables S10 and S11†). As in Table S11†, the excited states obtained by CIS resembles those of TDDFT in Table S10†, except that the excitation energies are over-estimated. In contrast, the excitation energy of the 4<sup>th</sup> excited state in CIS become the lowest excited state in CIS(D). Since this state has a large oscillator strength, this result is consistent with the experimental result. This suggests that the inclusion of double excitation is critical.

To confirm this result, we performed monomer calculations (Tables S12 and S13†). First, to check that the main character of excited states does not change by imposing the C<sub>2v</sub> symmetry, CIS(D)/3-31G calculations were performed for both X-ray crystallographic structures and the C<sub>2v</sub> symmetric structure of monomer of **1ar**. Although there were slight changes in the excitation energies, the lowest three states were quite similar. (Note, for the comparison between three methods in Table S13†, the order of the excited states in CIS and CIS(D) of Table S13† is based on the CIS(D) energy, unlike in Table S12†. Thus, for the comparison between Tables S12† and S13, we need to keep in mind that the first and second excited states in Table S12† correspond to the second and first excited states in Table S13†, respectively.) Among the excited states in C<sub>2v</sub> symmetric structure, the symmetry of the lowest excited states of TDDFT and CIS is B<sub>2</sub>, but that of SAC-CI and CIS(D) is A<sub>1</sub>. The first excited state of TDDFT is due to the HOMO-LUMO transition as in Fig. S13†; the transition dipole moment is in

the horizontal direction. On the other hand, the first excited state of SAC-CI is due to the HOMO-1-LUMO transition as shown in Fig. S14†; the transition dipole moment is thus in the vertical direction. (The MOs of monomers in Figs. S13 and S14† are given by the calculation of X-ray crystallographic structure, but the structure with  $C_{2v}$  symmetry produced quite similar results.) By including the effect of double excitations consistently, the lowest excited states by SAC-CI and CIS(D) are  $A_1$  symmetric. The TDDFT includes the effect of correlation only partially and consequently gave the wrong order of the first and second excited states.

As for the dimer case, its excited states are given by linear combination of the excited state of two monomers. Thus, both the HOMO and HOMO-1 in Fig. S15† are basically the HOMO of monomer in Fig. S14† but with a different sign for one of the monomers. Similarly, the LUMO and LUMO-1 in Fig. S15† are assigned to the LUMO in Fig. S14† but with a different sign. Other MOs have similar characteristics. The major contributions for the first and second excited states obtained by CIS in Table S11† are due to HOMO→LUMO, HOMO-1→LUMO+1 and HOMO→LUMO+1, HOMO-1→LUMO transitions. Thus, the excitations are attributed to the combination of the HOMO→LUMO transition of monomer with a different phase. In contrast, the major contributions for the third and fourth excited states obtained by CIS in Table S11† are due to HOMO-2→LUMO, HOMO-3→LUMO+1 and HOMO-2→LUMO+1, HOMO-3→LUMO transitions. Thus, the excitations are attributed to the combination of the HOMO-1→LUMO transition of monomer with a different phase. For the dimer case, inclusion of the effect of double excitation by CIS(D) changes the order of the excited states from the fourth to the first, from the third to the second, from the first to the third, and from the second to the fourth.

The change in the order of the third and fourth excited states in CIS become lower energies in CIS(D) due to the change in the order of the excited state of monomer. The change in the order between the third and fourth excited states in CIS due to the inclusion of the effect of double excitation is most likely due to the relative position of the dimer. The structures of these dimers are considered intermediate between J-type and H-type aggregations.<sup>[S17,S18]</sup> Without inclusion of the effect of double excitations, the excitation is dominant near the  $\pi$ -stacking area, which has the characteristic of H-type aggregation. By the inclusion of the effect of double excitations, it is expected that the excitation would spread and thus produce characteristics of a J-type aggregation.

As for the larger systems, by the inclusion of the effect of double excitations, we thus expect that the lowest excited state would have large oscillator strength by a similar mechanism as that discussed above.

## 4. Synthesis

### Synthesis of 1,2-bis(2-phenylthiazol-4-yl)perfluorocyclopentene (**1o**)

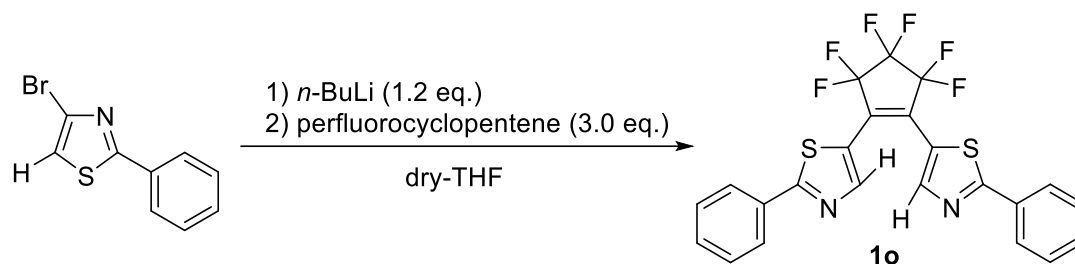

To a 100-mL three-neck flask containing 1.50 g (6.25 mmol) of 4-bromo-2-phenylthiazole, 30 mL of THF anhydrous was added in a dry-ice methanol bath at  $-78^{\circ}\text{C}$  in an argon gas atmosphere. To this solution, 4.7 mL (7.50 mmol, 1.2 eq.) of 1.6 N *n*-BuLi hexane solution was gradually added while maintaining the temperature and stirring for 1 h. Then 1.6 mL (18.75 mmol, 3.0 eq.) of perfluorocyclopentene was added, followed by stirring another 30 min, and then the temperature of the reaction mixture was allowed to warm to  $-50^{\circ}\text{C}$ . Then the mixture was stirred for 5 h at that temperature. After the reaction was completed, 50 mL of water was added, and the mixture was allowed to warm to room temperature. The solvent of THF was evaporated with a rotary evaporator. The mixture was extracted with 60 mL of diethyl ether applied four times. The organic layer was washed with 100 mL of brine and dehydrated over sodium sulphate anhydrous. After removal of sodium sulphate by filtration, the solvents were removed with a rotary evaporator. Then the obtained residue was purified by silica gel column chromatography, using a mixture of *n*-hexane and ethyl acetate (98:2 (v/v)) as eluent, to obtain 200 mg (0.404 mmol) of **1o** as pale-yellow crystals in 13% yield.

**1o**: m.p.  $164.4\text{--}165.3^{\circ}\text{C}$ .  $^1\text{H}$  NMR (400 MHz,  $\text{CDCl}_3$ , ppm)  $\delta$  8.20 (s, 2H), 7.98–7.95 (m, 4H), 7.50–7.44 (m, 6H).  $^{13}\text{C}$  NMR (100 MHz,  $\text{CDCl}_3$ , ppm)  $\delta$  173.0, 147.9, 132.6, 131.6, 129.4, 127.2, 122.3.  $^{19}\text{F}$  NMR (376 MHz,  $\text{CDCl}_3$ , ppm)  $\delta$  -112.7 (s, 4F), -133.7 (s, 2F). HRMS (MALDI, positive):  $m/z$  calcd. for  $\text{C}_{23}\text{H}_{13}\text{N}_2\text{F}_6\text{S}_2$   $[\text{M}+\text{H}]^+$ : 495.04243, found: 495.04164. Anal. Calcd. for  $\text{C}_{23}\text{H}_{12}\text{N}_2\text{F}_6\text{S}_2$ : C, 55.87; H, 2.45; N, 5.67. Found: C, 55.83; H, 2.30; N, 5.66.

### Fabrication of **1ar**

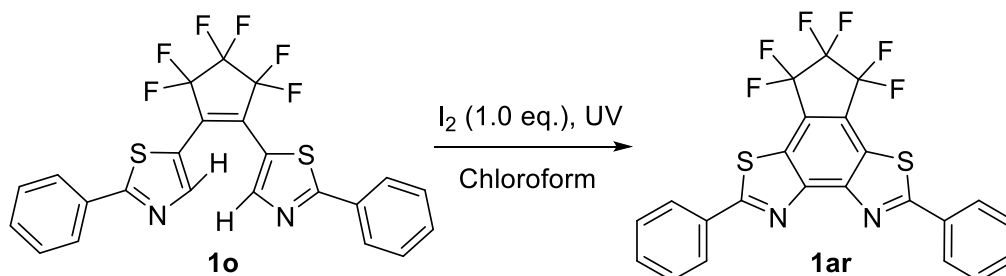

Chloroform (18 mL) containing 45.0 mg (91.01  $\mu\text{mol}$ ) of **1o** and 23.1 mg (91.01  $\mu\text{mol}$ ) of iodine ( $\text{I}_2$ ) was prepared. The solution was irradiated with UV light ( $\lambda = 365$  nm,  $810$   $\mu\text{W cm}^{-2}$ ) for 21 h. Then, 2 mL of sat.  $\text{NaHCO}_3$  aq. and 4 mL of sodium thiosulfate aq. were added to the solution. The solution was extracted with 30 mL of dichloromethane (DCM) three times and dehydrated over sodium sulphate



anhydrous. After removal of sodium sulphate by filtration, the solvents were removed with a rotary evaporator. Then the obtained residue was purified by silica gel column chromatography using a mixture of *n*-hexane and ethyl acetate (96: 4 (v/v)) as eluent to obtain 37.3 mg (75.74  $\mu$ mol) of **1ar** as white crystals in 83% yield.

**1ar**: m.p. 265.6-266.3°C.  $^1\text{H}$  NMR (400 MHz,  $\text{CDCl}_3$ , ppm)  $\delta$  8.34-8.31 (m, 4H), 7.63-7.56 (m, 6H).  $^{13}\text{C}$  NMR (100 MHz,  $\text{CDCl}_3$ , ppm)  $\delta$  173.9, 152.3, 132.5, 132.5, 129.4, 128.5, 115.5.  $^{19}\text{F}$  NMR (376 MHz,  $\text{CDCl}_3$ , ppm)  $\delta$  -111.2 (s, 4F), -132.3 (s, 2F). HRMS (MALDI, positive):  $m/z$  calcd. for  $\text{C}_{23}\text{H}_{10}\text{N}_2\text{F}_6\text{S}_2\text{Na}$   $[\text{M}+\text{Na}]^+$ : 515.00873, found: 515.00778. Anal. Calcd. for  $\text{C}_{23}\text{H}_{10}\text{N}_2\text{F}_6\text{S}_2$ : C, 56.10; H, 2.05; N, 5.69. Found: C, 55.94; H, 2.12; N, 5.59.

## 5. Preparation of **1ar**/PS composite films

To prepare the films, 100 mg of polystyrene (PS:  $(\text{C}_8\text{H}_8)_n$ ,  $n = 1600$ -1800) was added to 30 mL of chloroform, and the mixture was heated to dissolve PS. After that, 3 mL of the solution was taken, and **1ar** at 0.01 (0.1 wt%), 1.1 (10 wt%), 2.5 (20 wt%), 4.3 (30 wt%), 6.6 (40 wt%), or 10 mg (50 wt%) dissolved in 1 mL of chloroform was added to it and stirred for 5 min. Finally, the mixture was drop-cast onto a clean glass slide, left at room temperature for 2 h, and then dried in an oven (100°C) for 2 h.

The PS film was prepared under the same conditions as the **1ar**/PS composite film without the addition of **1ar**.

## Figures and Tables

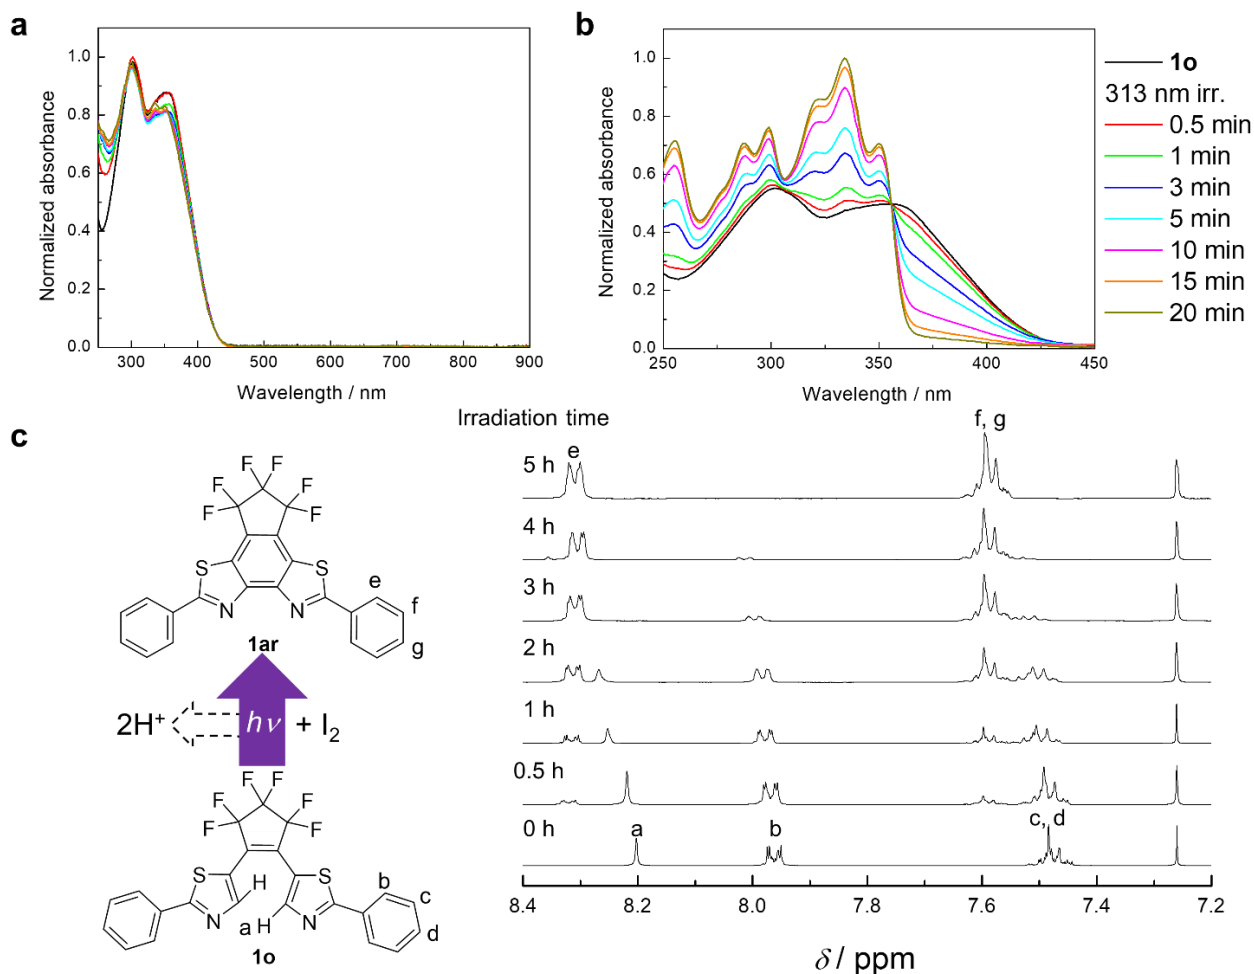

**Fig. S1** (a, b) Normalized absorption spectral changes of **1o** irradiated with UV light ( $\lambda = 313$  nm) in *n*-hexane. Measurements were carried out in the absence (a) and presence (b) of  $I_2$  (**1o**: 15  $\mu$ M,  $I_2$ : 0.01 M). The absorption band is blue-shifted due to the cleavage of the conjugated length in the molecule as the reaction of the fused ring proceeds. (c)  $^1H$  NMR spectral changes of **1o** irradiated with UV light ( $\lambda = 365$  nm,  $277$  mW  $cm^{-2}$ ) in the presence of  $I_2$  (**1o**: 3 mg +  $I_2$ : 3.1 mg in  $CDCl_3$ : 0.53 mL). These measurements were performed at room temperature.

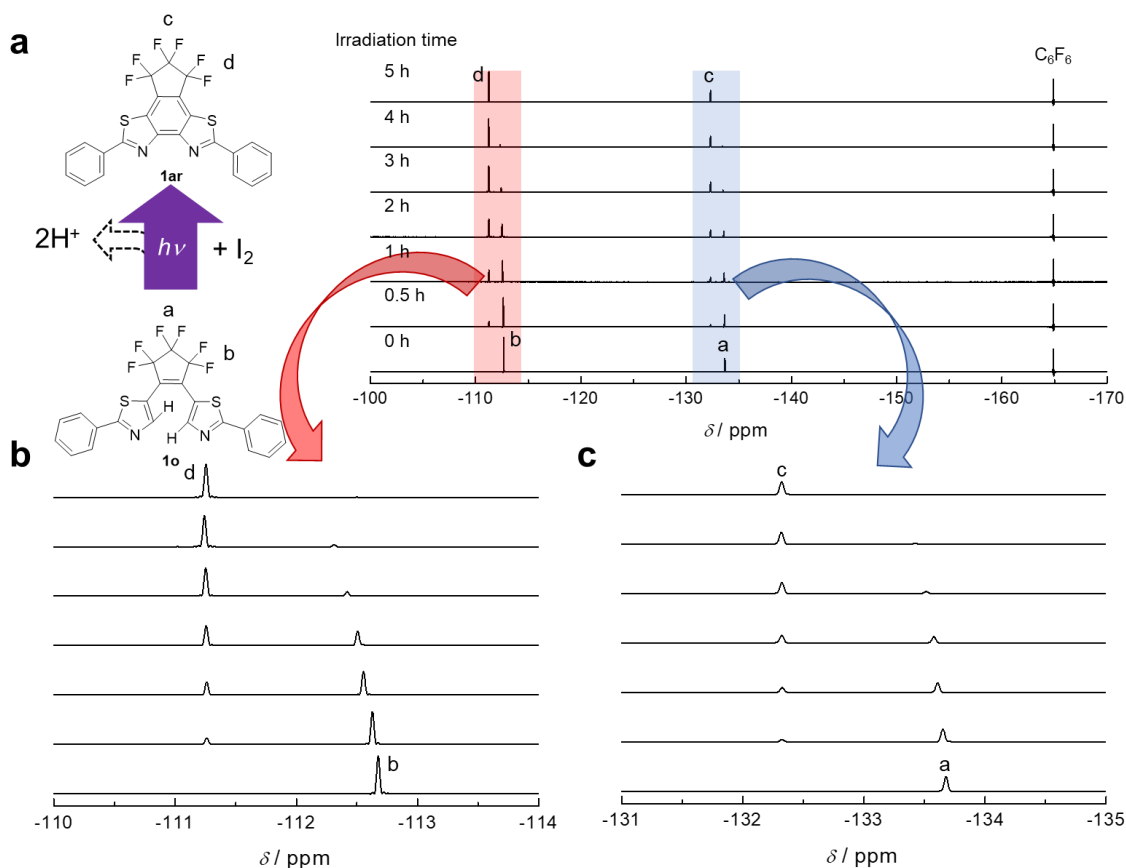

**Fig. S2**  $^{19}\text{F}$  NMR spectral changes of **1o** irradiated with UV light ( $\lambda = 365 \text{ nm}$ ,  $277 \text{ mW cm}^{-2}$ ) in the presence of  $\text{I}_2$  (**1o**: 3 mg +  $\text{I}_2$ : 3.1 mg in  $\text{CDCl}_3$ : 0.53 mL). These measurements were performed at room temperature.

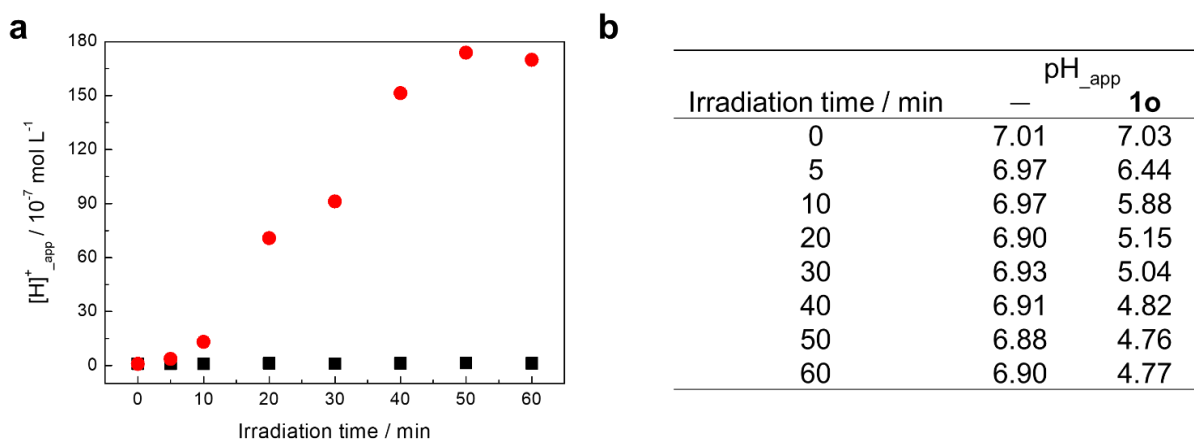

**Fig. S3** (a) Plots of apparent hydrogen-ion concentration ( $[\text{H}]^+_{\text{app}}$ ) vs. UV light ( $\lambda = 365 \text{ nm}$ ,  $810 \mu\text{W cm}^{-2}$ ) irradiation in the presence (red circle) or absence (black square) of **1o** in ethanol. (**1o**:  $5 \times 10^{-4} \text{ M}$ , tetrabutylammonium perchlorate (TBAP): 0.01 M). (b) Change in apparent pH ( $\text{pH}_{\text{app}}$ ) due to UV light irradiation in the presence or absence of **1o** measured using a pH meter. The apparent concentrations  $[\text{H}]^+_{\text{app}}$  were determined from the  $\text{pH}_{\text{app}}$  obtained from the measurements. These measurements were performed at room temperature.

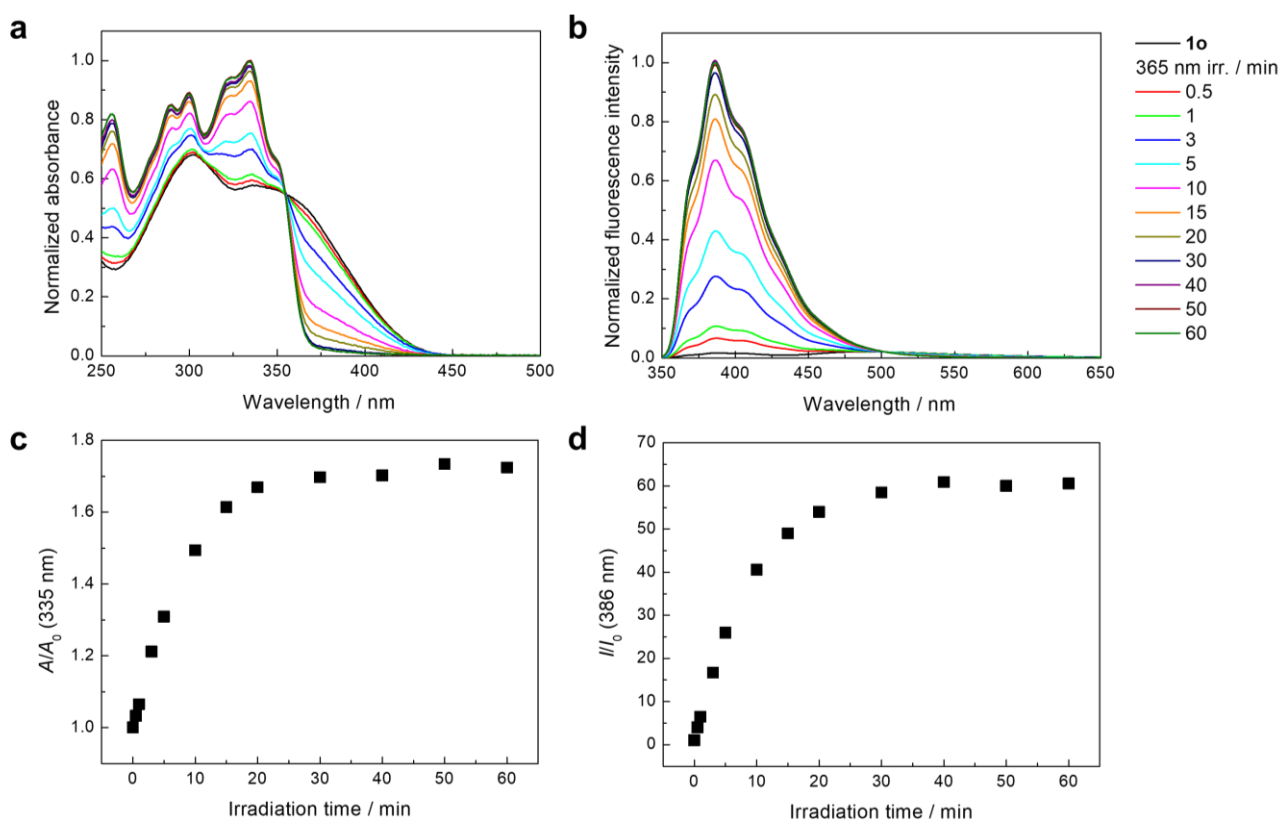

**Fig. S4** (a, b) Normalized absorption (a) and fluorescence (b) spectral changes of **1o** by UV light ( $\lambda = 365$  nm,  $810 \mu\text{W cm}^{-2}$ ) irradiation in ethanol in the presence of TBAP (**1o**:  $15 \mu\text{M}$ , TBAP:  $0.01$  M). The absorption band is blue-shifted due to the cleavage of the conjugated length in the molecule as the reaction of the fused ring proceeds. (c) Plots of  $A/A_0$  vs. UV light irradiation time of **1** at 335 nm in the presence of TBAP. Here,  $A_0$  is the absorption intensity of **1o** at 335 nm before UV light irradiation, and  $A$  is the absorption intensity of **1** at 335 nm for each irradiation time. (d) Plots of  $I/I_0$  vs. UV light irradiation time of **1** at 386 nm in the presence of TBAP. Here  $I_0$  is the fluorescence intensity of **1o** at 386 nm in the presence of TBAP without UV light irradiation, and  $I$  is the fluorescence intensity of **1** at 386 nm in the presence of TBAP for each irradiation time. As the ratio of **1ar** produced by irradiating **1o** with UV light increased, the fluorescence intensity increased. These measurements were performed at room temperature.

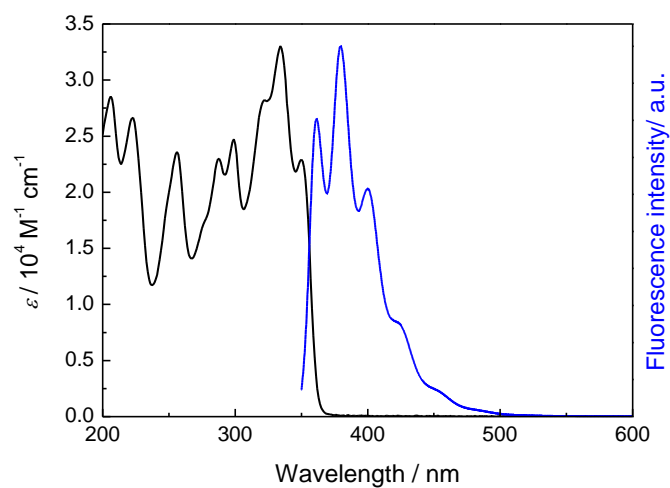

**Fig. S5** Absorption and fluorescence spectra of **1ar** in *n*-hexane ( $\lambda_{\text{exc}} = 336 \text{ nm}$ ). These measurements were performed at room temperature.

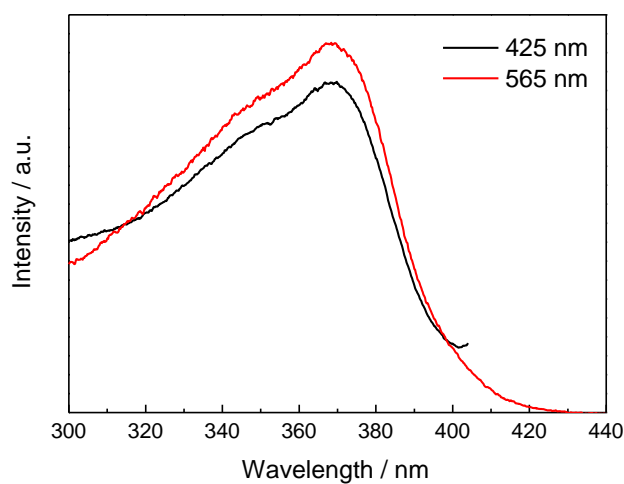

**Fig. S6** Excitation spectra of **1ar** crystals. Excitation wavelengths were scanned with the emission wavelengths at 425 and 565 nm. These measurements were performed at room temperature.

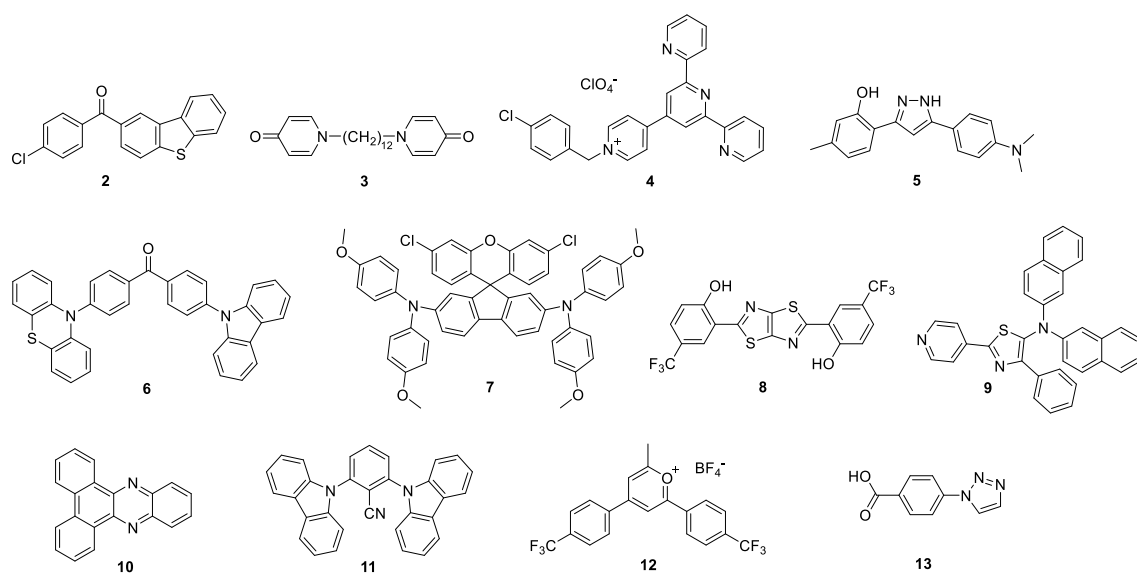

**Fig. S7** Some examples of reported single-molecule white light emitters in solid state.<sup>[S19-S30]</sup>

**Table S1.** Emission quantum yields ( $\Phi_{em}$ ) and CIE1931 coordinates at room temperature of single-molecule white light emitters in solid state.

| Compound                | $\Phi_{em}$ ( $\lambda_{exc}$ ) | CIE1931 coordinates (x, y)      | Emission composition                     | Ref. |
|-------------------------|---------------------------------|---------------------------------|------------------------------------------|------|
| <b>2</b>                | 0.072 (365 nm)                  | (0.33, 0.35)                    | Dual phosphorescence                     | S19  |
| <b>3</b>                | 0.32 (365 nm)                   | (0.34, 0.36)                    | Fluorescence<br>(monomer and excimer)    | S20  |
| <b>4</b>                | 0.12 (360 nm)                   | (0.32, 0.33)                    | Fluorescence<br>(monomer and CT)         | S21  |
| <b>5</b>                | 0.13 (No data)                  | (0.313, 0.339)                  | Fluorescence<br>(ESIPT)                  | S22  |
| <b>6</b>                | 0.23 (No data)                  | (0.35, 0.35)                    | Fluorescence<br>(AIE-DF)                 | S23  |
| <b>7</b> <sup>[a]</sup> | 0.0416 (365 nm)                 | (0.30, 0.30)                    | fluorescence<br>(monomer and excimer)    | S24  |
| <b>8</b>                | 0.27 (No data)                  | No data                         | Fluorescence<br>(ESIPT-excimer and MFC)  | S25  |
| <b>9</b> <sup>[b]</sup> | 0.07 (365 nm)                   | (0.32, 0.33)                    | Fluorescence<br>(MFC)                    | S26  |
| <b>10</b>               | 0.01 (390 nm)                   | (0.28, 0.33)                    | Fluorescence and dual<br>phosphorescence | S27  |
| <b>11</b>               | 0.238 (360 nm)                  | (0.3133, 0.3578) <sup>[c]</sup> | Fluorescence and<br>phosphorescence      | S28  |
| <b>12</b>               | 0.09 (340 nm)                   | (0.28, 0.36)                    | Fluorescence                             | S29  |
| <b>13</b>               | 0.0204 (320 nm)                 | (0.31, 0.35) <sup>[d]</sup>     | SAE                                      | S30  |

[a] A film produced by the spin-coating method. [b] After the powder was ground, acetone was fumed.

[c]  $\lambda_{ex} = 365$  nm. [d]  $\lambda_{ex} = 370$  nm.

Abbreviations for emission composition are: charge-transfer (CT), excited-state intramolecular proton transfer (ESIPT), aggregation-induced emission (AIE), delayed fluorescence (DF), mechanofluorochromism (MFC), and supramolecular aggregate emission (SAE), respectively.

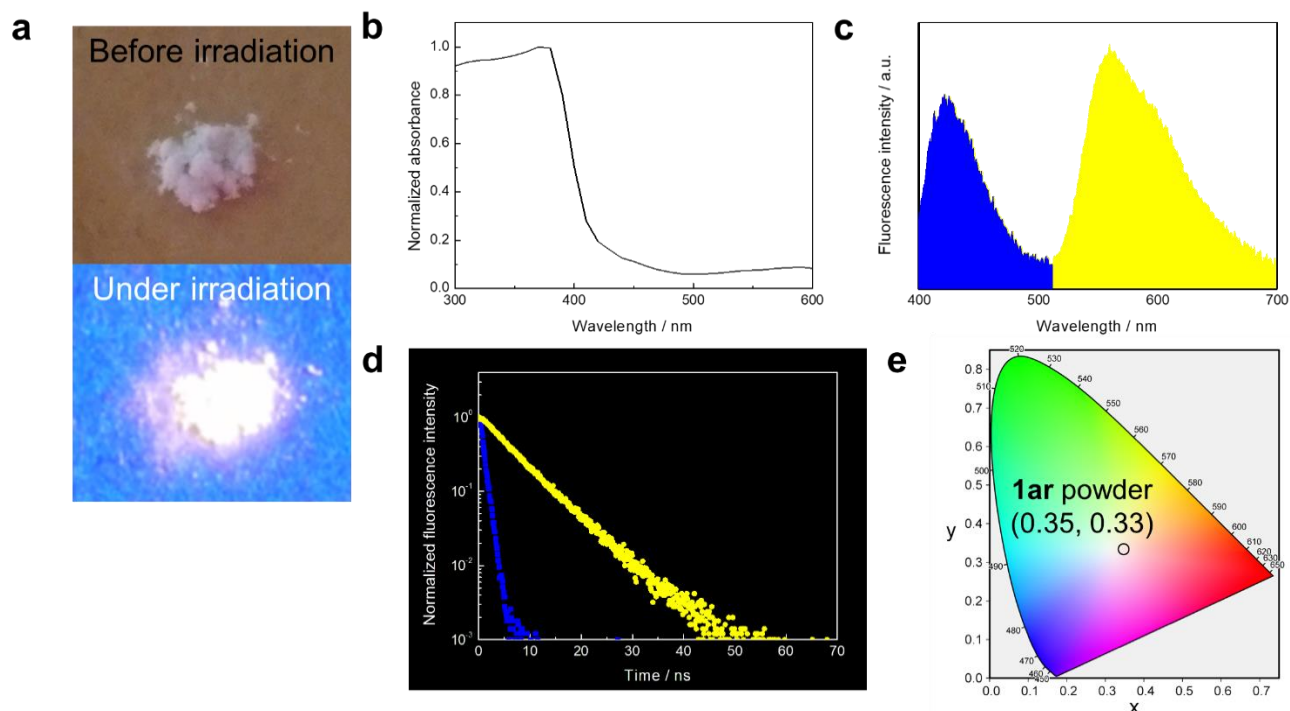

**Fig. S8** (a) Photographs of fluorescence emission of **1ar** powder before (top) and under UV light ( $\lambda = 365$  nm) irradiation (bottom). (b) Absorption spectrum of **1ar** powder. (c) Fluorescence spectrum of **1ar** powder ( $\lambda_{\text{exc}} = 340$  nm). (d) Fluorescence decay curves of **1ar** powder at 425 (blue square:  $\tau = 0.88$  ns) and 565 nm (yellow circle:  $\tau = 6.34$  ns) emission ( $\lambda_{\text{exc}} = 340$  nm). (e) CIE 1931 coordinates of emission of **1ar** powder ( $\lambda_{\text{exc}} = 340$  nm). These observations and measurements were performed at room temperature.

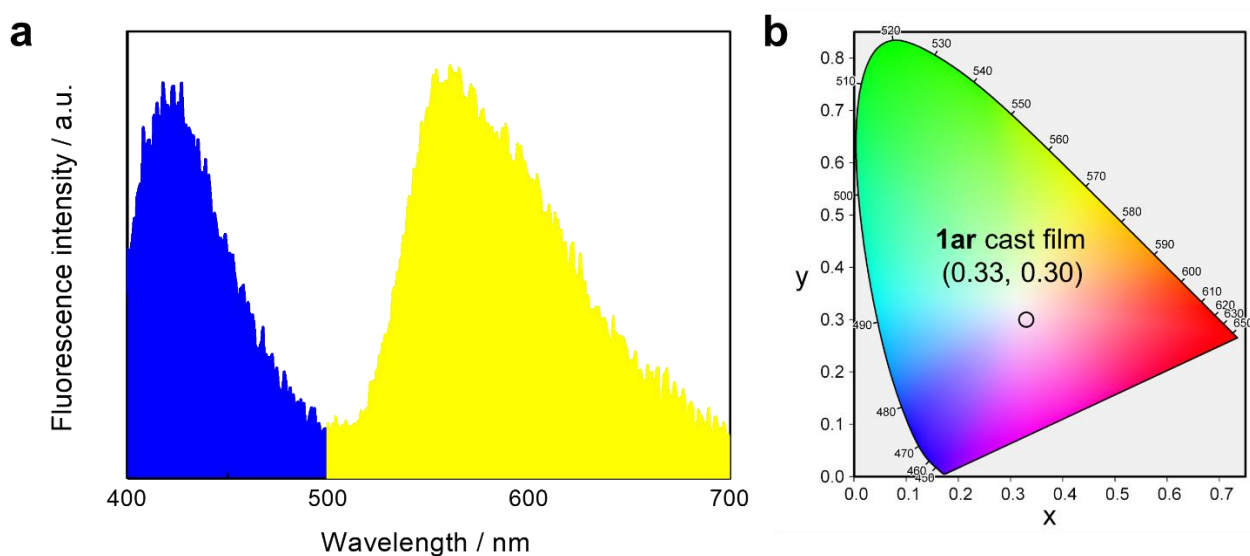

**Fig. S9** (a) Fluorescence spectrum of **1ar** cast film ( $\lambda_{\text{exc}} = 340$  nm). (b) CIE 1931 coordinates of emission of **1ar** cast film ( $\lambda_{\text{exc}} = 340$  nm). These measurements were performed at room temperature.



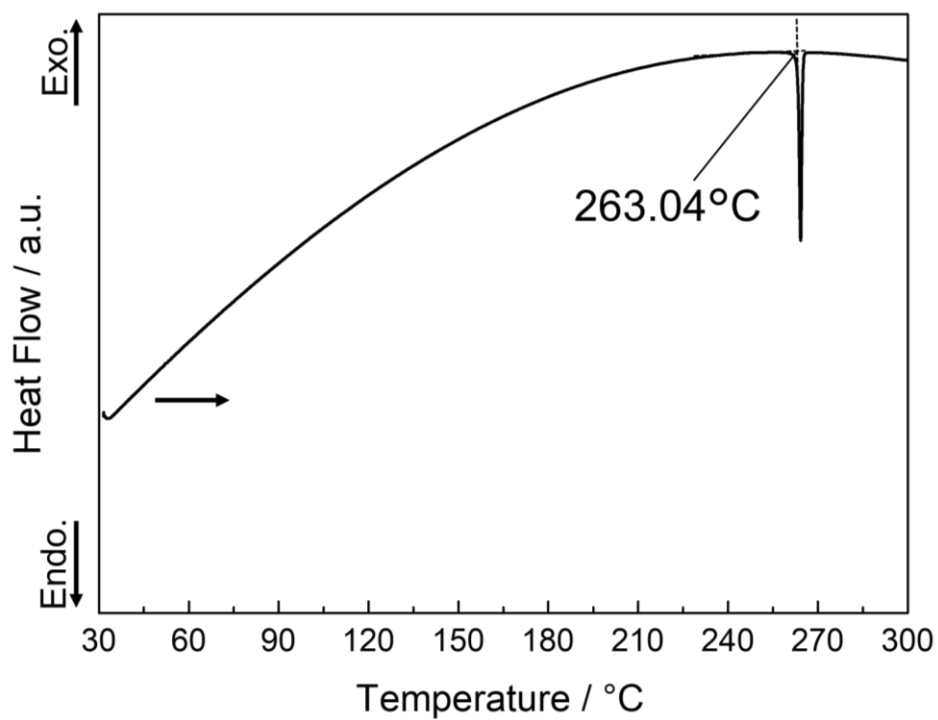

**Fig. S10** DSC curve of **1ar** crystals. DSC trace at heating rate of  $10\text{ °C min}^{-1}$ .

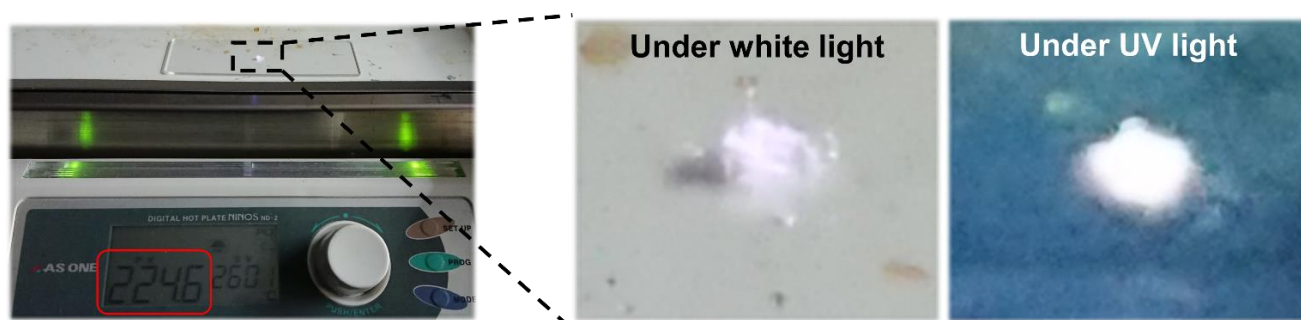

**Fig. S11** Photographs of **1ar** powder under white light and UV ( $\lambda = 365\text{ nm}$ ,  $277\text{ mW cm}^{-2}$ ) light irradiation at heating conditions above  $224\text{ °C}$ . The light was irradiated from directly above.

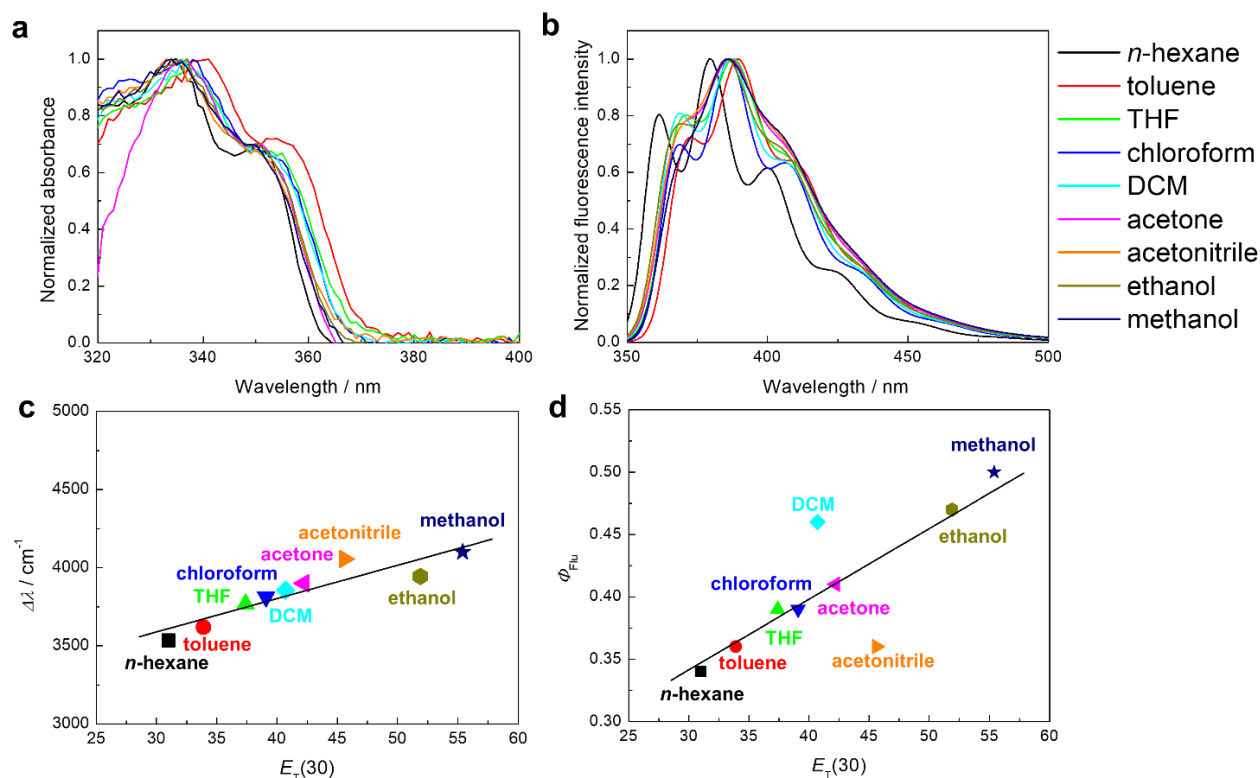

**Fig. S12** (a, b) Normalized absorption (a) and fluorescence (b) spectra of **1ar** in nine kinds of solvents ( $\lambda_{exc} = 336$  nm). (c) Plots of stokes shift vs.  $E_T(30)$  **1ar** in the nine solvents. (d) Plots of fluorescence quantum yield vs.  $E_T(30)$  of **1ar** in the nine solvents. These measurements were performed in dilute solution at room temperature.

**Table S2.** Optical properties of **1ar** in the nine kinds of solvents.

| Solvent          | $E_T(30)$<br>[kcal/mol] | $\lambda^{\max}_{Abs}$<br>[nm] | $\lambda^{\max}_{em}$<br>[nm] | $\Delta\lambda$ ( $\lambda^{\max}_{em} - \lambda^{\max}_{Abs}$ )<br>[nm] | $\Delta\lambda$ ( $\lambda^{\max}_{em} - \lambda^{\max}_{Abs}$ )<br>[ $\text{cm}^{-1}$ ] | $\Phi_{Flu}$ [a]<br>[%] |
|------------------|-------------------------|--------------------------------|-------------------------------|--------------------------------------------------------------------------|------------------------------------------------------------------------------------------|-------------------------|
| <i>n</i> -hexane | 31.0                    | 335                            | 380                           | 45                                                                       | 3535                                                                                     | 33.8                    |
| toluene          | 33.9                    | 341                            | 389                           | 48                                                                       | 3619                                                                                     | 36.2                    |
| THF              | 37.4                    | 337                            | 386                           | 49                                                                       | 3767                                                                                     | 38.8                    |
| chloroform       | 39.1                    | 338                            | 388                           | 50                                                                       | 3813                                                                                     | 39.3                    |
| DCM              | 40.7                    | 336                            | 386                           | 50                                                                       | 3855                                                                                     | 45.8                    |
| acetone          | 42.2                    | 337                            | 388                           | 51                                                                       | 3900                                                                                     | 40.9                    |
| acetonitrile     | 45.6                    | 333                            | 385                           | 52                                                                       | 4056                                                                                     | 36.4                    |
| ethanol          | 51.9                    | 335                            | 386                           | 51                                                                       | 3944                                                                                     | 47.1                    |
| methanol         | 55.4                    | 334                            | 387                           | 53                                                                       | 4100                                                                                     | 49.8                    |

[a]  $\lambda_{exc} = 336$  nm.

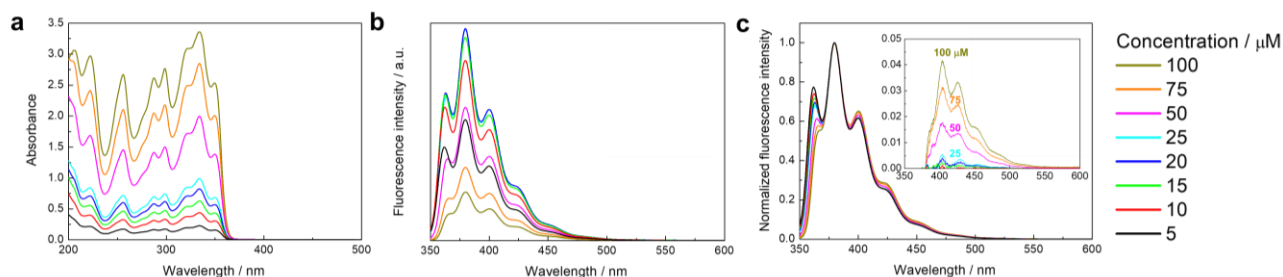

**Fig. S13** (a, b) Absorption (a) and fluorescence (b) spectral changes with different concentrations of **1ar** in *n*-hexane ( $\lambda_{\text{exc}} = 336$  nm). Absorbance increased with increasing concentration. Fluorescence intensity increased with increasing concentration from 5-20  $\mu\text{M}$ , but fluorescence intensity decreased with increasing concentration above 25  $\mu\text{M}$  due to concentration quenching. (c) Normalized fluorescence spectra with different concentrations of **1ar** in *n*-hexane. The difference spectra (inset) show the gradual appearance of red-shifted monomer emission due to intermolecular interactions with increasing concentration of **1ar**. The difference spectra were obtained from the difference between the spectra of 5  $\mu\text{M}$  and other concentrations of **1ar**. These measurements were performed at room temperature.

**Table S3.** Crystal data of **1ar** prepared by recrystallization from solution in hexane.

| <b>1ar</b>                  |                                                            |
|-----------------------------|------------------------------------------------------------|
| Formula                     | $\text{C}_{23}\text{H}_{10}\text{F}_6\text{N}_2\text{S}_2$ |
| Formula weight              | 492.45                                                     |
| $T / \text{K}$              | 100(2)                                                     |
| Crystal system              | triclinic                                                  |
| Space group                 | $P\bar{1}$                                                 |
| $a / \text{\AA}$            | 7.5038(2)                                                  |
| $b / \text{\AA}$            | 14.3528(5)                                                 |
| $c / \text{\AA}$            | 19.3127(7)                                                 |
| $\alpha / ^\circ$           | 77.5284(14)                                                |
| $\beta / ^\circ$            | 83.8844(13)                                                |
| $\gamma / ^\circ$           | 80.5922(13)                                                |
| $V / \text{\AA}^3$          | 1998.11(11)                                                |
| $Z$                         | 4                                                          |
| $R_1$ ( $I > 2\sigma(I)$ )  | 0.0277                                                     |
| $wR_2$ ( $I > 2\sigma(I)$ ) | 0.0690                                                     |
| $R_1$ (all data)            | 0.0345                                                     |
| $wR_2$ (all data)           | 0.0713                                                     |
| CCDC No.                    | 2159901                                                    |

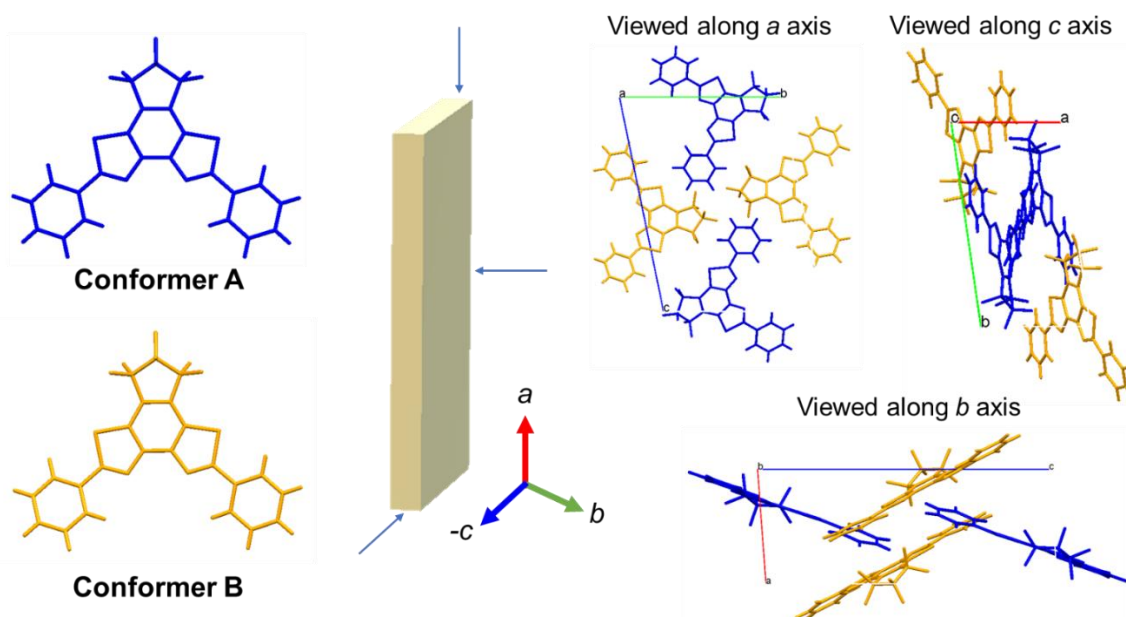

**Fig. S14** Molecular packing of **1ar** in the crystal. There are two conformers (A and B) with a 1:1 ratio of **1ar** molecules in crystal. Conformers A and B are shown in blue and bright yellow, respectively.

**Table S4.** Geometric parameters of crystal and optimized structures of **1ar**.

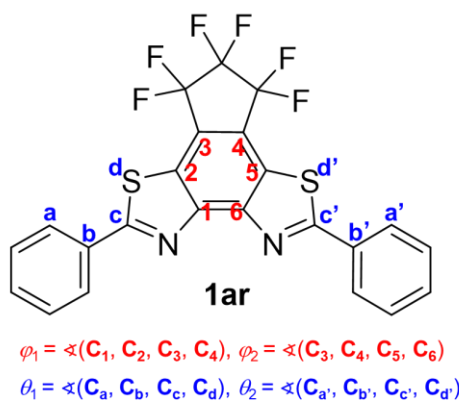

|                                 | Conformer A            |                          | Conformer B            |                          |
|---------------------------------|------------------------|--------------------------|------------------------|--------------------------|
|                                 | Crystal <sup>[a]</sup> | Optimized <sup>[b]</sup> | crystal <sup>[a]</sup> | Optimized <sup>[b]</sup> |
| $r_{\text{C}_1\text{-C}_6}$ [Å] | 1.416                  | 1.421                    | 1.419                  | 1.421                    |
| $\varphi_1$ [degree]            | 0.50                   | -0.4                     | 1.51                   | -0.4                     |
| $\varphi_2$ [degree]            | 0.31                   | 0.4                      | -1.89                  | 0.4                      |
| $\theta_1$ [degree]             | -0.48                  | 1.3                      | 9.68                   | 1.2                      |
| $\theta_2$ [degree]             | -13.02                 | -1.3                     | 4.28                   | -1.2                     |

[a] Geometric parameters of the crystal structure obtained from X-ray crystallographic analysis.

[b] Geometric parameters of optimized structure on the B3LYP/6-31G(d,p) level of theory.

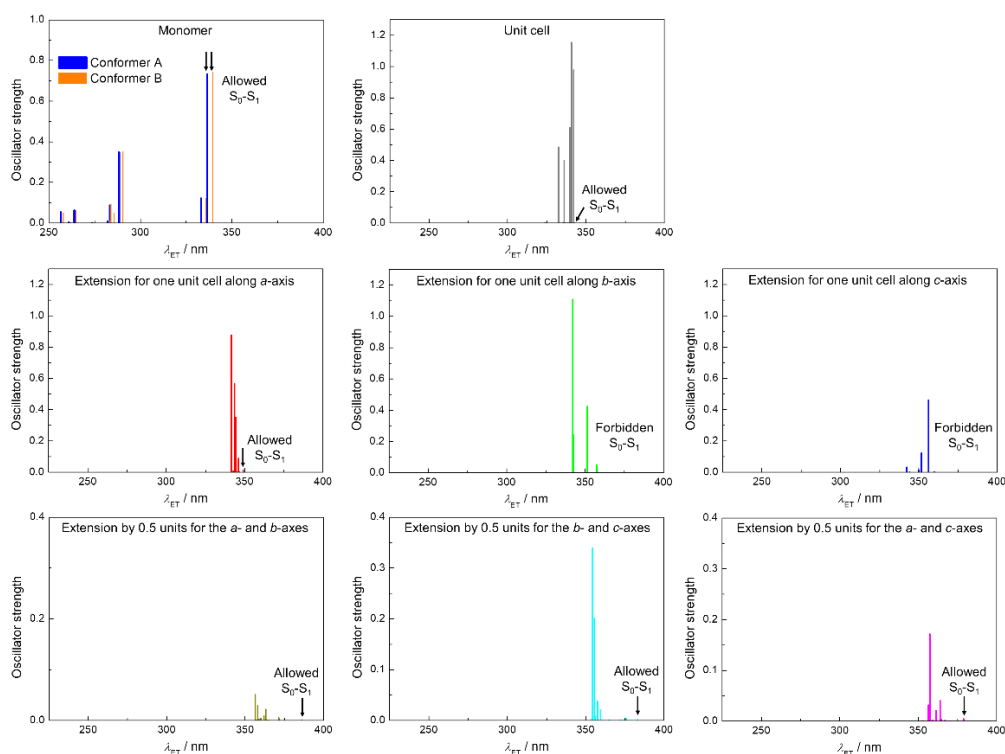

**Fig. S15** Electronic transitions estimated for a single molecule, unit cell, and large supercell of **1ar** with geometries of crystal structure obtained from X-ray crystallographic analysis using the TD-DFT method based on the B3LYP/6-31G(d,p) level of theory.

**Table S5.** Results of TD-DFT calculations of a single molecule and unit cell of **1ar** with geometries of crystal structure obtained from X-ray crystallographic analysis.

| Single molecule |                                                                                |                                                                               |                                                                                                                                                                                                                                                                                                                                                              |
|-----------------|--------------------------------------------------------------------------------|-------------------------------------------------------------------------------|--------------------------------------------------------------------------------------------------------------------------------------------------------------------------------------------------------------------------------------------------------------------------------------------------------------------------------------------------------------|
| Excited states  | Conformer A                                                                    | Conformer B                                                                   | Unit cell                                                                                                                                                                                                                                                                                                                                                    |
| $1^{\text{st}}$ | 336.44 nm (3.69 eV)<br>$f = 0.7323$<br>HOMO→LUMO: 0.70                         | 339.47 nm (3.65 eV)<br>$f = 0.7436$<br>HOMO→LUMO: 0.70                        | 342.69 nm (3.62 eV)<br>$f = 0.0005$<br>HOMO-7→LUMO+1: -0.14<br>HOMO-6→LUMO: -0.14<br>HOMO-3→LUMO: 0.22<br>HOMO-3→LUMO+1: -0.15<br>HOMO-2→LUMO: -0.16<br>HOMO-2→LUMO+1: -0.22<br>HOMO-1→LUMO: -0.16<br>HOMO-1→LUMO+1: 0.23<br>HOMO-1→LUMO+2: 0.16<br>HOMO-1→LUMO+3: -0.18<br>HOMO→LUMO: 0.25<br>HOMO→LUMO+1: 0.15<br>HOMO→LUMO+2: -0.19<br>HOMO→LUMO+3: -0.17 |
| $2^{\text{nd}}$ | 333.14 nm (3.72 eV)<br>$f = 0.1214$<br>HOMO-1→LUMO: 0.66<br>HOMO→LUMO+1: -0.22 | 335.90 nm (3.69 eV)<br>$f = 0.1210$<br>HOMO-1→LUMO: 0.66<br>HOMO→LUMO+1: 0.22 | 342.27 nm (3.62 eV)<br>$f = 0.9779$<br>HOMO-3→LUMO+1: 0.16<br>HOMO-2→LUMO: -0.15                                                                                                                                                                                                                                                                             |

|                 |                                                                                                                                |                                                                                                                                                    |                                                                                                                                                                                                                                                                                            |
|-----------------|--------------------------------------------------------------------------------------------------------------------------------|----------------------------------------------------------------------------------------------------------------------------------------------------|--------------------------------------------------------------------------------------------------------------------------------------------------------------------------------------------------------------------------------------------------------------------------------------------|
|                 | HOMO→LUMO+2: -0.10                                                                                                             | HOMO→LUMO+2: 0.10                                                                                                                                  | HOMO-1→LUMO: 0.23<br>HOMO-1→LUMO+1: -0.27<br>HOMO-1→LUMO+2: -0.21<br>HOMO-1→LUMO+3: 0.19<br>HOMO→LUMO: 0.27<br>HOMO→LUMO+1: 0.21<br>HOMO→LUMO+2: -0.18<br>HOMO→LUMO+3: -0.20                                                                                                               |
| 3 <sup>rd</sup> | 288.38 nm (4.30 eV)<br>$f = 0.3492$<br>HOMO-2→LUMO: 0.17<br>HOMO-1→LUMO: 0.21<br>HOMO→LUMO+1: 0.64                             | 290.51 nm (4.27 eV)<br>$f = 0.3507$<br>HOMO-2→LUMO: -0.15<br>HOMO-1→LUMO: -0.21<br>HOMO→LUMO+1: 0.65                                               | 340.97 nm (3.64 eV)<br>$f = 0.0014$<br>HOMO-3→LUMO: -0.25<br>HOMO-3→LUMO+1: 0.16<br>HOMO-2→LUMO: 0.18<br>HOMO-2→LUMO+1: 0.25<br>HOMO-1→LUMO: -0.19<br>HOMO-1→LUMO+1: 0.31<br>HOMO→LUMO: 0.32<br>HOMO→LUMO+1: 0.21                                                                          |
| 4 <sup>th</sup> | 283.68 nm (4.37 eV)<br>$f = 0.0635$<br>HOMO-3→LUMO: -0.30<br>HOMO-2→LUMO: 0.20<br>HOMO-1→LUMO+1: 0.58                          | 285.79 nm (4.34 eV)<br>$f = 0.0480$<br>HOMO-3→LUMO: 0.16<br>HOMO-1→LUMO+1: 0.67                                                                    | 340.63 nm (3.64 eV)<br>$f = 1.1552$<br>HOMO-3→LUMO+1: 0.18<br>HOMO-2→LUMO: -0.17<br>HOMO-1→LUMO: 0.21<br>HOMO-1→LUMO+1: 0.28<br>HOMO-1→LUMO+2: -0.23<br>HOMO-1→LUMO+3: 0.21<br>HOMO→LUMO: -0.25<br>HOMO→LUMO+1: -0.21<br>HOMO→LUMO+2: -0.21<br>HOMO→LUMO+3: -0.22                          |
| 5 <sup>th</sup> | 283.33 nm (4.38 eV)<br>$f = 0.0869$<br>HOMO-3→LUMO+1: -0.12<br>HOMO-2→LUMO: 0.61<br>HOMO-1→LUMO+1: -0.21<br>HOMO→LUMO+1: -0.14 | 283.89 nm (4.37 eV)<br>$f = 0.0925$<br>HOMO-4→LUMO+1: 0.13<br>HOMO-2→LUMO: 0.64<br>HOMO-1→LUMO+4: -0.10<br>HOMO→LUMO+1: 0.12<br>HOMO→LUMO+5: -0.10 | 339.74 nm (3.65 eV)<br>$f = 0.6105$<br>HOMO-3→LUMO: 0.11<br>HOMO-3→LUMO+1: -0.40<br>HOMO-2→LUMO: 0.40<br>HOMO-2→LUMO+1: 0.11<br>HOMO-1→LUMO+2: -0.18<br>HOMO-1→LUMO+3: 0.17<br>HOMO→LUMO+2: -0.17<br>HOMO→LUMO+3: -0.19                                                                    |
| 6 <sup>th</sup> | 282.03 nm (4.40 eV)<br>$f = 0.0077$<br>HOMO-3→LUMO: 0.59<br>HOMO-2→LUMO+1: -0.11<br>HOMO-1→LUMO+1: 0.32<br>HOMO→LUMO+4: 0.10   | 283.19 nm (4.38 eV)<br>$f = 0.0080$<br>HOMO-3→LUMO: 0.64<br>HOMO-2→LUMO+1: 0.13<br>HOMO-1→LUMO+1: -0.17<br>HOMO→LUMO+4: 0.12                       | 338.62 nm (3.66 eV)<br>$f = 0.0000$<br>HOMO-7→LUMO+1: 0.19<br>HOMO-6→LUMO: 0.19<br>HOMO-3→LUMO: 0.23<br>HOMO-3→LUMO+1: -0.16<br>HOMO-2→LUMO: -0.16<br>HOMO-2→LUMO+1: -0.23<br>HOMO-1→LUMO+1: 0.13<br>HOMO+1→LUMO+2: -0.22<br>HOMO-1→LUMO+3: 0.25<br>HOMO→LUMO+2: 0.24<br>HOMO→LUMO+3: 0.21 |
| 7 <sup>th</sup> | 273.49 nm (4.53 eV)<br>$f = 0.0006$<br>HOMO-7→LUMO+1: -0.16                                                                    | 274.17 nm (4.52 eV)<br>$f = 0.0016$<br>HOMO-7→LUMO+1: -0.16                                                                                        | 337.00 nm (3.68 eV)<br>$f = 0.0002$<br>HOMO→LUMO: -0.41                                                                                                                                                                                                                                    |

|                  |                                                                                                                                                         |                                                                                                                                                          |                                                                                                                                                                                                                                                                                 |
|------------------|---------------------------------------------------------------------------------------------------------------------------------------------------------|----------------------------------------------------------------------------------------------------------------------------------------------------------|---------------------------------------------------------------------------------------------------------------------------------------------------------------------------------------------------------------------------------------------------------------------------------|
|                  | HOMO-6→LUMO: 0.68                                                                                                                                       | HOMO-6→LUMO: 0.68                                                                                                                                        | HOMO→LUMO+1: 0.56                                                                                                                                                                                                                                                               |
| 8 <sup>th</sup>  | 263.83 nm (4.70 eV)<br><i>f</i> = 0.0624<br>HOMO-7→LUMO: 0.12<br>HOMO-4→LUMO: 0.62<br>HOMO-1→LUMO: 0.10<br>HOMO→LUMO+2: 0.25                            | 264.92 nm (4.68 eV)<br><i>f</i> = 0.0628<br>HOMO-7→LUMO: 0.12<br>HOMO-4→LUMO: 0.62<br>HOMO-1→LUMO: -0.11<br>HOMO→LUMO+2: 0.26                            | 336.99 nm (3.68 eV)<br><i>f</i> = 0.0002<br>HOMO-1→LUMO: 0.57<br>HOMO-1→LUMO+1: 0.40                                                                                                                                                                                            |
| 9 <sup>th</sup>  | 260.89 nm (4.75 eV)<br><i>f</i> = 0.0027<br>HOMO-7→LUMO: 0.62<br>HOMO-6→LUMO+1: -0.29<br>HOMO-4→LUMO: -0.11                                             | 261.83 nm (4.74 eV)<br><i>f</i> = 0.0024<br>HOMO-7→LUMO: 0.63<br>HOMO-6→LUMO+1: -0.29<br>HOMO-4→LUMO: -0.11                                              | 336.11 nm (3.69 eV)<br><i>f</i> = 0.4000<br>HOMO-7→LUMO: 0.40<br>HOMO-7→LUMO+1: -0.18<br>HOMO-6→LUMO: 0.18<br>HOMO-6→LUMO+1: 0.40<br>HOMO-3→LUMO+1: 0.12<br>HOMO-3→LUMO+5: -0.13<br>HOMO-2→LUMO: -0.12<br>HOMO-2→LUMO+4: 0.13                                                   |
| 10 <sup>th</sup> | 256.42 nm (4.84 eV)<br><i>f</i> = 0.0535<br>HOMO-5→LUMO: 0.65<br>HOMO-1→LUMO+2: -0.21                                                                   | 257.77 nm (4.81 eV)<br><i>f</i> = 0.0503<br>HOMO-5→LUMO: 0.65<br>HOMO-1→LUMO+2: 0.20                                                                     | 335.24 nm (3.70 eV)<br><i>f</i> = 0.0000<br>HOMO-7→LUMO+1: 0.37<br>HOMO-6→LUMO: 0.37<br>HOMO-5→LUMO+2: 0.17<br>HOMO-4→LUMO+3: -0.17<br>HOMO-3→LUMO+4: -0.12<br>HOMO-2→LUMO+5: 0.12<br>HOMO-1→LUMO+2: 0.13<br>HOMO-1→LUMO+3: -0.15<br>HOMO→LUMO+2: -0.15<br>HOMO→LUMO+3: -0.13   |
| 11 <sup>th</sup> | 248.60 nm (4.99 eV)<br><i>f</i> = 0.0010<br>HOMO-3→LUMO: 0.19<br>HOMO-2→LUMO+1: 0.60<br>HOMO-1→LUMO+2: -0.19<br>HOMO→LUMO+3: 0.10<br>HOMO→LUMO+4: -0.15 | 249.06 nm (4.98 eV)<br><i>f</i> = 0.0019<br>HOMO-3→LUMO: -0.20<br>HOMO-2→LUMO+1: 0.59<br>HOMO-1→LUMO+2: -0.20<br>HOMO→LUMO+4: 0.17                       | 332.50 nm (3.73 eV)<br><i>f</i> = 0.4846<br>HOMO-5→LUMO+2: 0.14<br>HOMO-5→LUMO+3: -0.43<br>HOMO-4→LUMO+2: 0.43<br>HOMO-4→LUMO+3: 0.15<br>HOMO-1→LUMO+6: -0.10<br>HOMO-1→LUMO+7: 0.11<br>HOMO→LUMO+6: 0.11<br>HOMO→LUMO+7: 0.10                                                  |
| 12 <sup>th</sup> | 247.58 nm (5.01 eV)<br><i>f</i> = 0.0015<br>HOMO-3→LUMO+1: 0.59<br>HOMO-2→LUMO: 0.19<br>HOMO-1→LUMO+4: 0.14<br>HOMO→LUMO+2: 0.20<br>HOMO→LUMO+5: -0.16  | 248.16 nm (5.00 eV)<br><i>f</i> = 0.0019<br>HOMO-3→LUMO+1: 0.58<br>HOMO-2→LUMO: -0.20<br>HOMO-1→LUMO+4: -0.13<br>HOMO→LUMO+2: 0.20<br>HOMO→LUMO+5: -0.17 | 332.13 nm (3.73 eV)<br><i>f</i> = 0.0001<br>HOMO-7→LUMO+1: -0.11<br>HOMO-6→LUMO: -0.11<br>HOMO-5→LUMO+2: 0.39<br>HOMO-5→LUMO+3: -0.15<br>HOMO-4→LUMO+2: -0.13<br>HOMO-4→LUMO+3: -0.39<br>HOMO-1: LUMO+2: -0.11<br>HOMO-1→LUMO+3: 0.13<br>HOMO→LUMO+2: 0.13<br>HOMO→LUMO+3: 0.11 |
| 13 <sup>th</sup> | 240.46 nm (5.16 eV)<br><i>f</i> = 0.1522<br>HOMO-5→LUMO: 0.15<br>HOMO-4→LUMO+1: 0.24                                                                    | 241.50 nm (5.13 eV)<br><i>f</i> = 0.1437<br>HOMO-5→LUMO: -0.14<br>HOMO-4→LUMO+1: -0.23                                                                   | 324.06 nm (3.83 eV)<br><i>f</i> = 0.0012<br>HOMO-5→LUMO: -0.21<br>HOMO-5→LUMO+1: -0.22                                                                                                                                                                                          |

|                  |                                          |                                          |                                          |
|------------------|------------------------------------------|------------------------------------------|------------------------------------------|
|                  | HOMO-2→LUMO+1: 0.16                      | HOMO-2→LUMO+1: 0.17                      | HOMO-4→LUMO: 0.51                        |
|                  | HOMO-1→LUMO+2: 0.50                      | HOMO-1→LUMO+2: 0.49                      | HOMO-4→LUMO+1: 0.33                      |
|                  | HOMO→LUMO+3: -0.31                       | HOMO→LUMO+3: 0.33                        |                                          |
|                  | HOMO→LUMO+4: -0.13                       | HOMO→LUMO+4: 0.52                        |                                          |
| 14 <sup>th</sup> | 240.15 nm (5.16 eV)<br><i>f</i> = 0.0071 | 241.19 nm (5.14 eV)<br><i>f</i> = 0.0105 | 324.04 nm (3.83 eV)<br><i>f</i> = 0.0008 |
|                  | HOMO-4→LUMO: -0.25                       | HOMO-4→LUMO: -0.25                       | HOMO-5→LUMO: -0.38                       |
|                  | HOMO-3→LUMO+1: -0.17                     | HOMO-3→LUMO+1: -0.19                     | HOMO-5→LUMO+1: 0.48                      |
|                  | HOMO-1→LUMO+3: 0.28                      | HOMO-1→LUMO+3: -0.29                     | HOMO-4→LUMO: -0.13                       |
|                  | HOMO→LUMO+2: 0.54                        | HOMO→LUMO+2: 0.52                        | HOMO-4→LUMO+1: 0.28                      |
| 15 <sup>th</sup> | 232.00 nm (5.34 eV)<br><i>f</i> = 0.0010 | 232.45 nm (5.33 eV)<br><i>f</i> = 0.0094 | 323.41 nm (3.83 eV)<br><i>f</i> = 0.0000 |
|                  | HOMO-7→LUMO: 0.30                        | HOMO-7→LUMO: 0.29                        | HOMO-5→LUMO: 0.18                        |
|                  | HOMO-6→LUMO+1: 0.63                      | HOMO-6→LUMO+1: 0.62                      | HOMO-5→LUMO+1: -0.24                     |
|                  |                                          | HOMO-4→LUMO+1: 0.11                      | HOMO-4→LUMO: -0.36                       |
|                  |                                          |                                          | HOMO-4→LUMO+1: 0.51                      |

**Table S6.** Results of TD-DFT calculations of the large supercell extended by one unit cell along one axis of **1ar** with geometries of crystal structure obtained from X-ray crystallographic analysis.

| Extension for one unit cell along one axis |                                          |                                          |                                          |
|--------------------------------------------|------------------------------------------|------------------------------------------|------------------------------------------|
| Excited states                             | <i>a</i>                                 | <i>b</i>                                 | <i>c</i>                                 |
| 1 <sup>st</sup>                            | 349.18 nm (3.55 eV)<br><i>f</i> = 0.0121 | 380.26 nm (3.26 eV)<br><i>f</i> = 0.0000 | 374.73 nm (3.31 eV)<br><i>f</i> = 0.0000 |
|                                            | HOMO-1→LUMO: -0.16                       | HOMO-2→LUMO: -0.20                       | HOMO→LUMO+2: 0.70                        |
|                                            | HOMO→LUMO: 0.67                          | HOMO→LUMO: 0.67                          |                                          |
| 2 <sup>nd</sup>                            | 349.15 nm (3.55 eV)<br><i>f</i> = 0.0098 | 357.78 nm (3.47 eV)<br><i>f</i> = 0.0236 | 359.76 nm (3.45 eV)<br><i>f</i> = 0.0015 |
|                                            | HOMO-1→LUMO+1: 0.67                      | HOMO-11→LUMO: 0.21                       | HOMO→LUMO: 0.49                          |
|                                            | HOMO→LUMO+2: 0.16                        | HOMO-5→LUMO: -0.37                       | HOMO→LUMO+1: 0.51                        |
|                                            |                                          | HOMO-1→LUMO: 0.34                        |                                          |
|                                            |                                          | HOMO→LUMO+5: 0.42                        |                                          |
| 3 <sup>rd</sup>                            | 346.58 nm (3.58 eV)<br><i>f</i> = 0.0000 | 357.31 nm (3.47 eV)<br><i>f</i> = 0.0515 | 359.73 nm (3.45 eV)<br><i>f</i> = 0.0001 |
|                                            | HOMO-9→LUMO+1: 0.12                      | HOMO-5→LUMO: 0.29                        | HOMO→LUMO: 0.50                          |
|                                            | HOMO-8→LUMO: 0.12                        | HOMO-4→LUMO: -0.13                       | HOMO→LUMO+1: -0.49                       |
|                                            | HOMO-5→LUMO+2: 0.12                      | HOMO-2→LUMO: 0.11                        |                                          |
|                                            | HOMO-5→LUMO+3: 0.29                      | HOMO-1→LUMO: 0.57                        |                                          |
|                                            | HOMO-4→LUMO+2: 0.30                      | HOMO→LUMO+5: -0.17                       |                                          |
|                                            | HOMO-4→LUMO+3: -0.11                     |                                          |                                          |
|                                            | HOMO-3→LUMO+2: 0.18                      |                                          |                                          |
|                                            | HOMO-3→LUMO+3: -0.10                     |                                          |                                          |
|                                            | HOMO-3→LUMO+4: 0.25                      |                                          |                                          |
|                                            | HOMO-2→LUMO+2: -0.11                     |                                          |                                          |
|                                            | HOMO-2→LUMO+3: -0.15                     |                                          |                                          |
|                                            | HOMO-2→LUMO+5: 0.25                      |                                          |                                          |
|                                            | HOMO→LUMO+7: -0.10                       |                                          |                                          |



|                 |                                                                                                                                                                                                                                                                                                                                                 |                                                                                                                                                    |                                                                                                                                                                            |
|-----------------|-------------------------------------------------------------------------------------------------------------------------------------------------------------------------------------------------------------------------------------------------------------------------------------------------------------------------------------------------|----------------------------------------------------------------------------------------------------------------------------------------------------|----------------------------------------------------------------------------------------------------------------------------------------------------------------------------|
| 4 <sup>th</sup> | 346.05 nm (3.58 eV)<br>$f = 0.0873$<br>HOMO-9→LUMO+1: -0.16<br>HOMO-8→LUMO: 0.16<br>HOMO-5→LUMO+2: 0.27<br>HOMO-5→LUMO+3: -0.13<br>HOMO-4→LUMO+2: 0.13<br>HOMO-4→LUMO+3: 0.28<br>HOMO-3→LUMO+3: 0.21<br>HOMO-3→LUMO+5: -0.19<br>HOMO-2→LUMO+2: -0.22<br>HOMO-2→LUMO+4: -0.19<br>HOMO-1→LUMO+6: 0.10<br>HOMO-1→LUMO+7: 0.13<br>HOMO→LUMO+6: 0.13 | 357.26 nm (3.47 eV)<br>$f = 0.0023$<br>HOMO-3→LUMO: 0.15<br>HOMO-2→LUMO: 0.65<br>HOMO→LUMO: 0.18                                                   | 356.10 nm (3.48 eV)<br>$f = 0.4611$<br>HOMO-7→LUMO+2: 0.16<br>HOMO-1→LUMO+2: 0.62<br>HOMO→LUMO+7: -0.25                                                                    |
| 5 <sup>th</sup> | 345.04 nm (3.59 eV)<br>$f = 0.0000$<br>HOMO-5→LUMO+3: 0.18<br>HOMO-4→LUMO+2: 0.19<br>HOMO-3→LUMO+4: -0.16<br>HOMO-2→LUMO+5: -0.16<br>HOMO-1→LUMO+6: 0.35<br>HOMO-1→LUMO+7: 0.17<br>HOMO→LUMO+6: -0.17<br>HOMO→LUMO+7: 0.35                                                                                                                      | 351.39 nm (3.53 eV)<br>$f = 0.4241$<br>HOMO-11→LUMO: 0.30<br>HOMO-5→LUMO: 0.47<br>HOMO-2→LUMO+5: -0.11<br>HOMO-1→LUMO: -0.12<br>HOMO→LUMO+5: 0.35  | 353.25 nm (3.51 eV)<br>$f = 0.0000$<br>HOMO-4→LUMO+2: 0.16<br>HOMO-2→LUMO+2: 0.66                                                                                          |
| 6 <sup>th</sup> | 344.23 nm (3.60 eV)<br>$f = 0.3505$<br>HOMO-3→LUMO+2: -0.11<br>HOMO-3→LUMO+3: -0.35<br>HOMO-2→LUMO+2: 0.39<br>HOMO-1→LUMO+6: 0.17<br>HOMO-1→LUMO+7: 0.22<br>HOMO→LUMO+6: 0.22<br>HOMO→LUMO+7: -0.17                                                                                                                                             | 349.10 nm (3.55 eV)<br>$f = 0.0001$<br>HOMO-3→LUMO+1: 0.11<br>HOMO-2→LUMO+1: 0.40<br>HOMO-1→LUMO+1: 0.50<br>HOMO→LUMO+1: 0.24                      | 351.83 nm (3.52 eV)<br>$f = 0.1221$<br>HOMO-7→LUMO+2: 0.61<br>HOMO-2→LUMO+1: -0.11<br>HOMO-1→LUMO: -0.15<br>HOMO-1→LUMO+2: -0.18<br>HOMO→LUMO+7: -0.14                     |
| 7 <sup>th</sup> | 344.03 nm (3.60 eV)<br>$f = 0.0029$<br>HOMO-9→LUMO+1: 0.11<br>HOMO-8→LUMO: 0.11<br>HOMO-5→LUMO+3: 0.19<br>HOMO-4→LUMO+2: 0.19<br>HOMO-3→LUMO+2: -0.35<br>HOMO-3→LUMO+3: 0.24<br>HOMO-2→LUMO+2: 0.22<br>HOMO-2→LUMO+3: 0.39                                                                                                                      | 349.07 nm (3.55 eV)<br>$f = 0.0001$<br>HOMO-4→LUMO+2: -0.11<br>HOMO-2→LUMO+2: -0.45<br>HOMO-1→LUMO+2: 0.45<br>HOMO→LUMO+2: -0.24                   | 351.40 nm (3.53 eV)<br>$f = 0.0002$<br>HOMO-2→LUMO: 0.37<br>HOMO-2→LUMO+1: -0.16<br>HOMO-1→LUMO: 0.30<br>HOMO-1→LUMO+1: 0.47                                               |
| 8 <sup>th</sup> | 343.68 nm (3.61 eV)<br>$f = 0.5650$<br>HOMO-9→LUMO+1: -0.13<br>HOMO-8→LUMO: 0.12<br>HOMO-5→LUMO+2: 0.25<br>HOMO-5→LUMO+3: -0.13<br>HOMO-4→LUMO+2: 0.12<br>HOMO-4→LUMO+3: 0.26<br>HOMO-3→LUMO+3: -0.19<br>HOMO-2→LUMO+2: 0.20<br>HOMO-1→LUMO+6: -0.18<br>HOMO-1→LUMO+7: -0.24<br>HOMO→LUMO+6: -0.23<br>HOMO→LUMO+7: 0.18                         | 348.71 nm (3.56 eV)<br>$f = 0.0007$<br>HOMO-2→LUMO+2: 0.12<br>HOMO-2→LUMO+3: -0.14<br>HOMO→LUMO+2: -0.14<br>HOMO→LUMO+3: 0.63<br>HOMO→LUMO+4: 0.19 | 351.36 nm (3.53 eV)<br>$f = 0.0170$<br>HOMO-7→LUMO+2: 0.19<br>HOMO-2→LUMO: 0.15<br>HOMO-2→LUMO+1: 0.36<br>HOMO-1→LUMO: 0.44<br>HOMO-1→LUMO+1: -0.29<br>HOMO-1→LUMO+2: 0.12 |

|                  |                                                                                                                               |                                                                                                                                                                                                                                                                                                                              |                                                                                                                                                                                                                                                      |
|------------------|-------------------------------------------------------------------------------------------------------------------------------|------------------------------------------------------------------------------------------------------------------------------------------------------------------------------------------------------------------------------------------------------------------------------------------------------------------------------|------------------------------------------------------------------------------------------------------------------------------------------------------------------------------------------------------------------------------------------------------|
| 9 <sup>th</sup>  | 342.84 nm (3.62 eV)<br>$f = 0.0040$<br>HOMO-1→LUMO+2: -0.19<br>HOMO→LUMO+2: 0.61<br>HOMO→LUMO+3: 0.26                         | 348.68 nm (3.56 eV)<br>$f = 0.0006$<br>HOMO-2→LUMO+1: 0.10<br>HOMO-2→LUMO+4: -0.14<br>HOMO→LUMO+1: -0.14<br>HOMO→LUMO+3: -0.19<br>HOMO→LUMO+4: 0.63                                                                                                                                                                          | 349.95 nm (3.54 eV)<br>$f = 0.0057$<br>HOMO-11→LUMO: 0.12<br>HOMO-6→LUMO: -0.13<br>HOMO-6→LUMO+1: 0.20<br>HOMO-5→LUMO+1: 0.13                                                                                                                        |
| 10 <sup>th</sup> | 342.81 nm (3.62 eV)<br>$f = 0.0076$<br>HOMO-1→LUMO+2: -0.23<br>HOMO-1→LUMO+3: 0.62<br>HOMO→LUMO+2: -0.17<br>HOMO→LUMO+3: 0.11 | 346.99 nm (3.57 eV)<br>$f = 0.0000$<br>HOMO-10→LUMO: 0.66<br>HOMO-3→LUMO: 0.15                                                                                                                                                                                                                                               | 349.94 nm (3.54 eV)<br>$f = 0.0130$<br>HOMO-10→LUMO+1: 0.12<br>HOMO-6→LUMO: -0.13<br>HOMO-5→LUMO: -0.20<br>HOMO-5→LUMO+1: 0.65                                                                                                                       |
| 11 <sup>th</sup> | 342.59 nm (3.62 eV)<br>$f = 0.0039$<br>HOMO-3→LUMO+1: -0.41<br>HOMO-2→LUMO+1: 0.56                                            | 344.33 nm (3.60 eV)<br>$f = 0.0000$<br>HOMO-2→LUMO+1: -0.23<br>HOMO→LUMO+1: 0.64<br>HOMO→LUMO+4: 0.16                                                                                                                                                                                                                        | 344.15 nm (3.60 eV)<br>$f = 0.0011$<br>HOMO-7→LUMO: -0.39<br>HOMO-7→LUMO+1: -0.12<br>HOMO-2→LUMO: 0.40<br>HOMO-2→LUMO+1: 0.13<br>HOMO-1→LUMO: -0.36<br>HOMO-1→LUMO+1: -0.10                                                                          |
| 12 <sup>th</sup> | 342.57 nm (3.62 eV)<br>$f = 0.0034$<br>HOMO-3→LUMO: 0.56<br>HOMO-2→LUMO: 0.41                                                 | 344.33 nm (3.60 eV)<br>$f = 0.0000$<br>HOMO-2→LUMO+2: -0.23<br>HOMO→LUMO+2: 0.64<br>HOMO→LUMO+3: 0.16                                                                                                                                                                                                                        | 344.14 nm (3.60 eV)<br>$f = 0.0009$<br>HOMO-7→LUMO: 0.11<br>HOMO-7→LUMO+1: 0.39<br>HOMO-2→LUMO: -0.13<br>HOMO-2→LUMO+1: 0.40<br>HOMO-1→LUMO: -0.11<br>HOMO-1→LUMO+1: 0.36                                                                            |
| 13 <sup>th</sup> | 341.89 nm (3.63 eV)<br>$f = 0.0003$<br>HOMO-5→LUMO: 0.47<br>HOMO-4→LUMO: 0.51                                                 | 342.62 nm (3.62 eV)<br>$f = 0.2407$<br>HOMO-11→LUMO: -0.50<br>HOMO-9→LUMO+1: -0.14<br>HOMO-8→LUMO+2: 0.14<br>HOMO-7→LUMO+1: 0.11<br>HOMO-6→LUMO+2: -0.12<br>HOMO-5→LUMO: 0.10<br>HOMO-4→LUMO: 0.13<br>HOMO→LUMO+5: 0.29<br>HOMO→LUMO+12: -0.13                                                                               | 342.32 nm (3.62 eV)<br>$f = 0.0001$<br>HOMO-13→LUMO: 0.27<br>HOMO-12→LUMO+1: 0.27<br>HOMO-6→LUMO+6: -0.13<br>HOMO-5→LUMO+5: -0.12<br>HOMO-4→LUMO+4: -0.24<br>HOMO-3→LUMO+3: 0.26<br>HOMO-2→LUMO+4: 0.14<br>HOMO-1→LUMO+3: -0.14<br>HOMO→LUMO+4: 0.35 |
| 14 <sup>th</sup> | 341.87 nm (3.63 eV)<br>$f = 0.0003$<br>HOMO-5→LUMO+1: 0.51<br>HOMO-4→LUMO+1: -0.47                                            | 342.13 nm (3.62 eV)<br>$f = 1.1076$<br>HOMO-13→LUMO+2: 0.13<br>HOMO-12→LUMO+1: -0.13<br>HOMO-9→LUMO+1: 0.29<br>HOMO-9→LUMO+4: -0.13<br>HOMO-8→LUMO+2: -0.28<br>HOMO-8→LUMO+3: 0.13<br>HOMO-7→LUMO+3: 0.10<br>HOMO-7→LUMO+4: -0.24<br>HOMO-6→LUMO+3: 0.24<br>HOMO-5→LUMO: 0.10<br>HOMO-2→LUMO+6: 0.16<br>HOMO-1→LUMO+7: -0.17 | 342.22 nm (3.62 eV)<br>$f = 0.0323$<br>HOMO-3→LUMO+4: 0.11<br>HOMO-2→LUMO+3: 0.14<br>HOMO-1→LUMO+4: -0.19<br>HOMO→LUMO+3: 0.63                                                                                                                       |

|                  |                                          |                                          |                                          |
|------------------|------------------------------------------|------------------------------------------|------------------------------------------|
| 15 <sup>th</sup> | 341.46 nm (3.63 eV)<br><i>f</i> = 0.8768 | 341.62 nm (3.63 eV)<br><i>f</i> = 0.0001 | 342.05 nm (3.63 eV)<br><i>f</i> = 0.0034 |
|                  | HOMO-3→LUMO+2: 0.16                      | HOMO-2→LUMO+2: -0.11                     | HOMO-13→LUMO: -0.21                      |
|                  | HOMO-3→LUMO+3: 0.32                      | HOMO-2→LUMO+3: 0.40                      | HOMO-12→LUMO+1: -0.19                    |
|                  | HOMO-3→LUMO+5: 0.33                      | HOMO-2→LUMO+4: 0.15                      | HOMO-6→LUMO+6: 0.14                      |
|                  | HOMO-2→LUMO+2: 0.18                      | HOMO-1→LUMO+2: -0.13                     | HOMO-5→LUMO+5: 0.11                      |
|                  | HOMO-2LUMO+3: -0.17                      | HOMO-1→LUMO+3: 0.49                      | HOMO-4→LUMO+4: 0.15                      |
|                  | HOMO-2→LUMO+4: 0.32                      | HOMO-1→LUMO+4: 0.18                      | HOMO-3→LUMO+3: -0.14                     |
|                  | HOMO-1→LUMO+7: 0.10                      |                                          | HOMO-1→LUMO+3: -0.13                     |
|                  | HOMO→LUMO+6: 0.10                        |                                          | HOMO→LUMO+4: 0.55                        |

**Table S7.** Results of TD-DFT calculations of the large supercell extended by 0.5 unit cells for two axes of **1ar** with geometries of crystal structure obtained from X-ray crystallographic analysis.

| Excited states  | Extension by 0.5 units for two axes                                                                                                                                                                         |                                                                                       |                                                                                                                                         |
|-----------------|-------------------------------------------------------------------------------------------------------------------------------------------------------------------------------------------------------------|---------------------------------------------------------------------------------------|-----------------------------------------------------------------------------------------------------------------------------------------|
|                 | <i>a</i> and <i>b</i>                                                                                                                                                                                       | <i>b</i> and <i>c</i>                                                                 | <i>a</i> and <i>c</i>                                                                                                                   |
| 1 <sup>st</sup> | 386.33 nm (3.21 eV)<br><i>f</i> = 0.0010<br>HOMO→LUMO+3: 0.57<br>HOMO→LUMO+4: 0.19<br>HOMO→LUMO+5: -0.34                                                                                                    | 382.91 nm (3.24 eV)<br><i>f</i> = 0.0011<br>HOMO-1→LUMO+2: 0.68                       | 378.97 nm (3.27 eV)<br><i>f</i> = 0.0046<br>HOMO→LUMO+3: 0.69                                                                           |
| 2 <sup>nd</sup> | 371.28 nm (3.34 eV)<br><i>f</i> = 0.0051<br>HOMO-1→LUMO+3: 0.54<br>HOMO-1→LUMO+4: 0.18<br>HOMO-1→LUMO+5: -0.30<br>HOMO-1→LUMO+7: 0.21<br>HOMO-1→LUMO+8: 0.13                                                | 375.84 nm (3.30 eV)<br><i>f</i> = 0.0044<br>HOMO→LUMO+5: 0.67<br>HOMO→LUMO+6: -0.12   | 370.98 nm (3.34 eV)<br><i>f</i> = 0.0002<br>HOMO→LUMO: 0.70                                                                             |
| 3 <sup>rd</sup> | 365.61 nm (3.39 eV)<br><i>f</i> = 0.0000<br>HOMO→LUMO: 0.70                                                                                                                                                 | 373.14 nm (3.32 eV)<br><i>f</i> = 0.0003<br>HOMO→LUMO: 0.69                           | 369.53 nm (3.36 eV)<br><i>f</i> = 0.0006<br>HOMO→LUMO+1: 0.70                                                                           |
| 4 <sup>th</sup> | 365.33 nm (3.39 eV)<br><i>f</i> = 0.0000<br>HOMO→LUMO+1: 0.66<br>HOMO→LUMO+2: -0.24                                                                                                                         | 371.44 nm (3.34 eV)<br><i>f</i> = 0.0003<br>HOMO→LUMO+1: 0.70                         | 366.93 nm (3.38 eV)<br><i>f</i> = 0.0018<br>HOMO→LUMO+2: 0.70                                                                           |
| 5 <sup>th</sup> | 364.07 nm (3.41 eV)<br><i>f</i> = 0.0003<br>HOMO→LUMO+1: 0.24<br>HOMO→LUMO+2: 0.65                                                                                                                          | 365.36 nm (3.39 eV)<br><i>f</i> = 0.0008<br>HOMO-2→LUMO: 0.66<br>HOMO-1→LUMO: -0.23   | 364.82 nm (3.40 eV)<br><i>f</i> = 0.0032<br>HOMO-4→LUMO: -0.17<br>HOMO-3→LUMO: -0.18<br>HOMO-1→LUMO: 0.64<br>HOMO-1→LUMO+3: 0.13        |
| 6 <sup>th</sup> | 363.16 nm (3.41 eV)<br><i>f</i> = 0.0213<br>HOMO-3→LUMO+3: -0.11<br>HOMO-2→LUMO+3: 0.53<br>HOMO-2→LUMO+4: 0.18<br>HOMO-2→LUMO+5: -0.30<br>HOMO-2→LUMO+7: 0.17<br>HOMO-1→LUMO+8: -0.10<br>HOMO→LUMO+7: -0.10 | 364.40 nm (3.40 eV)<br><i>f</i> = 0.0001<br>HOMO-2→LUMO+2: -0.19<br>HOMO→LUMO+2: 0.65 | 364.27 nm (3.40 eV)<br><i>f</i> = 0.0015<br>HOMO-4→LUMO+1: -0.12<br>HOMO-3→LUMO+1: -0.13<br>HOMO-1→LUMO+1: 0.66<br>HOMO-1→LUMO+3: -0.12 |

|                  |                                                                                                                                                                                                                                                                |                                                                                                                                                                                                         |                                                                                                                                                  |
|------------------|----------------------------------------------------------------------------------------------------------------------------------------------------------------------------------------------------------------------------------------------------------------|---------------------------------------------------------------------------------------------------------------------------------------------------------------------------------------------------------|--------------------------------------------------------------------------------------------------------------------------------------------------|
| 7 <sup>th</sup>  | 361.84 nm (3.43 eV)<br>$f = 0.0086$<br>HOMO-2→LUMO+5: 0.13<br>HOMO-1→LUMO+3: 0.22<br>HOMO-1→LUMO+4: 0.14<br>HOMO-1→LUMO+5: 0.48<br>HOMO→LUMO+3: -0.16<br>HOMO→LUMO+4: -0.10<br>HOMO→LUMO+5: -0.34                                                              | 360.90 nm (3.44 eV)<br>$f = 0.0001$<br>HOMO-2→LUMO: 0.23<br>HOMO-1→LUMO: 0.67                                                                                                                           | 363.87 nm (3.41 eV)<br>$f = 0.0406$<br>HOMO-1→LUMO: -0.13<br>HOMO-1→LUMO+1: 0.16<br>HOMO-1→LUMO+3: 0.51<br>HOMO→LUMO+7: -0.39                    |
| 8 <sup>th</sup>  | 360.33 nm (3.44 eV)<br>$f = 0.0003$<br>HOMO-1→LUMO+1: 0.69<br>HOMO-1→LUMO+2: -0.10                                                                                                                                                                             | 359.41 nm (3.45 eV)<br>$f = 0.0082$<br>HOMO-5→LUMO+2: 0.16<br>HOMO-4→LUMO+1: -0.11<br>HOMO-3→LUMO+1: 0.56<br>HOMO-2→LUMO+1: 0.18<br>HOMO-1→LUMO+1: 0.19<br>HOMO-1→LUMO+6: 0.21                          | 361.23 nm (3.43 eV)<br>$f = 0.0214$<br>HOMO-3→LUMO+7: -0.10<br>HOMO-1→LUMO+3: 0.41<br>HOMO→LUMO+7: 0.54                                          |
| 9 <sup>th</sup>  | 359.94 nm (3.44 eV)<br>$f = 0.0038$<br>HOMO-5→LUMO+3: 0.11<br>HOMO-3→LUMO+3: 0.12<br>HOMO-1→LUMO+5: -0.11<br>HOMO-1→LUMO+7: 0.14<br>HOMO→LUMO+5: -0.10<br>HOMO→LUMO+7: 0.59                                                                                    | 359.34 nm (3.45 eV)<br>$f = 0.0210$<br>HOMO-9: LUMO+2: 0.17<br>HOMO-5→LUMO+2: 0.32<br>HOMO-4→LUMO+2: 0.15<br>HOMO-3→LUMO+1: -0.28<br>HOMO-3→LUMO+2: -0.14<br>HOMO-1→LUMO+5: 0.12<br>HOMO-1→LUMO+6: 0.43 | 359.24 nm (3.45 eV)<br>$f = 0.0025$<br>HOMO-5→LUMO: 0.70                                                                                         |
| 10 <sup>th</sup> | 358.81 nm (3.46 eV)<br>$f = 0.0003$<br>HOMO-1→LUMO: 0.64<br>HOMO-1→LUMO+5: 0.11<br>HOMO→LUMO+3: 0.10<br>HOMO→LUMO+5: 0.20                                                                                                                                      | 357.38 nm (3.47 eV)<br>$f = 0.0375$<br>HOMO-3→LUMO+2: -0.10<br>HOMO-2→LUMO+2: 0.42<br>HOMO-2→LUMO+5: 0.46<br>HOMO-1→LUMO+5: -0.14<br>HOMO→LUMO+2: 0.15                                                  | 357.22 nm (3.47 eV)<br>$f = 0.1716$<br>HOMO-6→LUMO+3: -0.12<br>HOMO-3→LUMO: 0.29<br>HOMO-3→LUMO+3: 0.55<br>HOMO→LUMO+8: 0.18                     |
| 11 <sup>th</sup> | 358.67 nm (3.46 eV)<br>$f = 0.0017$<br>HOMO-3→LUMO+3: 0.14<br>HOMO-1→LUMO: -0.28<br>HOMO-1→LUMO+2: 0.15<br>HOMO-1→LUMO+3: 0.15<br>HOMO-1→LUMO+5: 0.28<br>HOMO→LUMO+3: 0.20<br>HOMO→LUMO+4: 0.12<br>HOMO→LUMO+5: 0.41<br>HOMO→LUMO+7: 0.11<br>HOMO→LUMO+8: 0.12 | 356.16 nm (3.48 eV)<br>$f = 0.0085$<br>HOMO-3→LUMO+1: -0.15<br>HOMO-2→LUMO+1: -0.23<br>HOMO-2→LUMO+2: -0.10<br>HOMO-1→LUMO+1: 0.61<br>HOMO-1→LUMO+4: -0.13                                              | 356.88 nm (3.47 eV)<br>$f = 0.0025$<br>HOMO-6→LUMO+2: 0.10<br>HOMO-4→LUMO+2: 0.19<br>HOMO-1→LUMO+2: 0.66                                         |
| 12 <sup>th</sup> | 358.57 nm (3.46 eV)<br>$f = 0.0002$<br>HOMO-2→LUMO+2: -0.27<br>HOMO-1→LUMO+1: 0.13<br>HOMO-1→LUMO+2: 0.61                                                                                                                                                      | 356.08 nm (3.48 eV)<br>$f = 0.0072$<br>HOMO-4→LUMO: 0.51<br>HOMO-3→LUMO: 0.45<br>HOMO-1→LUMO+1: -0.10                                                                                                   | 356.56 nm (3.48 eV)<br>$f = 0.0317$<br>HOMO-6→LUMO: -0.12<br>HOMO-4→LUMO: 0.12<br>HOMO-3→LUMO: 0.57<br>HOMO-3→LUMO+3: -0.28<br>HOMO-1→LUMO: 0.17 |
| 13 <sup>th</sup> | 357.83 nm (3.46 eV)<br>$f = 0.0286$<br>HOMO-3→LUMO+3: 0.21<br>HOMO-3→LUMO+5: -0.15<br>HOMO→LUMO+5: -0.13<br>HOMO→LUMO+7: -0.15<br>HOMO→LUMO+8: 0.57                                                                                                            | 355.63 nm (3.49 eV)<br>$f = 0.2005$<br>HOMO-9→LUMO+2: 0.11<br>HOMO-3→LUMO+2: 0.11<br>HOMO-2→LUMO+2: -0.40<br>HOMO-2→LUMO+5: 0.44<br>HOMO-1→LUMO+1: -0.11<br>HOMO-1→LUMO+6: 0.16<br>HOMO→LUMO+7: -0.11   | 353.17 nm (3.51 eV)<br>$f = 0.0001$<br>HOMO-4→LUMO+1: 0.30<br>HOMO-3→LUMO+1: 0.59<br>HOMO-2→LUMO+1: 0.14<br>HOMO-1→LUMO+1: 0.17                  |

|                    |                      |                      |                      |
|--------------------|----------------------|----------------------|----------------------|
| 14 <sup>th</sup>   | 357.28 nm (3.47 eV)  | 354.46 nm (3.50 eV)  | 352.76 nm (3.51 eV)  |
|                    | $f = 0.0004$         | $f = 0.3393$         | $f = 0.0000$         |
|                    | HOMO→LUMO+3: -0.25   | HOMO-9→LUMO+2: 0.11  | HOMO-3→LUMO: -0.11   |
|                    | HOMO→LUMO+4: 0.64    | HOMO-5→LUMO+2: -0.19 | HOMO-2→LUMO: 0.70    |
|                    | HOMO-4→LUMO+2: -0.20 |                      |                      |
|                    | HOMO-4→LUMO+5: -0.20 |                      |                      |
|                    | HOMO-3→LUMO+2: 0.24  |                      |                      |
|                    | HOMO-3→LUMO+5: 0.33  |                      |                      |
|                    | HOMO-2→LUMO+2: 0.26  |                      |                      |
|                    | HOMO-1→LUMO+5: 0.17  |                      |                      |
|                    | HOMO-1→LUMO+6: 0.23  |                      |                      |
| 15 <sup>th</sup>   | 356.23 nm (3.48 eV)  | 353.96 nm (3.50 eV)  | 352.48 nm (3.52 eV)  |
|                    | $f = 0.0506$         | $f = 0.3393$         | $f = 0.0008$         |
|                    | HOMO-3→LUMO+3: 0.43  | HOMO-1→LUMO+3: 0.68  | HOMO-6→LUMO+2: 0.11  |
|                    | HOMO-3→LUMO+4: 0.14  | HOMO→LUMO+3: 0.11    | HOMO-4→LUMO+2: -0.40 |
|                    | HOMO-3→LUMO+5: -0.26 |                      | HOMO-3→LUMO+2: 0.55  |
|                    | HOMO-1→LUMO+7: 0.12  |                      |                      |
|                    | HOMO-2→LUMO+7: 0.10  |                      |                      |
|                    | HOMO-1→LUMO+7: -0.24 |                      |                      |
| HOMO→LUMO+8: -0.29 |                      |                      |                      |

---

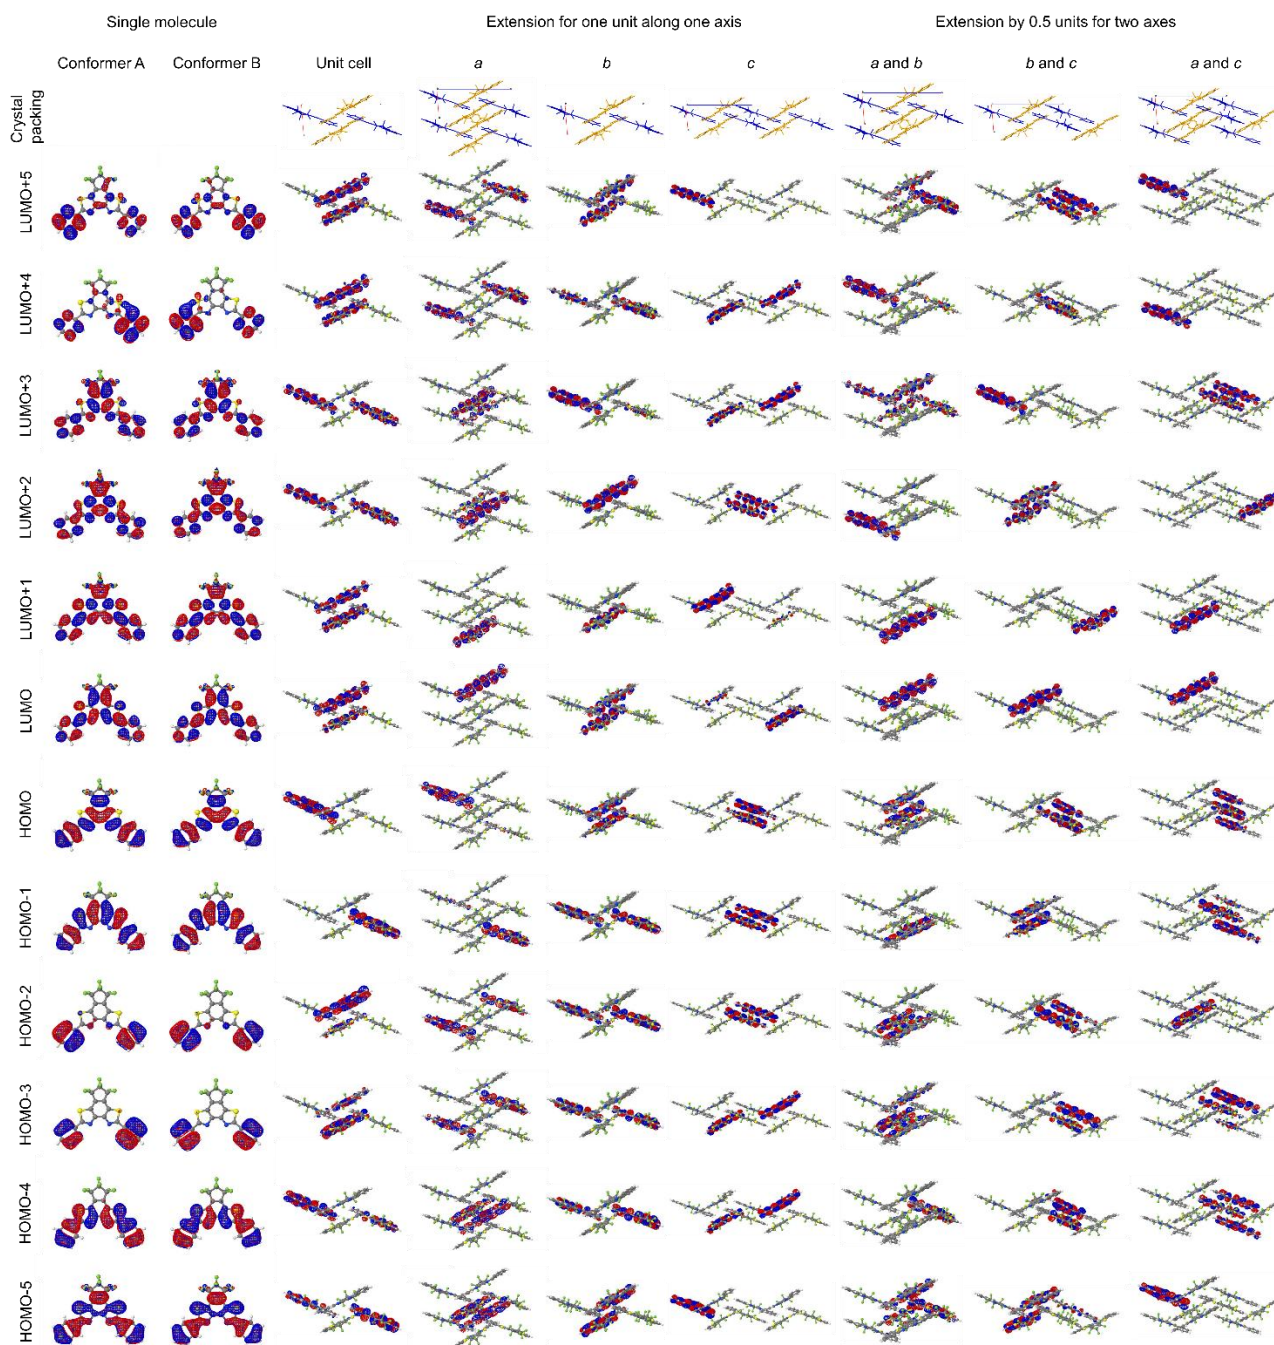

**Fig. S16** Kohn-Sham molecular orbitals estimated for a single molecule, unit cell, and large supercell of **1ar** with geometries of crystal structure obtained from X-ray crystallographic analysis using the TD-DFT method based on the B3LYP/6-31G(d,p) level of theory.

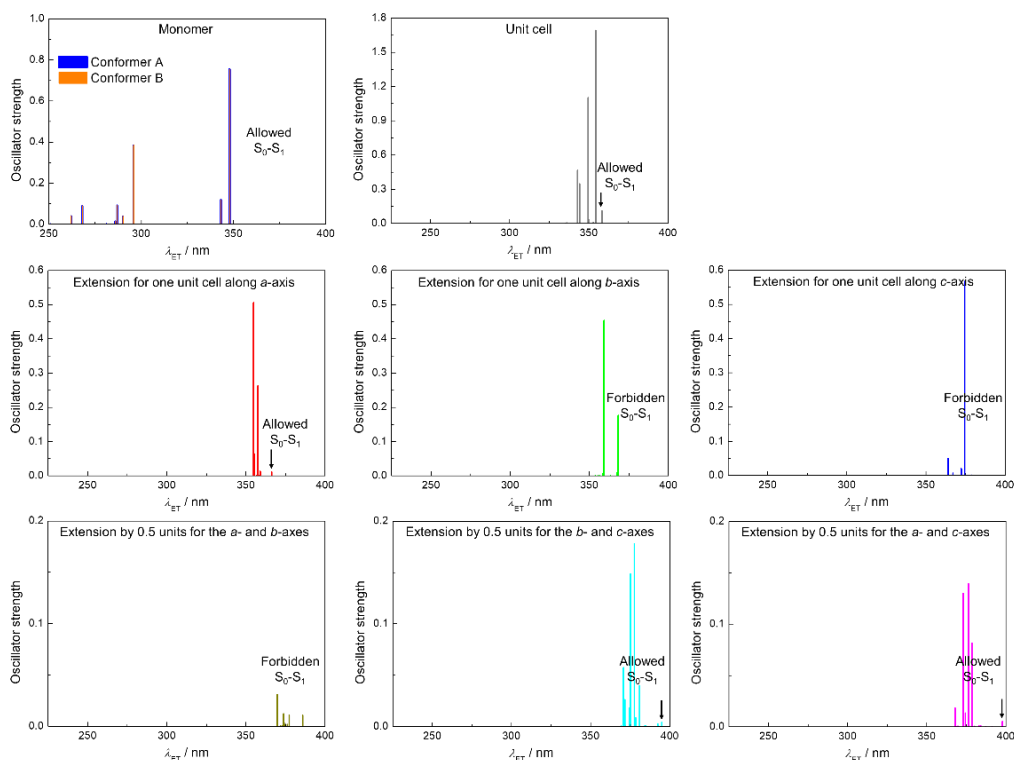

**Fig. S17** Electronic transitions estimated for a single molecule, unit cell, and large supercell of **1ar** replaced by optimized structures based on the B3LYP/6-31G(d,p) level of theory using the TD-DFT method based on the B3LYP/6-31G(d,p) level of theory.

**Table S8.** Results of TD-DFT calculations with geometries of single molecule and unit cell of **1ar** replaced by optimized structures based on the B3LYP/6-31G(d,p) level of theory.

| Single molecule |                                                                                                    |                                                                                                      |                                                                                                                                                     |
|-----------------|----------------------------------------------------------------------------------------------------|------------------------------------------------------------------------------------------------------|-----------------------------------------------------------------------------------------------------------------------------------------------------|
| Excited states  | Conformer A                                                                                        | Conformer B                                                                                          | Unit cell                                                                                                                                           |
| 1 <sup>st</sup> | 347.87 nm (3.56 eV)<br>$f = 0.7550$<br>HOMO→LUMO: 0.70                                             | 347.87 nm (3.56 eV)<br>$f = 0.7549$<br>HOMO→LUMO: 0.70                                               | 358.19 nm (3.46 eV)<br>$f = 0.0010$<br>HOMO-1→LUMO: 0.49<br>HOMO→LUMO: 0.12<br>HOMO→LUMO+1: 0.46                                                    |
| 2 <sup>nd</sup> | 343.07 nm (3.61 eV)<br>$f = 0.1187$<br>HOMO-1→LUMO: 0.66<br>HOMO→LUMO+1: -0.22                     | 343.06 nm (3.61 eV)<br>$f = 0.1186$<br>HOMO-1→LUMO: 0.66<br>HOMO→LUMO+1: 0.22                        | 358.15 nm (3.46 eV)<br>$f = 0.1097$<br>HOMO-1→LUMO+1: 0.46<br>HOMO→LUMO: 0.46<br>HOMO→LUMO+1: -0.18                                                 |
| 3 <sup>rd</sup> | 295.84 nm (4.19 eV)<br>$f = 0.3841$<br>HOMO-2→LUMO: 0.13<br>HOMO-1→LUMO: 0.21<br>HOMO→LUMO+1: 0.65 | 295.84 nm (4.19 eV)<br>$f = 0.3842$<br>HOMO-2→LUMO: -0.13<br>HOMO-1→LUMO: -0.21<br>HOMO→LUMO+1: 0.65 | 354.34 nm (3.50 eV)<br>$f = 1.6922$<br>HOMO-1→LUMO+1: 0.14<br>HOMO-1→LUMO+2: 0.25<br>HOMO-1→LUMO+3: 0.40<br>HOMO→LUMO+2: 0.40<br>HOMO→LUMO+3: -0.25 |

|                  |                                                                                                                               |                                                                                                                              |                                                                                                                                                                                                                                                                                                                          |
|------------------|-------------------------------------------------------------------------------------------------------------------------------|------------------------------------------------------------------------------------------------------------------------------|--------------------------------------------------------------------------------------------------------------------------------------------------------------------------------------------------------------------------------------------------------------------------------------------------------------------------|
| 4 <sup>th</sup>  | 290.01 nm (4.28 eV)<br>$f = 0.0387$<br>HOMO-3→LUMO: -0.10<br>HOMO-1→LUMO+1: 0.68                                              | 290.00 nm (4.28 eV)<br>$f = 0.0388$<br>HOMO-3→LUMO: 0.10<br>HOMO-1→LUMO+1: 0.68                                              | 353.66 nm (3.51 eV)<br>$f = 0.0000$<br>HOMO-7→LUMO+1: 0.11<br>HOMO-6→LUMO: -0.10<br>HOMO-3→LUMO: 0.24<br>HOMO-2→LUMO+1: 0.24<br>HOMO-1→LUMO+2: 0.35<br>HOMO-1→LUMO+3: -0.17<br>HOMO→LUMO+1: 0.17<br>HOMO→LUMO+2: 0.17<br>HOMO→LUMO+3: 0.35                                                                               |
| 5 <sup>th</sup>  | 286.91 nm (4.32 eV)<br>$f = 0.0910$<br>HOMO-3→LUMO+1: -0.13<br>HOMO-2→LUMO: 0.65<br>HOMO→LUMO+1: -0.11<br>HOMO→LUMO+5: 0.10   | 286.91 nm (4.32 eV)<br>$f = 0.0910$<br>HOMO-3→LUMO+1: 0.13<br>HOMO-2→LUMO: 0.65<br>HOMO→LUMO+1: 0.11<br>HOMO→LUMO+5: -0.10   | 352.83 nm (3.51 eV)<br>$f = 0.0083$<br>HOMO-1→LUMO: -0.34<br>HOMO-1→LUMO+1: -0.32<br>HOMO→LUMO: 0.48<br>HOMO→LUMO+1: 0.19                                                                                                                                                                                                |
| 6 <sup>th</sup>  | 285.92 nm (4.34 eV)<br>$f = 0.0142$<br>HOMO-3→LUMO: 0.66<br>HOMO-2→LUMO+1: -0.13<br>HOMO-1→LUMO+1: 0.11<br>HOMO→LUMO+4: -0.11 | 285.92 nm (4.34 eV)<br>$f = 0.0141$<br>HOMO-3→LUMO: 0.66<br>HOMO-2→LUMO+1: 0.13<br>HOMO-1→LUMO+1: -0.11<br>HOMO→LUMO+4: 0.11 | 352.82 nm (3.51 eV)<br>$f = 0.0037$<br>HOMO-1→LUMO: -0.36<br>HOMO-1→LUMO+1: 0.38<br>HOMO→LUMO: -0.16<br>HOMO→LUMO+1: 0.43                                                                                                                                                                                                |
| 7 <sup>th</sup>  | 281.04 nm (4.41 eV)<br>$f = 0.0003$<br>HOMO-7→LUMO+1: -0.16<br>HOMO-6→LUMO: 0.69                                              | 281.04 nm (4.41 eV)<br>$f = 0.0003$<br>HOMO-7→LUMO+1: -0.16<br>HOMO-6→LUMO: 0.69                                             | 349.56 nm (3.55 eV)<br>$f = 1.1013$<br>HOMO-3→LUMO: 0.25<br>HOMO-3→LUMO+1: 0.40<br>HOMO-2→LUMO: 0.40<br>HOMO-2→LUMO+1: -0.25                                                                                                                                                                                             |
| 8 <sup>th</sup>  | 268.27 nm (4.62 eV)<br>$f = 0.0000$<br>HOMO-7→LUMO: 0.64<br>HOMO-6→LUMO+1: -0.29                                              | 268.27 nm (4.62 eV)<br>$f = 0.0000$<br>HOMO-7→LUMO: 0.64<br>HOMO-6→LUMO+1: -0.29                                             | 349.32 nm (3.55 eV)<br>$f = 0.0000$<br>HOMO-3→LUMO: 0.42<br>HOMO-2→LUMO+1: 0.42<br>HOMO-1→LUMO+2: -0.21<br>HOMO-1→LUMO+3: 0.10<br>HOMO→LUMO+2: -0.10<br>HOMO→LUMO+3: -0.21                                                                                                                                               |
| 9 <sup>th</sup>  | 268.08 nm (4.62 eV)<br>$f = 0.0890$<br>HOMO-4→LUMO: 0.63<br>HOMO-1→LUMO: 0.11<br>HOMO→LUMO+2: 0.25<br>HOMO→LUMO+5: 0.10       | 268.08 nm (4.62 eV)<br>$f = 0.0889$<br>HOMO-4→LUMO: 0.63<br>HOMO-1→LUMO: -0.11<br>HOMO→LUMO+2: 0.25<br>HOMO→LUMO+5: 0.10     | 344.12 nm (3.60 eV)<br>$f = 0.3467$<br>HOMO-7→LUMO: -0.45<br>HOMO-6→LUMO+1: 0.45<br>HOMO-3→LUMO+5: -0.14<br>HOMO-2→LUMO+4: -0.14                                                                                                                                                                                         |
| 10 <sup>th</sup> | 262.01 nm (4.73 eV)<br>$f = 0.0395$<br>HOMO-5→LUMO: 0.66<br>HOMO-1→LUMO+2: -0.17                                              | 262.00 nm (4.73 eV)<br>$f = 0.0395$<br>HOMO-5→LUMO: 0.66<br>HOMO-1→LUMO+2: 0.17                                              | 343.91 nm (3.61 eV)<br>$f = 0.0000$<br>HOMO-7→LUMO: -0.12<br>HOMO-7→LUMO+1: -0.34<br>HOMO-6→LUMO: 0.34<br>HOMO-6→LUMO+1: -0.12<br>HOMO-5→LUMO+2: 0.26<br>HOMO-5→LUMO+3: -0.11<br>HOMO-4→LUMO+2: 0.11<br>HOMO-4→LUMO+3: 0.26<br>HOMO-3→LUMO+4: -0.12<br>HOMO-2→LUMO+5: -0.12<br>HOMO-1→LUMO+7: -0.10<br>HOMO→LUMO+6: 0.10 |



|                  |                                                                                                                                                                                               |                                                                                                                                                                                                 |                                                                                                                                                                                                                                                                          |
|------------------|-----------------------------------------------------------------------------------------------------------------------------------------------------------------------------------------------|-------------------------------------------------------------------------------------------------------------------------------------------------------------------------------------------------|--------------------------------------------------------------------------------------------------------------------------------------------------------------------------------------------------------------------------------------------------------------------------|
| 11 <sup>th</sup> | 250.72 nm (4.95 eV)<br>$f = 0.0005$<br>HOMO-3→LUMO: 0.20<br>HOMO-2→LUMO+1: 0.60<br>HOMO-1→LUMO+2: -0.19<br>HOMO→LUMO+3: -0.14<br>HOMO→LUMO+4: 0.15                                            | 250.72 nm (4.95 eV)<br>$f = 0.0005$<br>HOMO-3→LUMO: -0.20<br>HOMO-2→LUMO+1: 0.60<br>HOMO-1→LUMO+2: -0.19<br>HOMO→LUMO+3: 0.14<br>HOMO→LUMO+4: 0.15                                              | 342.81 nm (3.62 eV)<br>$f = 0.4639$<br>HOMO-5→LUMO+2: 0.26<br>HOMO-5→LUMO+3: 0.37<br>HOMO-4→LUMO+2: 0.37<br>HOMO-4→LUMO+3: -0.26<br>HOMO-1→LUMO+6: 0.15<br>HOMO→LUMO+7: -0.15                                                                                            |
| 12 <sup>th</sup> | 249.79 nm (4.96 eV)<br>$f = 0.0015$<br>HOMO-3→LUMO+1: 0.59<br>HOMO-2→LUMO: 0.20<br>HOMO-1→LUMO+4: -0.13<br>HOMO→LUMO+2: 0.21<br>HOMO→LUMO+5: -0.18                                            | 249.79 nm (4.96 eV)<br>$f = 0.0015$<br>HOMO-3→LUMO+1: 0.59<br>HOMO-2→LUMO: -0.20<br>HOMO-1→LUMO+4: -0.13<br>HOMO→LUMO+2: 0.21<br>HOMO→LUMO+5: -0.18                                             | 342.16 nm (3.62 eV)<br>$f = 0.0000$<br>HOMO-7→LUMO+1: 0.23<br>HOMO-6→LUMO: -0.23<br>HOMO-5→LUMO+2: 0.33<br>HOMO-5→LUMO+3: -0.13<br>HOMO-4→LUMO+2: 0.14<br>HOMO-4→LUMO+3: 0.33<br>HOMO-1→LUMO+2: -0.14<br>HOMO-1→LUMO+7: -0.11<br>HOMO→LUMO+3: -0.14<br>HOMO→LUMO+6: 0.11 |
| 13 <sup>th</sup> | 243.15 nm (5.10 eV)<br>$f = 0.0078$<br>HOMO-4→LUMO: -0.24<br>HOMO-3→LUMO+1: -0.19<br>HOMO-1→LUMO+3: -0.27<br>HOMO→LUMO+2: 0.54                                                                | 243.15 nm (5.10 eV)<br>$f = 0.0078$<br>HOMO-4→LUMO: -0.24<br>HOMO-3→LUMO+1: -0.19<br>HOMO-1→LUMO+3: 0.27<br>HOMO→LUMO+2: 0.54                                                                   | 335.99 nm (3.69 eV)<br>$f = 0.0055$<br>HOMO-5→LUMO: 0.26<br>HOMO-5→LUMO+1: 0.45<br>HOMO-4→LUMO: 0.45                                                                                                                                                                     |
| 14 <sup>th</sup> | 242.29 nm (5.12 eV)<br>$f = 0.1116$<br>HOMO-9→LUMO: -0.11<br>HOMO-5→LUMO: 0.12<br>HOMO-4→LUMO+1: 0.26<br>HOMO-2→LUMO+1: 0.16<br>HOMO-1→LUMO+2: 0.49<br>HOMO→LUMO+3: 0.30<br>HOMO→LUMO+4: 0.18 | 242.29 nm (5.12 eV)<br>$f = 0.1115$<br>HOMO-9→LUMO: 0.11<br>HOMO-5→LUMO: -0.12<br>HOMO-4→LUMO+1: -0.26<br>HOMO-2→LUMO+1: 0.16<br>HOMO-1→LUMO+2: 0.49<br>HOMO→LUMO+3: -0.30<br>HOMO→LUMO+4: 0.18 | 335.98 nm (3.69 eV)<br>$f = 0.0003$<br>HOMO-5→LUMO: 0.43<br>HOMO-5→LUMO+1: -0.15<br>HOMO-4→LUMO+1: 0.51                                                                                                                                                                  |
| 15 <sup>th</sup> | 236.75 nm (5.24 eV)<br>$f = 0.0004$<br>HOMO-7→LUMO: 0.29<br>HOMO-6→LUMO+1: 0.64                                                                                                               | 236.75 nm (5.24 eV)<br>$f = 0.0004$<br>HOMO-7→LUMO: 0.29<br>HOMO-6→LUMO+1: 0.64                                                                                                                 | 335.35 nm (3.70 eV)<br>$f = 0.0001$<br>HOMO-5→LUMO: -0.37<br>HOMO-5→LUMO+1: -0.22<br>HOMO-4→LUMO: 0.46<br>HOMO-4→LUMO+1: 0.29                                                                                                                                            |

**Table S9.** Results of TD-DFT calculations with geometries of the large supercell extended by one unit cell along one axis of **1ar** replaced by optimized structures based on the B3LYP/6-31G(d,p) level of theory.

| Extension for one unit cell along one axis |                                                                                                  |                                                                                 |                                                                               |
|--------------------------------------------|--------------------------------------------------------------------------------------------------|---------------------------------------------------------------------------------|-------------------------------------------------------------------------------|
| Excited states                             | <i>a</i>                                                                                         | <i>b</i>                                                                        | <i>c</i>                                                                      |
| 1 <sup>st</sup>                            | 366.12 nm (3.39 eV)<br>$f = 0.0025$<br>HOMO-1→LUMO: 0.65<br>HOMO→LUMO: 0.12<br>HOMO→LUMO+1: 0.23 | 388.41 nm (3.19 eV)<br>$f = 0.0000$<br>HOMO-2→LUMO+2: 0.57<br>HOMO→LUMO+2: 0.39 | 393.15 nm (3.15 eV)<br>$f = 0.0000$<br>HOMO→LUMO+2: 0.48<br>HOMO→LUMO+4: 0.51 |

|                 |                                                                                                                                                                                                                               |                                                                                                                                                         |                                                                                                                                                                              |
|-----------------|-------------------------------------------------------------------------------------------------------------------------------------------------------------------------------------------------------------------------------|---------------------------------------------------------------------------------------------------------------------------------------------------------|------------------------------------------------------------------------------------------------------------------------------------------------------------------------------|
| 2 <sup>nd</sup> | 366.12 nm (3.39 eV)<br>$f = 0.0107$<br>HOMO-1→LUMO: -0.22<br>HOMO-1→LUMO+1: -0.12<br>HOMO→LUMO+1: 0.65                                                                                                                        | 368.10 nm (3.37 eV)<br>$f = 0.1762$<br>HOMO-3→LUMO+2: 0.55<br>HOMO-2→LUMO+5: 0.23<br>HOMO-1→LUMO+2: -0.30<br>HOMO→LUMO+5: 0.13                          | 378.66 nm (3.27 eV)<br>$f = 0.0010$<br>HOMO→LUMO: 0.38<br>HOMO→LUMO+1: 0.59                                                                                                  |
| 3 <sup>rd</sup> | 359.44 nm (3.45 eV)<br>$f = 0.0000$<br>HOMO-5→LUMO+2: 0.12<br>HOMO-4→LUMO+3: 0.13<br>HOMO-3→LUMO+3: -0.28<br>HOMO-3→LUMO+4: 0.29<br>HOMO-2→LUMO+2: 0.27<br>HOMO-2→LUMO+5: 0.29<br>HOMO-1→LUMO+6: -0.25<br>HOMO→LUMO+7: -0.24  | 367.42 nm (3.37 eV)<br>$f = 0.0000$<br>HOMO-4→LUMO+2: 0.15<br>HOMO-2→LUMO+2: -0.39<br>HOMO→LUMO+2: 0.56                                                 | 378.63 nm (3.27 eV)<br>$f = 0.0000$<br>HOMO→LUMO: 0.59<br>HOMO→LUMO+1: -0.38                                                                                                 |
| 4 <sup>th</sup> | 358.87 nm (3.45 eV)<br>$f = 0.0128$<br>HOMO-5→LUMO+3: 0.11<br>HOMO-4→LUMO+2: 0.12<br>HOMO-3→LUMO+2: -0.38<br>HOMO-3→LUMO+5: -0.19<br>HOMO-2→LUMO+3: 0.39<br>HOMO-2→LUMO+4: -0.19<br>HOMO-1→LUMO+6: -0.17<br>HOMO→LUMO+7: 0.18 | 367.38 nm (3.37 eV)<br>$f = 0.0091$<br>HOMO-5→LUMO+2: 0.15<br>HOMO-3→LUMO+2: 0.23<br>HOMO-2→LUMO+3: 0.13<br>HOMO-1→LUMO+2: 0.61<br>HOMO→LUMO+5: 0.14    | 374.17 nm (3.31 eV)<br>$f = 0.5667$<br>HOMO-1→LUMO: 0.14<br>HOMO-1→LUMO+2: 0.46<br>HOMO-1→LUMO+4: 0.47<br>HOMO→LUMO+7: -0.16                                                 |
| 5 <sup>th</sup> | 358.25 nm (3.46 eV)<br>$f = 0.0001$<br>HOMO-3→LUMO: 0.51<br>HOMO-2→LUMO: 0.48                                                                                                                                                 | 363.23 nm (3.41 eV)<br>$f = 0.0002$<br>HOMO-2→LUMO: -0.21<br>HOMO-1→LUMO: 0.49<br>HOMO→LUMO: 0.45                                                       | 372.31 nm (3.33 eV)<br>$f = 0.0000$<br>HOMO-2→LUMO: 0.33<br>HOMO-2→LUMO+1: -0.12<br>HOMO-1→LUMO: 0.25<br>HOMO-1→LUMO+1: 0.55                                                 |
| 6 <sup>th</sup> | 358.25 nm (3.46 eV)<br>$f = 0.0001$<br>HOMO-3→LUMO+1: -0.47<br>HOMO-2→LUMO+1: 0.51                                                                                                                                            | 363.22 nm (3.41 eV)<br>$f = 0.0002$<br>HOMO-2→LUMO+1: 0.21<br>HOMO-1→LUMO+1: 0.49<br>HOMO→LUMO+1: -0.45                                                 | 372.21 nm (3.33 eV)<br>$f = 0.0204$<br>HOMO-2→LUMO: 0.12<br>HOMO-2→LUMO+1: 0.33<br>HOMO-1→LUMO: 0.54<br>HOMO-1→LUMO+1: -0.25<br>HOMO-1→LUMO+2: -0.11<br>HOMO-1→LUMO+4: -0.11 |
| 7 <sup>th</sup> | 358.01 nm (3.46 eV)<br>$f = 0.0000$<br>HOMO-3→LUMO+3: -0.37<br>HOMO-3→LUMO+4: -0.13<br>HOMO-2→LUMO+2: 0.38<br>HOMO-2→LUMO+5: -0.13<br>HOMO-1→LUMO+6: 0.27<br>HOMO→LUMO+7: 0.27                                                | 359.15 nm (3.45 eV)<br>$f = 0.4539$<br>HOMO-11→LUMO+2: 0.31<br>HOMO-3→LUMO+2: -0.28<br>HOMO-2→LUMO+5: 0.40<br>HOMO-1→LUMO+7: -0.13<br>HOMO→LUMO+5: 0.28 | 369.31 nm (3.36 eV)<br>$f = 0.0000$<br>HOMO-2→LUMO+2: 0.48<br>HOMO-2→LUMO+4: 0.49                                                                                            |
| 8 <sup>th</sup> | 357.56 nm (3.47 eV)<br>$f = 0.2629$<br>HOMO-3→LUMO+2: 0.28<br>HOMO-3→LUMO+5: -0.16<br>HOMO-2→LUMO+3: 0.29<br>HOMO-2→LUMO+4: -0.16<br>HOMO-1→LUMO+6: -0.33<br>HOMO-1→LUMO+7: -0.11<br>HOMO→LUMO+6: -0.11<br>HOMO→LUMO+7: 0.33  | 358.65 nm (3.46 eV)<br>$f = 0.0001$<br>HOMO-2→LUMO: -0.13<br>HOMO-2→LUMO+1: -0.14<br>HOMO-2→LUMO+4: 0.50<br>HOMO→LUMO+4: 0.42                           | 367.08 nm (3.38 eV)<br>$f = 0.0053$<br>HOMO-4→LUMO: 0.64<br>HOMO-4→LUMO+1: 0.27                                                                                              |

|                  |                                                                                                                                                                                                                                                                         |                                                                                                                                                                                                                           |                                                                                                                                                      |
|------------------|-------------------------------------------------------------------------------------------------------------------------------------------------------------------------------------------------------------------------------------------------------------------------|---------------------------------------------------------------------------------------------------------------------------------------------------------------------------------------------------------------------------|------------------------------------------------------------------------------------------------------------------------------------------------------|
| 9 <sup>th</sup>  | 356.78 nm (3.48 eV)<br>$f = 0.0002$<br>HOMO-1→LUMO+3: 0.20<br>HOMO→LUMO+2: 0.50<br>HOMO→LUMO+3: -0.45                                                                                                                                                                   | 358.64 nm (3.46 eV)<br>$f = 0.0075$<br>HOMO-2→LUMO: 0.14<br>HOMO-2→LUMO+1: -0.12<br>HOMO-2→LUMO+3: 0.50<br>HOMO→LUMO+3: 0.41                                                                                              | 367.07 nm (3.38 eV)<br>$f = 0.0066$<br>HOMO-3→LUMO: -0.27<br>HOMO-3→LUMO+1: 0.64                                                                     |
| 10 <sup>th</sup> | 356.76 nm (3.48 eV)<br>$f = 0.0006$<br>HOMO-1→LUMO+2: 0.48<br>HOMO-1→LUMO+3: 0.46<br>HOMO→LUMO+3: 0.20                                                                                                                                                                  | 356.94 nm (3.47 eV)<br>$f = 0.0000$<br>HOMO-8→LUMO+2: 0.64<br>HOMO-4→LUMO+2: 0.16<br>HOMO→LUMO+2: -0.11                                                                                                                   | 363.90 nm (3.41 eV)<br>$f = 0.0498$<br>HOMO-7→LUMO+2: -0.13<br>HOMO-5→LUMO+2: 0.42<br>HOMO-5→LUMO+4: 0.46<br>HOMO→LUMO+7: -0.25                      |
| 11 <sup>th</sup> | 355.44 nm (3.49 eV)<br>$f = 0.0000$<br>HOMO-5→LUMO+2: 0.34<br>HOMO-4→LUMO+3: 0.34<br>HOMO-3→LUMO+4: 0.16<br>HOMO-2→LUMO+2: -0.19<br>HOMO-2→LUMO+5: 0.17<br>HOMO-1→LUMO+6: 0.23<br>HOMO→LUMO+7: 0.23                                                                     | 356.52 nm (3.48 eV)<br>$f = 0.0001$<br>HOMO-2→LUMO: 0.55<br>HOMO-2→LUMO+1: -0.11<br>HOMO-2→LUMO+3: -0.14<br>HOMO→LUMO: 0.34<br>HOMO→LUMO+3: -0.12                                                                         | 362.03 nm (3.42 eV)<br>$f = 0.0000$<br>HOMO-5→LUMO: -0.16<br>HOMO-2→LUMO: 0.36<br>HOMO-2→LUMO+1: 0.47<br>HOMO-1→LUMO: -0.35                          |
| 12 <sup>th</sup> | 354.93 nm (3.49 eV)<br>$f = 0.0645$<br>HOMO-3→LUMO+2: 0.45<br>HOMO-3→LUMO+3: -0.14<br>HOMO-2→LUMO+2: -0.17<br>HOMO-2→LUMO+3: 0.48                                                                                                                                       | 356.51 nm (3.48 eV)<br>$f = 0.0001$<br>HOMO-2→LUMO: 0.11<br>HOMO-2→LUMO+1: 0.55<br>HOMO-2→LUMO+3: 0.10<br>HOMO-2→LUMO+4: 0.14<br>HOMO→LUMO+1: 0.34<br>HOMO→LUMO+4: 0.12                                                   | 362.01 nm (3.42 eV)<br>$f = 0.0000$<br>HOMO-5→LUMO+1: -0.16<br>HOMO-2→LUMO: 0.47<br>HOMO-2→LUMO+1: -0.36<br>HOMO-1→LUMO+1: -0.35                     |
| 13 <sup>th</sup> | 354.92 nm (3.49 eV)<br>$f = 0.0071$<br>HOMO-3→LUMO+2: 0.15<br>HOMO-3→LUMO+3: 0.49<br>HOMO-2→LUMO+2: 0.44<br>HOMO-2→LUMO+3: 0.14                                                                                                                                         | 355.68 nm (3.49 eV)<br>$f = 0.0002$<br>HOMO-10→LUMO: -0.11<br>HOMO-9→LUMO+1: -0.11<br>HOMO-7→LUMO+4: -0.37<br>HOMO-6→LUMO+3: 0.37<br>HOMO-2→LUMO+7: -0.13<br>HOMO-1→LUMO+6: 0.27<br>HOMO→LUMO+7: 0.24                     | 360.28 nm (3.44 eV)<br>$f = 0.0008$<br>HOMO-2→LUMO+3: -0.14<br>HOMO-1→LUMO+2: -0.19<br>HOMO-1→LUMO+4: 0.18<br>HOMO→LUMO+3: 0.63                      |
| 14 <sup>th</sup> | 354.84 nm (3.49 eV)<br>$f = 0.5060$<br>HOMO-5→LUMO+3: 0.11<br>HOMO-4→LUMO+2: 0.11<br>HOMO-3→LUMO+5: -0.16<br>HOMO-2→LUMO+4: -0.16<br>HOMO-1→LUMO+2: -0.32<br>HOMO-1→LUMO+3: 0.20<br>HOMO-1→LUMO+6: 0.12<br>HOMO→LUMO+2: 0.27<br>HOMO→LUMO+3: 0.39<br>HOMO→LUMO+7: -0.12 | 353.61 nm (3.51 eV)<br>$f = 0.0000$<br>HOMO-2→LUMO+3: 0.20<br>HOMO-2→LUMO+4: -0.23<br>HOMO-1→LUMO: 0.13<br>HOMO-1→LUMO+3: 0.38<br>HOMO-1→LUMO+4: -0.32<br>HOMO→LUMO: -0.11<br>HOMO→LUMO+3: -0.23<br>HOMO→LUMO+4: 0.26     | 360.25 nm (3.44 eV)<br>$f = 0.0000$<br>HOMO-2→LUMO+4: 0.10<br>HOMO-1→LUMO+3: -0.22<br>HOMO→LUMO+2: 0.46<br>HOMO→LUMO+4: -0.43                        |
| 15 <sup>th</sup> | 354.79 nm (3.49 eV)<br>$f = 0.0104$<br>HOMO-1→LUMO+2: -0.31<br>HOMO-1→LUMO+3: 0.42<br>HOMO→LUMO+2: -0.38<br>HOMO→LUMO+3: -0.25                                                                                                                                          | 353.61 nm (3.51 eV)<br>$f = 0.0001$<br>HOMO-2→LUMO+3: -0.23<br>HOMO-2→LUMO+4: -0.19<br>HOMO-1→LUMO+1: -0.13<br>HOMO-1→LUMO+3: 0.32<br>HOMO-1→LUMO+4: 0.38<br>HOMO→LUMO+1: -0.10<br>HOMO→LUMO+3: 0.27<br>HOMO→LUMO+4: 0.22 | 354.65 nm (3.50 eV)<br>$f = 0.0001$<br>HOMO-2→LUMO+2: 0.21<br>HOMO-2→LUMO+4: -0.22<br>HOMO-1→LUMO+3: 0.55<br>HOMO→LUMO+2: 0.22<br>HOMO→LUMO+4: -0.21 |

**Table S10.** Results of TD-DFT calculations with geometries of the large supercell extended by 0.5 unit cells for two axes of **1ar** replaced by optimized structures based on the B3LYP/6-31G(d,p) level of theory.

| Extension by 0.5 units for two axes |                                                                                                                                                                                                             |                                                                                                                                                                                |                                                                                                               |
|-------------------------------------|-------------------------------------------------------------------------------------------------------------------------------------------------------------------------------------------------------------|--------------------------------------------------------------------------------------------------------------------------------------------------------------------------------|---------------------------------------------------------------------------------------------------------------|
| Excited states                      | a and b                                                                                                                                                                                                     | b and c                                                                                                                                                                        | a and c                                                                                                       |
| 1 <sup>st</sup>                     | 399.21 nm (3.11 eV)<br><i>f</i> = 0.0000<br>HOMO→LUMO+3: 0.12<br>HOMO→LUMO+4: -0.12<br>HOMO→LUMO+5: -0.46<br>HOMO→LUMO+6: 0.49                                                                              | 394.99 nm (3.14 eV)<br><i>f</i> = 0.0042<br>HOMO→LUMO: -0.14<br>HOMO→LUMO+2: -0.17<br>HOMO→LUMO+5: 0.62<br>HOMO→LUMO+6: 0.21                                                   | 397.72 nm (3.12 eV)<br><i>f</i> = 0.0051<br>HOMO-2→LUMO+4: -0.10<br>HOMO→LUMO+4: 0.69                         |
| 2 <sup>nd</sup>                     | 385.79 nm (3.21 eV)<br><i>f</i> = 0.0107<br>HOMO-1→LUMO+3: 0.13<br>HOMO-1→LUMO+4: -0.11<br>HOMO-1→LUMO+5: -0.41<br>HOMO-1→LUMO+6: 0.45<br>HOMO-1→LUMO-7: -0.20<br>HOMO-1→LUMO+8: 0.17<br>HOMO→LUMO+7: -0.13 | 392.93 nm (3.16 eV)<br><i>f</i> = 0.0005<br>HOMO→LUMO: 0.69<br>HOMO→LUMO+5: 0.12                                                                                               | 391.25 nm (3.17 eV)<br><i>f</i> = 0.0002<br>HOMO→LUMO: 0.70                                                   |
| 3 <sup>rd</sup>                     | 382.31 nm (3.24 eV)<br><i>f</i> = 0.0000<br>HOMO→LUMO: 0.71                                                                                                                                                 | 392.29 nm (3.16 eV)<br><i>f</i> = 0.0028<br>HOMO-3→LUMO+2: 0.52<br>HOMO-2→LUMO+2: -0.30<br>HOMO-1→LUMO+2: 0.32                                                                 | 387.18 nm (3.20 eV)<br><i>f</i> = 0.0002<br>HOMO→LUMO+1: 0.70                                                 |
| 4 <sup>th</sup>                     | 380.96 nm (3.25 eV)<br><i>f</i> = 0.0000<br>HOMO-1→LUMO+2: 0.12<br>HOMO→LUMO+1: -0.40<br>HOMO→LUMO+2: 0.57                                                                                                  | 392.12 nm (3.16 eV)<br><i>f</i> = 0.0002<br>HOMO→LUMO+1: 0.69                                                                                                                  | 384.01 nm (3.23 eV)<br><i>f</i> = 0.0010<br>HOMO-3→LUMO: -0.17<br>HOMO-1→LUMO: 0.68                           |
| 5 <sup>th</sup>                     | 379.46 nm (3.27 eV)<br><i>f</i> = 0.0000<br>HOMO→LUMO+1: 0.58<br>HOMO→LUMO+2: 0.40                                                                                                                          | 384.66 nm (3.22 eV)<br><i>f</i> = 0.0008<br>HOMO-3→LUMO: 0.17<br>HOMO-2→LUMO: 0.67<br>HOMO-1→LUMO: 0.11                                                                        | 383.03 nm (3.24 eV)<br><i>f</i> = 0.0009<br>HOMO→LUMO+2: 0.70                                                 |
| 6 <sup>th</sup>                     | 377.26 nm (3.29 eV)<br><i>f</i> = 0.0108<br>HOMO→LUMO+3: 0.16<br>HOMO→LUMO+7: 0.55<br>HOMO→LUMO+8: 0.15                                                                                                     | 384.21 nm (3.23 eV)<br><i>f</i> = 0.0008<br>HOMO-3→LUMO+1: -0.15<br>HOMO-1→LUMO+1: 0.68                                                                                        | 380.09 nm (3.26 eV)<br><i>f</i> = 0.0004<br>HOMO-3→LUMO+1: -0.14<br>HOMO-1→LUMO+1: 0.69                       |
| 7 <sup>th</sup>                     | 376.16 nm (3.30 eV)<br><i>f</i> = 0.0017<br>HOMO-2→LUMO+3: 0.16<br>HOMO-1→LUMO+3: -0.41<br>HOMO→LUMO+3: 0.44<br>HOMO→LUMO+7: -0.29                                                                          | 380.83 nm (3.26 eV)<br><i>f</i> = 0.0395<br>HOMO-4→LUMO+2: 0.12<br>HOMO-2→LUMO+2: -0.14<br>HOMO-1→LUMO+2: -0.12<br>HOMO→LUMO+2: 0.63<br>HOMO→LUMO+5: 0.12<br>HOMO→LUMO+6: 0.13 | 378.50 nm (3.28 eV)<br><i>f</i> = 0.0814<br>HOMO-2→LUMO+4: -0.17<br>HOMO-1→LUMO+4: -0.23<br>HOMO→LUMO+7: 0.62 |
| 8 <sup>th</sup>                     | 374.52 nm (3.31 eV)<br><i>f</i> = 0.0005<br>HOMO-2→LUMO+2: 0.20<br>HOMO-1→LUMO+1: -0.39<br>HOMO-1→LUMO+2: 0.53<br>HOMO→LUMO+2: -0.13                                                                        | 378.52 nm (3.28 eV)<br><i>f</i> = 0.0084<br>HOMO-2→LUMO: -0.12<br>HOMO-1→LUMO: 0.68                                                                                            | 376.70 nm (3.29 eV)<br><i>f</i> = 0.0011<br>HOMO-5→LUMO: 0.70                                                 |
| 9 <sup>th</sup>                     | 374.15 nm (3.31 eV)                                                                                                                                                                                         | 377.58 nm (3.28 eV)                                                                                                                                                            | 376.29 nm (3.29 eV)                                                                                           |

|                  |                                                                                                                                                                                                                                                 |                                                                                                                                                                                                                                                    |                                                                                                                                                    |
|------------------|-------------------------------------------------------------------------------------------------------------------------------------------------------------------------------------------------------------------------------------------------|----------------------------------------------------------------------------------------------------------------------------------------------------------------------------------------------------------------------------------------------------|----------------------------------------------------------------------------------------------------------------------------------------------------|
|                  | $f = 0.0015$<br>HOMO-2→LUMO+5: -0.18<br>HOMO-2→LUMO+6: 0.19<br>HOMO-1→LUMO: 0.44<br>HOMO-1→LUMO+3: 0.34<br>HOMO→LUMO+3: 0.29                                                                                                                    | $f = 0.1781$<br>HOMO-6→LUMO+2: 0.15<br>HOMO-4→LUMO+2: -0.14<br>HOMO-3→LUMO+2: -0.32<br>HOMO-3→LUMO+5: 0.13<br>HOMO-2→LUMO+2: -0.21<br>HOMO-2→LUMO+5: 0.18<br>HOMO-1→LUMO: -0.13<br>HOMO-1→LUMO+2: 0.33<br>HOMO-1→LUMO+5: -0.30                     | $f = 0.1392$<br>HOMO-1→LUMO+4: 0.64<br>HOMO→LUMO+7: 0.22                                                                                           |
| 10 <sup>th</sup> | 373.96 nm (3.32 eV)<br>$f = 0.0037$<br>HOMO-2→LUMO+5: 0.24<br>HOMO-2→LUMO+6: -0.26<br>HOMO-2→LUMO+7: 0.11<br>HOMO-1→LUMO: 0.53<br>HOMO-1→LUMO+3: -0.21<br>HOMO→LUMO+3: -0.12                                                                    | 375.15 nm (3.30 eV)<br>$f = 0.1486$<br>HOMO-2→LUMO+1: 0.28<br>HOMO-2→LUMO+2: 0.34<br>HOMO-2→LUMO+5: -0.33<br>HOMO-1→LUMO+2: 0.17<br>HOMO-1→LUMO+5: -0.29<br>HOMO→LUMO+2: 0.16                                                                      | 374.30 nm (3.31 eV)<br>$f = 0.0135$<br>HOMO-6→LUMO: -0.13<br>HOMO-2→LUMO: 0.66<br>HOMO-2→LUMO+4: 0.15                                              |
| 11 <sup>th</sup> | 373.73 nm (3.32 eV)<br>$f = 0.0122$<br>HOMO-2→LUMO+3: -0.17<br>HOMO-2→LUMO+5: 0.28<br>HOMO-2→LUMO+6: -0.30<br>HOMO-2→LUMO+7: 0.13<br>HOMO-1→LUMO: -0.18<br>HOMO-1→LUMO+3: 0.31<br>HOMO→LUMO+3: 0.27<br>HOMO→LUMO+7: -0.16<br>HOMO→LUMO+8: -0.11 | 374.73 nm (3.31 eV)<br>$f = 0.0183$<br>HOMO-4→LUMO+1: 0.14<br>HOMO-2→LUMO+1: 0.62<br>HOMO-2→LUMO+2: -0.18<br>HOMO-2→LUMO+5: 0.13<br>HOMO-1→LUMO+5: 0.12                                                                                            | 373.08 nm (3.32 eV)<br>$f = 0.1301$<br>HOMO-2→LUMO: -0.17<br>HOMO-2→LUMO+4: 0.61<br>HOMO-2→LUMO+8: -0.11<br>HOMO→LUMO+7: 0.17<br>HOMO→LUMO+8: 0.10 |
| 12 <sup>th</sup> | 373.12 nm (3.32 eV)<br>$f = 0.0003$<br>HOMO-2→LUMO+2: 0.11<br>HOMO-1→LUMO+1: 0.59<br>HOMO-1→LUMO+2: 0.37                                                                                                                                        | 372.04 nm (3.33 eV)<br>$f = 0.0003$<br>HOMO-4→LUMO: -0.39<br>HOMO-3→LUMO: 0.55<br>HOMO-2→LUMO: -0.18                                                                                                                                               | 369.91 nm (3.35 eV)<br>$f = 0.0003$<br>HOMO-3→LUMO+2: 0.42<br>HOMO-1→LUMO+2: 0.55                                                                  |
| 13 <sup>th</sup> | 371.77 nm (3.34 eV)<br>$f = 0.0007$<br>HOMO→LUMO+5: 0.51<br>HOMO→LUMO+6: 0.47                                                                                                                                                                   | 371.56 nm (3.34 eV)<br>$f = 0.0261$<br>HOMO-6→LUMO+2: -0.21<br>HOMO-4→LUMO+2: 0.11<br>HOMO-3→LUMO+2: 0.15<br>HOMO-3→LUMO+6: 0.23<br>HOMO-2→LUMO+2: 0.21<br>HOMO-2→LUMO+5: 0.43<br>HOMO-1→LUMO+2: -0.12<br>HOMO-1→LUMO+5: -0.30                     | 369.32 nm (3.36 eV)<br>$f = 0.0005$<br>HOMO-3→LUMO+1: 0.21<br>HOMO-1→LUMO+1: 0.67                                                                  |
| 14 <sup>th</sup> | 369.78 nm (3.35 eV)<br>$f = 0.0092$<br>HOMO-3→LUMO+5: -0.16<br>HOMO-3→LUMO+6: 0.18<br>HOMO→LUMO+4: 0.60<br>HOMO→LUMO+8: -0.18                                                                                                                   | 370.66 nm (3.35 eV)<br>$f = 0.0574$<br>HOMO-6→LUMO+2: 0.11<br>HOMO-4→LUMO+2: -0.11<br>HOMO-3→LUMO+6: -0.11<br>HOMO-2→LUMO+2: 0.35<br>HOMO-2→LUMO+5: 0.21<br>HOMO-2→LUMO+6: 0.17<br>HOMO-1→LUMO+2: 0.29<br>HOMO-1→LUMO+5: 0.33<br>HOMO→LUMO+7: 0.11 | 368.77 nm (3.36 eV)<br>$f = 0.0001$<br>HOMO-2→LUMO+2: 0.68<br>HOMO-1→LUMO+2: 0.14                                                                  |
| 15 <sup>th</sup> | 369.61 nm (3.35 eV)<br>$f = 0.0307$<br>HOMO-3→LUMO+5: 0.31<br>HOMO-3→LUMO+6: -0.34<br>HOMO→LUMO+4: 0.34<br>HOMO→LUMO+8: 0.33                                                                                                                    | 369.32 nm (3.36 eV)<br>$f = 0.0003$<br>HOMO-4→LUMO: 0.58<br>HOMO-3→LUMO: 0.40                                                                                                                                                                      | 367.85 nm (3.37 eV)<br>$f = 0.0181$<br>HOMO-3→LUMO: 0.17<br>HOMO-3→LUMO+4: 0.64                                                                    |

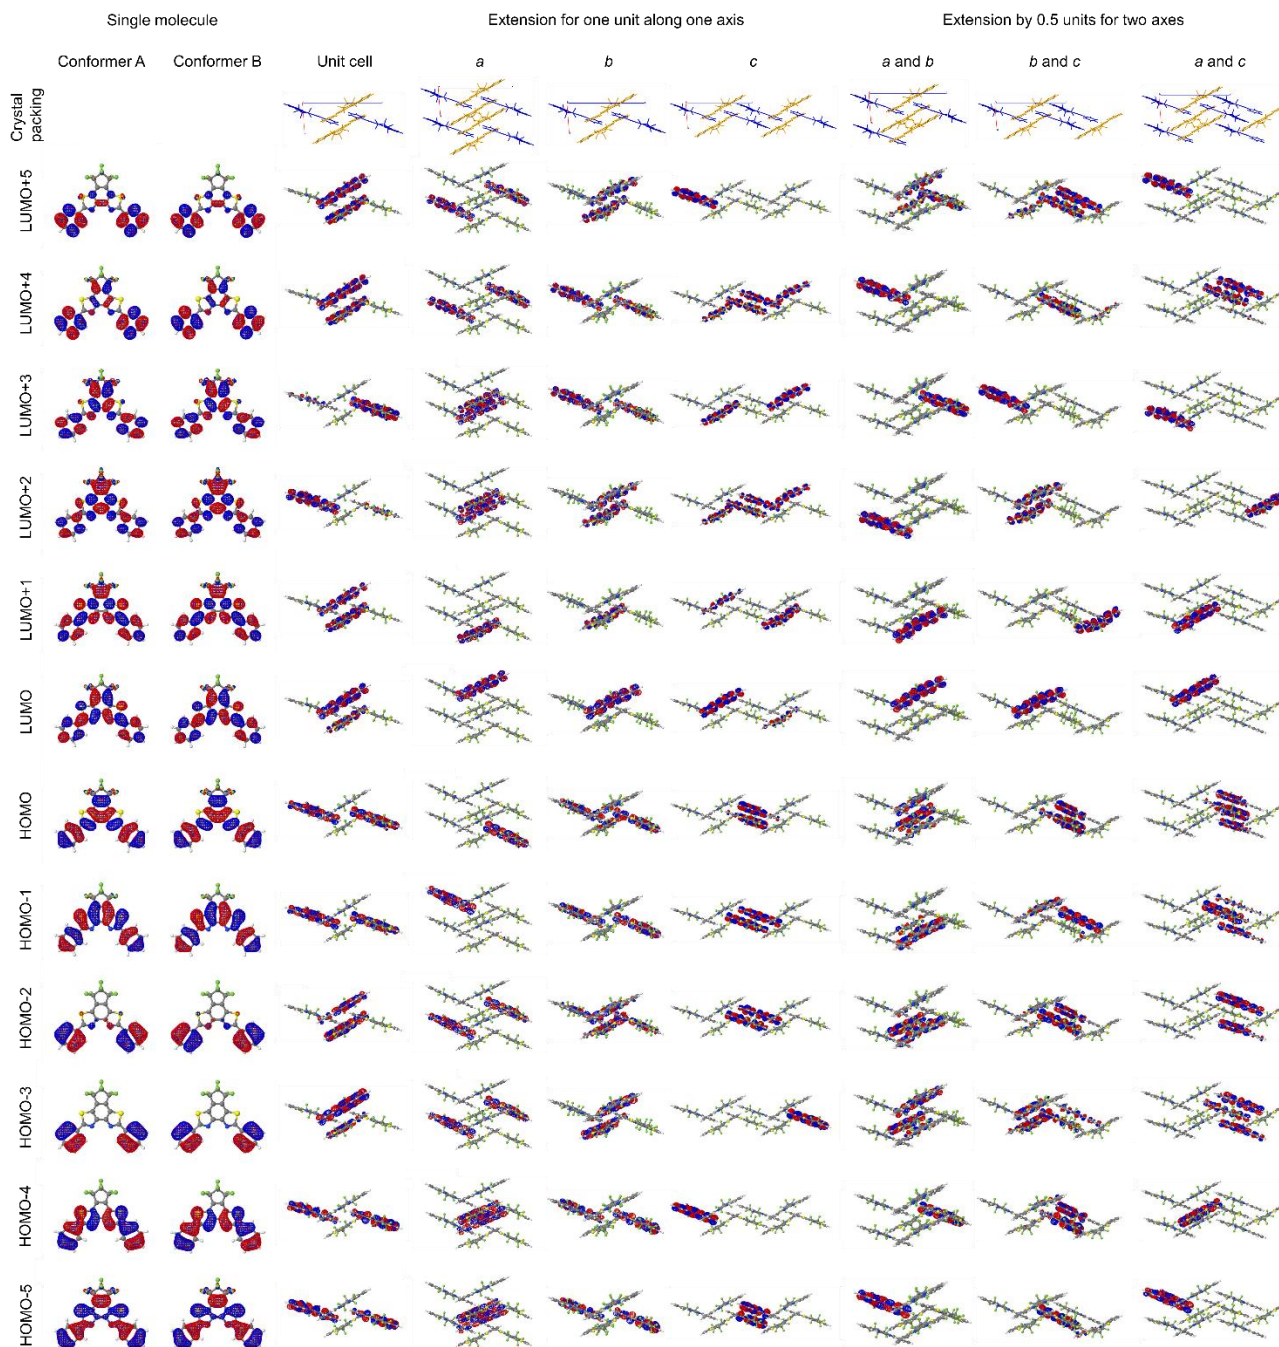

**Fig. S18** Kohn-Sham molecular orbitals estimated for a single molecule, unit cell, and large supercell of **1ar** with geometries replaced by optimized structures based on the B3LYP/6-31G(d,p) level of theory.

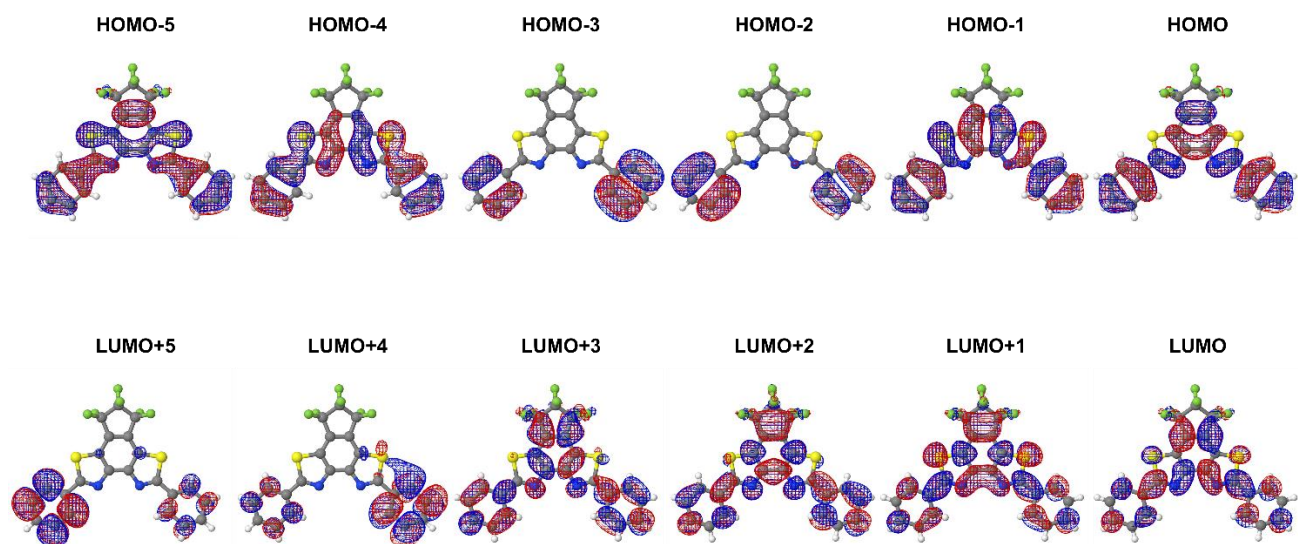

**Fig. S19** Molecular orbitals of conformer A of **1ar** obtained by RHF/6-31G(d) calculation.

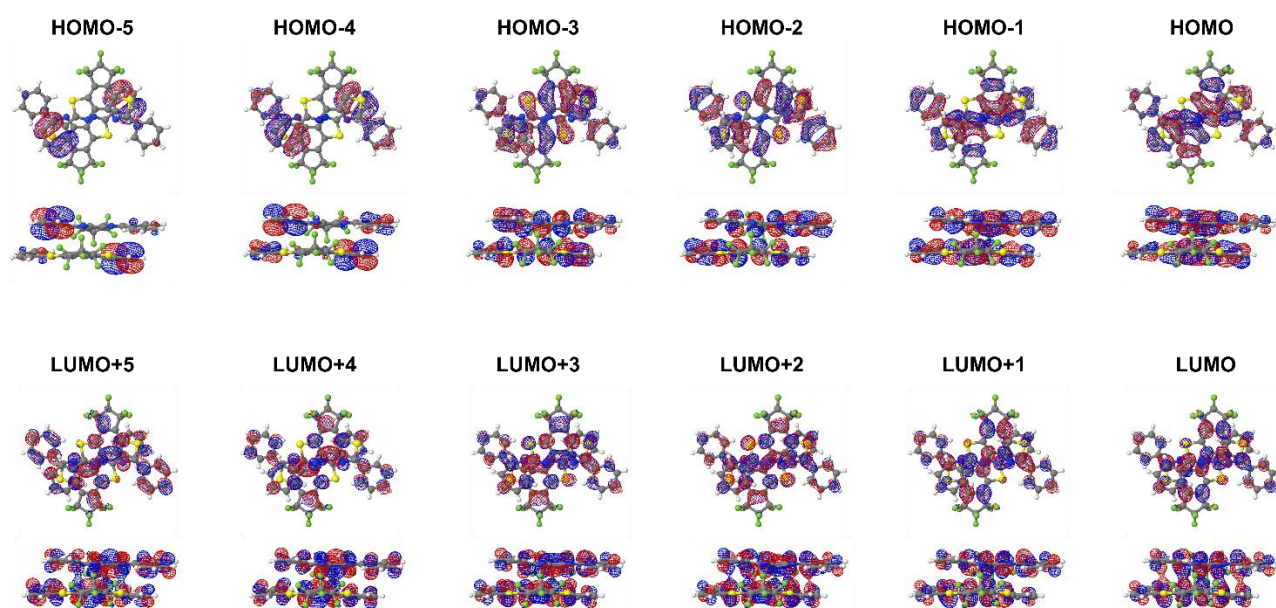

**Fig. S20** Molecular orbitals of a dimer of conformer A of **1ar** shown in the left panel in Fig. 4b obtained by RHF/6-31G(d) calculation.

**Table S11.** Results of TDDFT/6-31G(d,p) calculations of dimer of **1ar** with geometries of crystal structure obtained by X-ray crystallographic analysis.

| Excited states  | Dimer of conformer A:<br>Type 1                                                                                                                 | Dimer of conformer A:<br>Type 2                                                                                              | Dimer of conformer B:<br>Type 3                                                                                           | Dimer of conformer B:<br>Type 4                                                                                                                 |
|-----------------|-------------------------------------------------------------------------------------------------------------------------------------------------|------------------------------------------------------------------------------------------------------------------------------|---------------------------------------------------------------------------------------------------------------------------|-------------------------------------------------------------------------------------------------------------------------------------------------|
| 1 <sup>st</sup> | 373.97 nm (3.32 eV)<br>$f = 0.0000$<br>HOMO→LUMO: 0.70                                                                                          | 360.04 nm (3.44 eV)<br>$f = 0.0000$<br>HOMO→LUMO: 0.69                                                                       | 379.54 nm (3.27 eV)<br>$f = 0.0000$<br>HOMO→LUMO: 0.70                                                                    | 357.80 nm (3.47 eV)<br>$f = 0.0000$<br>HOMO-1→LUMO+1: 0.27<br>HOMO→LUMO: 0.65                                                                   |
| 2 <sup>nd</sup> | 353.99 nm (3.50 eV)<br>$f = 0.1663$<br>HOMO-3→LUMO: 0.31<br>HOMO-1→LUMO: 0.55<br>HOMO→LUMO+1: -0.30                                             | 352.24 nm (3.52 eV)<br>$f = 0.0419$<br>HOMO-3→LUMO: -0.13<br>HOMO-1→LUMO: -0.35<br>HOMO→LUMO+1: 0.59                         | 357.31 nm (3.47 eV)<br>$f = 0.0244$<br>HOMO-3→LUMO: 0.22<br>HOMO-1→LUMO: -0.43<br>HOMO→LUMO+1: 0.51                       | 355.81 nm (3.48 eV)<br>$f = 0.0166$<br>HOMO-1→LUMO: 0.51<br>HOMO→LUMO+1: 0.48                                                                   |
| 3 <sup>rd</sup> | 352.03 nm (3.52 eV)<br>$f = 0.0000$<br>HOMO-2→LUMO: 0.69                                                                                        | 342.53 nm (3.62 eV)<br>$f = 0.0000$<br>HOMO-3→LUMO+1: 0.17<br>HOMO-1→LUMO+1: 0.67                                            | 349.69 nm (3.55 eV)<br>$f = 0.4119$<br>HOMO-3→LUMO: 0.34<br>HOMO-1→LUMO: 0.52<br>HOMO→LUMO+1: 0.30                        | 351.63 nm (3.53 eV)<br>$f = 0.0000$<br>HOMO-3→LUMO+1: 0.11<br>HOMO-2→LUMO: -0.24<br>HOMO-1→LUMO+1: 0.60<br>HOMO→LUMO: -0.25                     |
| 4 <sup>th</sup> | 351.25 nm (3.53 eV)<br>$f = 0.1156$<br>HOMO-3→LUMO: 0.59<br>HOMO-1→LUMO: -0.35                                                                  | 341.38 nm (3.63 eV)<br>$f = 1.0311$<br>HOMO-1→LUMO: 0.61<br>HOMO→LUMO+1: 0.34                                                | 344.62 nm (3.60 eV)<br>$f = 0.0000$<br>HOMO-2→LUMO: 0.68<br>HOMO-1→LUMO+3: 0.11                                           | 347.14 nm (3.57 eV)<br>$f = 0.0000$<br>HOMO-2→LUMO: 0.65<br>HOMO-1→LUMO+1: 0.22<br>HOMO→LUMO+1: -0.11                                           |
| 5 <sup>th</sup> | 333.32 nm (3.72 eV)<br>$f = 0.4533$<br>HOMO-3→LUMO: 0.14<br>HOMO-2→LUMO+1: -0.24<br>HOMO-1→LUMO: 0.21<br>HOMO→LUMO+1: 0.58<br>HOMO→LUMO+2: 0.14 | 333.72 nm (3.72 eV)<br>$f = 0.1349$<br>HOMO-3→LUMO: 0.56<br>HOMO-2→LUMO+1: -0.31<br>HOMO-1→LUMO+3: 0.11<br>HOMO→LUMO+2: 0.21 | 341.15 nm (3.63 eV)<br>$f = 0.6329$<br>HOMO-3→LUMO: 0.53<br>HOMO-1→LUMO: -0.18<br>HOMO→LUMO+1: -0.36<br>HOMO→LUMO+2: 0.17 | 344.96 nm (3.59 eV)<br>$f = 0.1134$<br>HOMO-3→LUMO: -0.28<br>HOMO-2→LUMO+1: 0.46<br>HOMO-1→LUMO: 0.30<br>HOMO→LUMO+1: -0.32                     |
| 6 <sup>th</sup> | 329.35 nm (3.79 eV)<br>$f = 0.0000$<br>HOMO-1→LUMO+1: 0.69                                                                                      | 333.03 nm (3.72 eV)<br>$f = 0.0000$<br>HOMO-3→LUMO+1: -0.27<br>HOMO-2→LUMO: 0.62<br>HOMO→LUMO+3: -0.12                       | 332.84 nm (3.73 eV)<br>$f = 0.0000$<br>HOMO-3→LUMO+1: -0.22<br>HOMO-1→LUMO+1: 0.65                                        | 336.94 nm (3.68 eV)<br>$f = 0.1595$<br>HOMO-3→LUMO: 0.61<br>HOMO-1→LUMO: 0.12<br>HOMO-1→LUMO+3: 0.14<br>HOMO→LUMO+1: -0.21<br>HOMO→LUMO+2: 0.11 |



**Table S12.** Results of CIS/3-21G and CIS(D)/3-21G calculations of dimer of **1ar** with geometries of crystal structure obtained by X-ray crystallographic analysis.

| Excited states  | Dimer of conformer A:                                                                                                                                                         | Dimer of conformer A:                                                                                                                                                                                                           | Dimer of conformer B:                                                                                                                                                                                    | Dimer of conformer B:                                                                                                                                       |
|-----------------|-------------------------------------------------------------------------------------------------------------------------------------------------------------------------------|---------------------------------------------------------------------------------------------------------------------------------------------------------------------------------------------------------------------------------|----------------------------------------------------------------------------------------------------------------------------------------------------------------------------------------------------------|-------------------------------------------------------------------------------------------------------------------------------------------------------------|
|                 | Type 1                                                                                                                                                                        | Type 2                                                                                                                                                                                                                          | Type 3                                                                                                                                                                                                   | Type 4                                                                                                                                                      |
| 1 <sup>st</sup> | CIS<br>266.25 nm (4.66 eV)<br>$f = 0.0000$<br>HOMO-3→LUMO+2: 0.17<br>HOMO-2→LUMO+3: 0.15<br>HOMO-1→LUMO+1: -0.34<br>HOMO→LUMO: 0.50                                           | CIS<br>262.47 nm (4.72 eV)<br>$f = 0.0000$<br>HOMO-3→LUMO+2: 0.18<br>HOMO-2→LUMO+3: -0.16<br>HOMO-1→LUMO+1: -0.40<br>HOMO→LUMO: 0.43<br>HOMO→LUMO+3: 0.12                                                                       | CIS<br>269.14 nm (4.61 eV)<br>$f = 0.0000$<br>HOMO-3→LUMO+2: 0.18<br>HOMO-2→LUMO+3: 0.16<br>HOMO-1→LUMO+1: -0.31<br>HOMO→LUMO: 0.52<br>HOMO→LUMO+3: -0.11                                                | CIS<br>266.68 nm (4.65 eV)<br>$f = 0.0000$<br>HOMO-3→LUMO+2: -0.17<br>HOMO-2→LUMO+3: -0.16<br>HOMO-1→LUMO+1: 0.42<br>HOMO→LUMO: 0.44                        |
|                 | CIS(D)<br>267.82 nm (4.63 eV)                                                                                                                                                 | CIS(D)<br>262.37 nm (4.73 eV)                                                                                                                                                                                                   | CIS(D)<br>271.10 nm (4.57 eV)                                                                                                                                                                            | CIS(D)<br>266.49 nm (4.65 eV)                                                                                                                               |
|                 | CIS<br>256.28 nm (4.84 eV)<br>$f = 1.6763$<br>HOMO-3→LUMO+3: -0.19<br>HOMO-2→LUMO+1: 0.12<br>HOMO-2→LUMO+2: -0.22<br>HOMO-1→LUMO: 0.45<br>HOMO→LUMO+1: -0.36                  | CIS<br>259.25 nm (4.78 eV)<br>$f = 1.9339$<br>HOMO-3→LUMO+3: -0.18<br>HOMO-2→LUMO+1: 0.17<br>HOMO-2→LUMO+2: 0.20<br>HOMO-1→LUMO: 0.42<br>HOMO→LUMO+1: 0.39                                                                      | CIS<br>260.59 nm (4.76 eV)<br>$f = 1.9346$<br>HOMO-3→LUMO+3: 0.17<br>HOMO-2→LUMO+1: -0.19<br>HOMO-2→LUMO+2: 0.18<br>HOMO-1→LUMO: 0.43<br>HOMO→LUMO+1: -0.36                                              | CIS<br>257.86 nm (4.81 eV)<br>$f = 1.6743$<br>HOMO-3→LUMO+3: 0.19<br>HOMO-2→LUMO+2: 0.22<br>HOMO-1→LUMO: 0.40<br>HOMO→LUMO+1: 0.42                          |
|                 | CIS(D)<br>254.84 nm (4.87 eV)                                                                                                                                                 | CIS(D)<br>257.14 nm (4.82 eV)                                                                                                                                                                                                   | CIS(D)<br>258.53 nm (4.80 eV)                                                                                                                                                                            | CIS(D)<br>256.08 nm (4.84 eV)                                                                                                                               |
| 3 <sup>rd</sup> | CIS<br>239.81 nm (5.17 eV)<br>$f = 0.0000$<br>HOMO-3→LUMO+1: 0.34<br>HOMO-2→LUMO: 0.49<br>HOMO-1→LUMO+1: 0.12<br>HOMO-1→LUMO+4: 0.12<br>HOMO→LUMO: 0.10<br>HOMO→LUMO+5: -0.12 | CIS<br>238.36 nm (5.20 eV)<br>$f = 0.0000$<br>HOMO-3→LUMO+1: 0.37<br>HOMO-2→LUMO: 0.44<br>HOMO-1→LUMO+1: 0.12<br>HOMO-1→LUMO+2: 0.10<br>HOMO-1→LUMO+5: 0.11<br>HOMO→LUMO: -0.15<br>HOMO→LUMO+4: 0.14                            | CIS<br>241.52 nm (5.13 eV)<br>$f = 0.0000$<br>HOMO-3→LUMO+1: -0.31<br>HOMO-2→LUMO: 0.46<br>HOMO-1→LUMO+1: -0.24<br>HOMO-1→LUMO+4: -0.11<br>HOMO→LUMO: -0.12<br>HOMO→LUMO+5: -0.12                        | CIS<br>239.50 nm (5.18 eV)<br>$f = 0.0000$<br>HOMO-10→LUMO+2: 0.11<br>HOMO-3→LUMO: -0.41<br>HOMO-2→LUMO+1: 0.45<br>HOMO-1→LUMO+4: 0.13<br>HOMO→LUMO+5: 0.12 |
|                 | CIS(D)<br>283.06 nm (4.38 eV)                                                                                                                                                 | CIS(D)<br>275.02 nm (4.51 eV)                                                                                                                                                                                                   | CIS(D)<br>275.87 nm (4.49 eV)                                                                                                                                                                            | CIS(D)<br>282.02 nm (4.40 eV)                                                                                                                               |
|                 | CIS<br>234.85 nm (5.28 eV)<br>$f = 0.6499$<br>HOMO-3→LUMO: 0.48<br>HOMO-2→LUMO+1: 0.36<br>HOMO-1→LUMO+5: 0.12<br>HOMO→LUMO+4: -0.15                                           | CIS<br>233.17 nm (5.31 eV)<br>$f = 0.6621$<br>HOMO-11→LUMO+2: -0.10<br>HOMO-10→LUMO+3: -0.10<br>HOMO-8→LUMO: 0.12<br>HOMO-3→LUMO: 0.39<br>HOMO-2→LUMO+1: 0.40<br>HOMO-1→LUMO+4: 0.14<br>HOMO→LUMO+1: -0.20<br>HOMO→LUMO+5: 0.14 | CIS<br>235.28 nm (5.27 eV)<br>$f = 0.6728$<br>HOMO-11→LUMO+2: -0.10<br>HOMO-3→LUMO: 0.44<br>HOMO-2→LUMO+1: -0.35<br>HOMO-1→LUMO: 0.12<br>HOMO-1→LUMO+5: -0.13<br>HOMO→LUMO+1: 0.18<br>HOMO→LUMO+4: -0.14 | CIS<br>235.33 nm (5.27 eV)<br>$f = 0.7409$<br>HOMO-10→LUMO+3: 0.48<br>HOMO-3→LUMO+1: 0.48<br>HOMO-2→LUMO: 0.36<br>HOMO-1→LUMO+5: 0.12<br>HOMO→LUMO+4: -0.15 |
|                 | CIS(D)<br>287.54 nm (4.31 eV)                                                                                                                                                 | CIS(D)<br>286.17 nm (4.33 eV)                                                                                                                                                                                                   | CIS(D)<br>286.18 nm (4.33 eV)                                                                                                                                                                            | CIS(D)<br>282.91 nm (4.38 eV)                                                                                                                               |

|                 |                                                                                                                                                                                                                          |                                                                                                                                                                                                                                                                            |                                                                                                                                                                                                                                                                         |                                                                                                                                                                                                                                                  |
|-----------------|--------------------------------------------------------------------------------------------------------------------------------------------------------------------------------------------------------------------------|----------------------------------------------------------------------------------------------------------------------------------------------------------------------------------------------------------------------------------------------------------------------------|-------------------------------------------------------------------------------------------------------------------------------------------------------------------------------------------------------------------------------------------------------------------------|--------------------------------------------------------------------------------------------------------------------------------------------------------------------------------------------------------------------------------------------------|
| 5 <sup>th</sup> | CIS<br>219.20 nm (5.66 eV)<br><i>f</i> = 0.6226<br>HOMO-9→LUMO+1: -0.11<br>HOMO-8→LUMO: -0.22<br>HOMO-4→LUMO: -0.13<br>HOMO-2→LUMO+6: 0.11<br>HOMO-1→LUMO+3: -0.34<br>HOMO→LUMO+2: 0.42<br>CIS(D)<br>231.75 nm (5.35 eV) | CIS<br>221.16 nm (5.61 eV)<br><i>f</i> = 0.0000<br>HOMO-9→LUMO: -0.17<br>HOMO-8→LUMO+1: -0.18<br>HOMO-5→LUMO+1: -0.11<br>HOMO-3→LUMO+6: -0.10<br>HOMO-2→LUMO+3: -0.14<br>HOMO-2→LUMO+7: 0.12<br>HOMO-1→LUMO+2: 0.40<br>HOMO→LUMO+3: -0.34<br>CIS(D)<br>245.10 nm (5.06 eV) | CIS<br>221.25 nm (5.60 eV)<br><i>f</i> = 0.0000<br>HOMO-9→LUMO: 0.20<br>HOMO-8→LUMO+1: 0.17<br>HOMO-3→LUMO+1: 0.10<br>HOMO-3→LUMO+6: 0.11<br>HOMO-2→LUMO+3: 0.15<br>HOMO-2→LUMO+7: -0.10<br>HOMO-1→LUMO+2: 0.35<br>HOMO→LUMO+3: 0.36<br>CIS(D)<br>248.05 nm (5.00 eV)   | CIS<br>219.68 nm (5.64 eV)<br><i>f</i> = 0.0001<br>HOMO-9→LUMO: 0.16<br>HOMO-8→LUMO+1: -0.16<br>HOMO-6→LUMO: -0.11<br>HOMO-3→LUMO+7: -0.10<br>HOMO-2→LUMO+6: -0.11<br>HOMO-1→LUMO+3: -0.35<br>HOMO→LUMO+2: 0.40<br>CIS(D)<br>242.38 nm (5.12 eV) |
|                 | 6 <sup>th</sup>                                                                                                                                                                                                          | CIS<br>218.30 nm (5.68 eV)<br><i>f</i> = 0.0000<br>HOMO-10→LUMO: 0.10<br>HOMO-9→LUMO: 0.15<br>HOMO-8→LUMO+1: 0.14<br>HOMO-4→LUMO+1: 0.12<br>HOMO-3→LUMO+6: -0.10<br>HOMO-2→LUMO+3: 0.10<br>HOMO-1→LUMO+2: 0.39<br>HOMO→LUMO+3: -0.36<br>CIS(D)<br>239.95 nm (5.17 eV)      | CIS<br>217.45 nm (5.70 eV)<br><i>f</i> = 0.7742<br>HOMO-9→LUMO+1: -0.14<br>HOMO-8→LUMO: -0.17<br>HOMO-5→LUMO: -0.11<br>HOMO-3→LUMO+7: 0.10<br>HOMO-2→LUMO+2: 0.10<br>HOMO-2→LUMO+6: -0.11<br>HOMO-1→LUMO+3: -0.37<br>HOMO→LUMO+2: 0.40<br>CIS(D)<br>227.78 nm (5.44 eV) | CIS<br>219.57 nm (5.65 eV)<br><i>f</i> = 0.6646<br>HOMO-9→LUMO+1: -0.15<br>HOMO-8→LUMO+1: -0.19<br>HOMO-3→LUMO+7: -0.11<br>HOMO-2→LUMO+6: 0.11<br>HOMO-1→LUMO+3: 0.34<br>HOMO→LUMO+2: 0.43<br>CIS(D)<br>232.33 nm (5.34 eV)                      |

**Table S13.** Results of CIS/3-21G and CIS(D)/3-21G calculations of monomer of **1ar** with geometries of crystal structure obtained by X-ray crystallographic analysis.

| Excited States  | Conformer A                                                                                                                                                                                     | Conformer B                                                                                                                                                                                    |
|-----------------|-------------------------------------------------------------------------------------------------------------------------------------------------------------------------------------------------|------------------------------------------------------------------------------------------------------------------------------------------------------------------------------------------------|
| 1 <sup>st</sup> | CIS<br>258.52 nm (4.80 eV)<br><i>f</i> = 1.0516<br>HOMO-4→LUMO+2: -0.11<br>HOMO-1→LUMO+1: -0.28<br>HOMO→LUMO: 0.60<br>CIS(D)<br>255.20 nm (4.86 eV)                                             | CIS<br>260.71 nm (4.76 eV)<br><i>f</i> = 1.0786<br>HOMO-4→LUMO+2: -0.10<br>HOMO-1→LUMO+1: -0.28<br>HOMO→LUMO: 0.60<br>CIS(D)<br>257.31 nm (4.82 eV)                                            |
|                 | 2 <sup>nd</sup>                                                                                                                                                                                 | CIS<br>233.58 nm (5.31 eV)<br><i>f</i> = 0.5177<br>HOMO-5→LUMO+1: -0.15<br>HOMO-4→LUMO: 0.11<br>HOMO-4→LUMO+3: 0.11<br>HOMO-1→LUMO: 0.61<br>HOMO→LUMO+2: 0.20<br>CIS(D)<br>275.24 nm (4.50 eV) |
| 3 <sup>rd</sup> | CIS<br>217.92 nm (5.69 eV)<br><i>f</i> = 0.3549<br>HOMO-5→LUMO+2: -0.13<br>HOMO-4→LUMO: 0.25<br>HOMO-2→LUMO: -0.11<br>HOMO-1→LUMO+3: 0.17<br>HOMO→LUMO+1: 0.56<br>CIS(D)<br>233.94 nm (5.30 eV) | CIS<br>218.92 nm (5.66 eV)<br><i>f</i> = 0.3192<br>HOMO-5→LUMO+2: -0.14<br>HOMO-4→LUMO: 0.26<br>HOMO-2→LUMO: 0.11<br>HOMO-1→LUMO+3: 0.17<br>HOMO→LUMO+1: 0.56<br>CIS(D)<br>236.55 nm (5.24 eV) |

**Table S14.** Results of TDDFT with B3LYP/6-31G(d), SAC-CI/6-31G(d), CIS/3-21G, and CIS(D)/3-21G calculations of monomer of **1ar** with C<sub>2v</sub> symmetry-imposed structure optimized by B3LYP/6-31G(d).

| Excited states  | TDDFT with B3LYP/6-31G(d)                                                                                          | SAC-CI/6-31G(d)                                                           | CIS(D)/3-21G<br>CIS/3-21G                                                                   |
|-----------------|--------------------------------------------------------------------------------------------------------------------|---------------------------------------------------------------------------|---------------------------------------------------------------------------------------------|
| 1 <sup>st</sup> | 346.13 nm (3.58 eV)<br>$f = 0.7532$<br>HOMO→LUMO: 0.70<br>Symmetry: B2                                             | 310.04 nm (4.00 eV)<br>$f = 0.1368$<br>HOMO-1→LUMO: -0.79<br>Symmetry: A1 | CIS(D)<br>278.76 nm (4.45 eV)<br>CIS<br>237.89 nm (5.21 eV)<br>$f = 0.5917$<br>Symmetry: A1 |
| 2 <sup>nd</sup> | 342.89 nm (3.62 eV)<br>$f = 0.1157$<br>HOMO-1→LUMO: 0.65<br>HOMO→LUMO+1: -0.22<br>Symmetry: A1                     | 287.86 nm (4.31 eV)<br>$f = 0.9781$<br>HOMO→LUMO: 0.89<br>Symmetry: B2    | CIS(D)<br>261.80 nm (4.74 eV)<br>CIS<br>266.12 nm (4.66 eV)<br>$f = 1.0684$<br>Symmetry: B2 |
| 3 <sup>rd</sup> | 295.90 nm (4.19 eV)<br>$f = 0.4069$<br>HOMO-2→LUMO: 0.12<br>HOMO-1→LUMO: 0.22<br>HOMO→LUMO+1: 0.65<br>Symmetry: A1 | 256.67 nm (4.83 eV)<br>$f = 0.6277$<br>HOMO→LUMO+1: -0.79<br>Symmetry: A1 | CIS(D)<br>242.53 nm (5.11 eV)<br>CIS<br>222.50 nm (5.57 eV)<br>$f = 0.3360$<br>Symmetry: A1 |

\* Although results of SAC-CI involve double excitations, only major contributions of single excitations are shown.

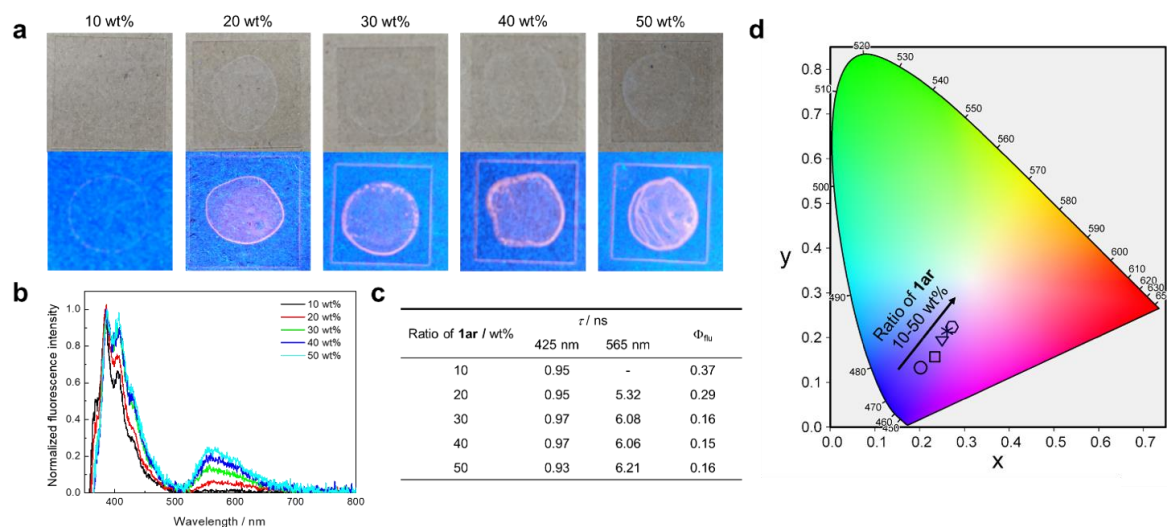

**Fig. S21** (a) Photographs of fluorescence emission of **1ar**/PS composite films at various ratios of **1ar** (10-50 wt%) before (top) and under UV light ( $\lambda = 365$  nm) irradiation (bottom). (b) Fluorescence spectrum of **1ar**/PS composite films ( $\lambda_{exc} = 340$  nm). (c) Fluorescence lifetime ( $\tau$ ) and fluorescence quantum yield ( $\Phi_{Flu}$ ) of **1ar**/PS composite films. CIE 1931 coordinates of emission of **1ar**/PS composite films. The ratio of **1ar** was 10 (circle), 20 (square), 30 (triangle), 40 (asterisk), and 50 wt% (hexagon), respectively ( $\lambda_{exc} = 340$  nm). These observations and measurements were performed at room temperature.

## References

- S1. H. E. Gottlieb, V. Kotlyar, A. Nudelman, *J. Org. Chem.* 1997, **62**, 7512–7515.
- S2. J. V. Morris, M. A. Mahaney, J. R. Huber, *J. Phys. Chem.* 1976, **80**, 969–974.
- S3. <http://phonon-spectrum.com>
- S4. Gaussian 16, Revision C.01, M. J. Frisch, G. W. Trucks, H. B. Schlegel, G. E. Scuseria, M. A. Robb, J. R. Cheeseman, G. Scalmani, V. Barone, G. A. Petersson, H. Nakatsuji, X. Li, M. Caricato, A. V. Marenich, J. Bloino, B. G. Janesko, R. Gomperts, B. Mennucci, H. P. Hratchian, J. V. Ortiz, A. F. Izmaylov, J. L. Sonnenberg, D. Williams-Young, F. Ding, F. Lipparini, F. Egidi, J. Goings, B. Peng, A. Petrone, T. Henderson, D. Ranasinghe, V. G. Zakrzewski, J. Gao, N. Rega, G. Zheng, W. Liang, M. Hada, M. Ehara, K. Toyota, R. Fukuda, J. Hasegawa, M. Ishida, T. Nakajima, Y. Honda, O. Kitao, H. Nakai, T. Vreven, K. Throssell, J. A. Montgomery, Jr., J. E. Peralta, F. Ogliaro, M. J. Bearpark, J. J. Heyd, E. N. Brothers, K. N. Kudin, V. N. Staroverov, T. A. Keith, R. Kobayashi, J. Normand, K. Raghavachari, A. P. Rendell, J. C. Burant, S. S. Iyengar, J. Tomasi, M. Cossi, J. M. Millam, M. Klene, C. Adamo, R. Cammi, J. W. Ochterski, R. L. Martin, K. Morokuma, O. Farkas, J. B. Foresman, and D. J. Fox, Gaussian, Inc., Wallingford CT, 2016.
- S5. P. Hohenberg, W. Kohn, *Phys. Rev.* 1964, **136**, B864–B871.
- S6. W. Kohn, L. J. Sham, *Phys. Rev.* 1965, **140**, A1133–A1138.
- S7. A. D. Becke, *Phys. Rev. A* 1988, **38**, 3098–3100.
- S8. A. D. Becke, *J. Chem. Phys.* 1993, **98**, 5648–5652.
- S9. C. Lee, W. Yang, R. G. Parr, *Phys. Rev. B* 1988, **37**, 785–789.
- S10. S. Grimme, *J. Comp. Chem.* 2006, **27**, 1787–1799.
- S11. <http://www.jmol.org>
- S12. M. Head-Gordon, R. J. Rico, M. Oumi, T. J. Lee, *Chem. Phys. Lett.* 1994, **219**, 21–29.
- S13. M. Head-Gordon, D. Maurice, M. Oumi, *Chem. Phys. Lett.* 1994, **246**, 114–21.
- S14. R. E. Stratmann, G. E. Scuseria, M. J. Frisch, *J. Chem. Phys.* 1998, **109**, 8218–8224.
- S15. R. Bauernschmitt, R. Ahlrichs, *Chem. Phys. Lett.* 1996, **256**, 454–464.
- S16. M. E. Casida, C. Jamorski, K. C. Casida, D. R. Salahub, *J. Chem. Phys.* 1998, **108**, 4439–4449.
- S17. N. J. Hestand, F. C. Spano, *Chem. Rev.* 2018, **118**, 7069–7163.
- S18. F. Würthner, T. E. Kaiser, C. R. Saha-Möller, *Angew. Chem. Int. Ed.* 2011, **50**, 3376–3410.
- S19. Z. He, W. Zhao, J. W.Y. Lam, Q. Peng, H. Ma, G. Liang, Z. Shuai, B. Z. Tang, *Nat. Commun.* 2017, **8**: 416.
- S20. Q. Y. Yang, J. M. Lehn, *Angew. Chem. Int. Ed.* 2014, **53**, 4572–4577.
- S21. X. H. Jin, C. Chen, C. X. Ren, L. X. Cai, J. Zhang, *Chem. Commun.* 2014, **50**, 15878–15881.
- S22. H. Liu, X. Cheng, H. Zhang, Y. Wang, H. Zhang, S. Yamaguchi, *Chem. Commun.* 2017, **53**, 7832–7835.
- S23. Z. Xie, C. Chen, S. Xu, J. Li, Y. Zhang, S. Liu, J. Xu, Z. Chi, *Angew. Chem. Int. Ed.* 2015, **54**, 7181–7184.
- S24. S. Wang, G. Wang, X. Liang, D. Li, Z. Zhang, K. Guo, J. Li, Y. Miao, H. Wang, *Dyes Pigm.* 2022,

**204**, 110450.

- S25. Y. C. Wei, Z. Zhang, Y. A. Chen, C. H. Wu, Z. Y. Liu, S. Y. Ho, J. C. Liu, J. A. Lin, P. T. Chou, *Commun. Chem.* 2019, **2**, Article number: 10.
- S26. Y. Tsuchiya, K. Yamaguchi, Y. Miwa, S. Kutsumizu, M. Minoura, T. Murai, *Bull. Chem. Soc. Jpn.* 2020, **93**, 927–935.
- S27. C. Zhou, S. Zhang, Y. Guo, H. Liu, T. Shan, X. Liang, B. Yang, Y. Ma, *Adv. Funct. Mater.* 2018, **28**, 1802407.
- S28. Y. Wang, Q. Sun, L. Yue, J. Ma, S. Yuan, D. Liu, H. Zhang, S. Xue, W. Yang, *Adv. Opt. Mater.* 2021, **9**, 2101075.
- S29. I. M. Resta, J. F. Miravet, M. Yamaji, F. Galindo, *J. Mater. Chem. C* 2020, **8**, 14348.
- S30. N. N. Zhang, C. Sun, X. M. Jiang, X. S. Xing, Y. Yan, L. Z. Cai, M. S. Wang, G. C. Guo, *Chem. Commun.* 2017, **53**, 9269–9272
- S31.
